# Supplementary material for: Lung Injury in COVID-19 Has Pulmonary Edema as an Important Component and Treatment with Furosemide and Negative Fluid Balance (NEGBAL) Decreases Mortality
Source: MDPI journal article supplement (doi:10.3390/jcm12041542), 2023-02-15
Supplement: s1 [file s1]

## Appendix: Supplemental Statistic N° 1

This appendix has been provided by the authors to give readers additional information about their work.

Supplement to: Jose L. Francisco Santos, MD; Patricio Zanardi, MD; Veronica Alo, MD; Vanina Dos Santos, MD; Leonardo Bovone, MD; Marcelo Rodriguez, MD; Federico Magdaleno, MD; Virginia De Langhe, MD; Andrea Villoldo, MD; Romina Martinez Souvielle, MD; Julieta Alconcher, MD; Diego Quiros, MD; Claudio Milicchio, MD and Eduardo Garcia Saiz, MD. **Lung Injury in COVID-19 has Pulmonary Edema as an important component and treatment with Furosemide and Negative Fluid Balance (NEGBAL) decreases mortality.**

### Statistical Report COVID-19 treatment with NEGBAL protocol

**Dr. Hernán A. Vivas**

Centro Marplatense de Investigaciones Matemáticas (UNMDP - CIC)

#### Contents

1. **Data source and description**
2. **Statistical model**
3. **Results**

Table S1. AGE summary

Figure S1. Boxplot for AGE

Table S2. Paired differences t-test between AGE CONTROL and AGE NEGBAL

Table S3. WEIGHT summary

Table S4. Paired differences t-test between WEIGHT CONTROL and WEIGHT NEGBAL

Figure S2: Boxplot for WEIGHT

Table S5: SEX frequencies

Table S6: Pearson's Chi-squared test (Yates' continuity correction)

Table S7: COVID vaccine, 1st dose frequencies

Table S8: Pearson's Chi-squared test (Yates' continuity correction)

Table S9: COVID vaccine, 2nd dose frequencies

Table S10: Pearson's Chi-squared test (Yates' continuity correction)

Table S11: OBESITY frequencies

Table S12: Pearson's Chi-squared test (Yates' continuity correction)

Table S13: HTA frequencies

Table S14: Pearson's Chi-squared test (Yates' continuity correction)

Table S15: DBT frequencies

Table S16: Pearson's Chi-squared test (Yates' continuity correction)

Table S17: EPOC frequencies

Table S18: Pearson's Chi-squared test (Yates' continuity correction)

Table S19: CARDIOP frequencies

Table S20: Fisher's Exact Test

Table S21: HR ADM summary.

Table S22: Paired differences t-test between HR ADM CONTROL and HR ADM NEGBAL

Figure S3: Boxplot for HR ADM.

Table S23: SBP ADM summary

Figure S4: Boxplot for SBP ADM.

Table S24: Paired differences t-test between SBP ADM CONTROL and SBP ADM NEGBAL.

Table S25: DBP ADM summary

Figure S5: Boxplot for DBP ADM.

Table S26: Paired differences t-test between DBP ADM CONTROL and DBP ADM NEGBAL.

Table S27: TEMP ADM summary

Figure S6: Boxplot for TEMP ADM.

Table S28: Paired differences t-test between TEMP ADM CONTROL and TEMP ADM NEGBAL.

Table S29: RR ADM summary.

Table S30: Paired differences t-test between RR ADM CONTROL and RR ADM NEGBAL

Table S31: APACHE ADM summary.  
Figure S7: Boxplot for RR ADM.  
Figure S8: Boxplot for APACHE ADM.  
Table S32: Paired differences  $t$ -test between APACHE ADM CONTROL and APACHE ADM NEGBAL.  
Table S33: BMI summary.  
Figure S9: Boxplot for BMI.  
Table S34: Paired differences  $t$ -test between BMI CONTROL and BMI NEGBAL.  
Table S35: PO2 ADM summary  
Table S36: Paired differences  $t$ -test between PO2 ADM CONTROL and PO2 ADM NEGBAL  
Figure S10: Boxplot for PO2 ADM  
Table S37: FiO2 ADM summary.  
Figure S11: Boxplot for FiO<sub>2</sub> ADM.  
Table S38: Paired differences  $t$ -test between FiO2 ADM CONTROL and FiO2 ADM NEGBAL.  
Table S39: PaFiO2 ADM summary  
Figure S12: Boxplot for PaFiO2 ADM  
Table S40: Paired differences  $t$ -test between PaFiO2 ADM CONTROL and PaFiO2 ADM NEGBAL.  
Table S41:  $P_{CO2}$  ADM summary.  
Figure S13: Boxplot for  $P_{CO2}$  ADM.  
Table S42: Paired differences  $t$ -test between  $P_{CO2}$  ADM CONTROL and  $P_{CO2}$  ADM NEGBAL.  
Table S43:  $HCO_3$  ADM summary.  
Table S44: Paired differences  $t$ -test between  $HCO_3$  ADM CONTROL and  $HCO_3$  ADM NEGBAL.  
Figure S14: Boxplot for  $HCO_3$  ADM.  
Table S45: CREAT ADM summary  
Figure S15: Boxplot for CREAT ADM.  
Table S46: Paired differences  $t$ -test between CREAT ADM CONTROL and CREAT ADM NEGBAL.  
Table S47: LYMP ADM summary.  
Table S48: LYMP D4 summary.

#### 4. Data for the whole population

Table S49: Paired differences  $t$ -test between LYMP ADM CONTROL and LYMP D4 CONTROL  
Figure S16: Boxplot for LYMP ADM v LYMP D4 for CONTROL group.  
Figure S17: Boxplot for LYMP ADM v LYMP D4 for NEGBAL group.  
Table S50: Paired differences  $t$ -test between LYMP ADM NEGBAL and LYMP D4 NEGBAL.  
Table S51: Paired differences  $t$ -test between LYMP ADM CONTROL and LYMP ADM NEGBAL  
Figure S18: Boxplot for LYMP ADM CONTROL v NEGBAL group.  
Figure S19: Boxplot for LYMP D4 CONTROL v NEGBAL group.  
Table S52: Paired differences  $t$ -test between LYMP D4 CONTROL and LYMP D4 NEGBAL.  
Table S53: NAP ADM summary.  
Figure S20: Boxplot for NAP ADM.  
Table S54: Paired differences  $t$ -test between NAP ADM CONTROL and NAP ADM NEGBAL.  
Table S55: HTO ADM summary.  
Table S56: Paired differences  $t$ -test between HTO ADM CONTROL and HTO ADM NEGBAL  
Figure S21: Boxplot for HTO ADM.  
Table S57: AHT frequencies  
Table S58: Pearson's Chi-squared test (Yates' continuity correction  
Table S59: BNP ADM summary.  
Table S60: Paired differences  $t$ -test between BNP ADM CONTROL and BNP ADM NEGBAL.  
Table S61: TROPO ADM summary.  
Figure S22: Boxplot for BNP ADM.  
Figure S23: Boxplot for TROPO ADM.  
Table S62: Paired differences  $t$ -test between TROPO ADM CONTROL and TROPO ADM NEGBAL.  
Table S63: TGO ADM summary.  
Figure S24: Boxplot for TGO ADM.  
Table S64: Paired differences  $t$ -test between TGO ADM CONTROL and TGO ADM NEGBAL  
Table S65: TGP ADM summary.  
Table S66: Paired differences  $t$ -test between TGP ADM CONTROL and TGP ADM NEGBAL  
Figure S25: Boxplot for TGP ADM.  
Table S67: FAL ADM summary.  
Figure S26: Boxplot for FAL ADM.  
Table S68: Paired differences  $t$ -test between FAL ADM CONTROL and FAL ADM NEGBAL  
Table S69: BIT ADM summary.

Figure S27: Boxplot for BIT ADM.

Table S70: Paired differences  $t$ -test between BIT ADM CONTROL and BIT ADM NEGBAL.

Table S71: BID ADM summary.

Figure S28: Boxplot for BID ADM.

Table S72: Paired differences  $t$ -test between BID ADM CONTROL and BID ADM NEGBAL.

Table S73: Average value, maximum, minimum and standard deviation of selected characteristics for the whole population.

Table S74: Percentages of age ranges for the whole population and for CONTROL and NEGBAL groups and  $p$ -value of the comparison CONTROL v NEGBAL.

Table S75: Proportion of whole population for selected categorical variables.

## 1 Data source and description

We analyzed data from 116 patients treated for COVID-19 disease. A first group of 58 patients was treated with the standard treatment (CONTROL group) and a second group was treated following the NEGBAL protocol (NEGBAL group). At this stage, we analyzed data from both populations as to inquire whether there was any statistically significant difference between them, according to the variables under observation.

The variables analyzed were: AGE, WEIGHT, SEX (F or M), vaccination status for 1<sup>st</sup> and 2<sup>nd</sup> doses (yes or no), OBESITY (yes or no), DBT (diabetes, yes or no), EPOC (EPOC or tabaquism, yes or no), CARDIOP (cardiopathy, yes or no), HR (heart rate), SBP (systolic blood pressure), DBP (diastolic blood pressure), TEMP (temperature), RR (respiratory rate), APACHE (acute physiology and chronic health evaluation score), BMI (body mass index),  $PO_2$ ,  $FiO_2$ ,  $PaFiO_2$ ,  $P_{CO2}$ ,  $HCO_3$ , CREAT (creatinine), LYMP (lymphocytes)<sup>1</sup>, NAP, HTO, AHT (yes or no), BNP, TROPO, TGO, TGP, FAL, BIT, BID.

Below, the references NEGBAL and CONTROL refer to which group the variable under consideration belongs and ADM means that the value of the variable was observed at the moment of admission.

## 2 Statistical model

The comparison between numerical variables was done by Welch's two samples  $t$  test with null hypothesis that the difference of the means equals 0. The comparison between categorical variables was done mostly via a Person's  $\chi^2$  test, except for the case of the CARDIOP variable, for which a Fisher's test was used.

## 3 Results

The results of the statistical analysis are displayed below. For each numerical variable two tables and one plot are provided: the corresponding statistical summary (IQR standing for interquartile range and sd for standard deviation) for the CONTROL and BLANEG groups and the  $t$  test for difference of the means and the boxplot for both samples. For the categorical variables, a contingency table is provided, and on its caption the result of the  $\chi^2$  test (Fisher in the case of CARDIOP).

<sup>1</sup>Data for one patient presenting extreme values was eliminated from this analysis by clinical consideration (leukemoid reaction).

Table S1: AGE summary

| <b>AGE</b>   |                        |                        |
|--------------|------------------------|------------------------|
|              | CONTROL GROUP (N = 58) | NEGBAL GROUP (N = 58)  |
| minimum      | 27.00                  | 22.00                  |
| median (IQR) | 62.5 (49.25, 68.75)    | 57.5.00 (48.00, 73.75) |
| mean (sd)    | 59.45 $\pm$ 12.04      | 59.86 $\pm$ 15.14      |
| maximum      | 78.00                  | 91.00                  |

Figure S1: Boxplot for AGE

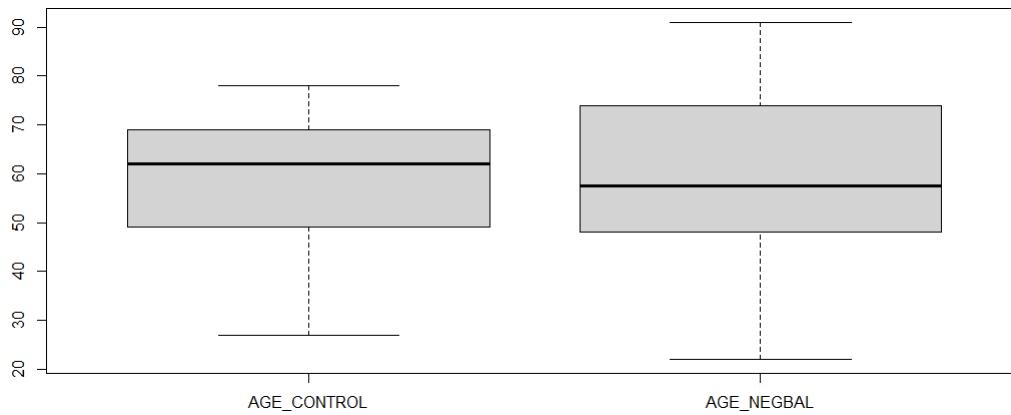Table S2: Paired differences *t*-test between AGE CONTROL and AGE NEGBAL.

| <b>AGE CONTROL v AGE BALNEG</b> |        |                 |                         |                                 |
|---------------------------------|--------|-----------------|-------------------------|---------------------------------|
| <i>t</i>                        | DF     | <i>p</i> -value | 95% confidence interval | sample estimates (respectively) |
| -0.16294                        | 108.49 | 0.8709          | [-5.447341, 4.619755]   | 59.44828 59.86207               |

Table S3: WEIGHT summary

| <b>WEIGHT</b> |                        |                       |
|---------------|------------------------|-----------------------|
|               | CONTROL GROUP (N = 58) | NEGBAL GROUP (N = 58) |
| minimum       | 50.00                  | 50.00                 |
| median (IQR)  | 85 (100, 74.5)         | 84.5 (74.25, 99.00)   |
| mean (sd)     | 87.33 $\pm$ 19.4       | 87.2 $\pm$ 17.93      |
| maximum       | 130.00                 | 136.00                |

Table S4: Paired differences *t*-test between WEIGHT CONTROL and WEIGHT NEGBAL

| <b>WEIGHT CONTROL v WEIGHT NEGBAL</b> |       |                 |                         |                                 |
|---------------------------------------|-------|-----------------|-------------------------|---------------------------------|
| <i>t</i>                              | DF    | <i>p</i> -value | 95% confidence interval | sample estimates (respectively) |
| 0.036534                              | 113.3 | 0.9709          | [-6.745129, 6.998578]   | 87.32759 87.20086               |

Figure S2: Boxplot for WEIGHT

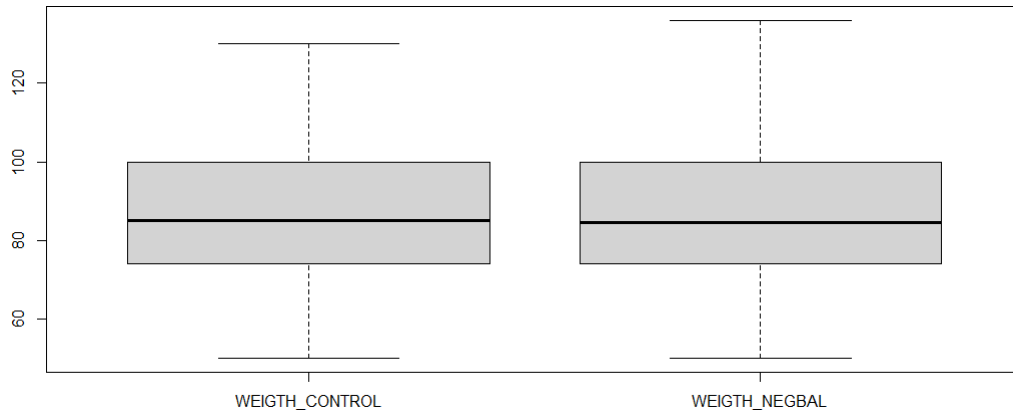

Table S5: SEX frequencies

|         | F  | M  |
|---------|----|----|
| CONTROL | 18 | 40 |
| NEGBAL  | 22 | 36 |

Table S6: Pearson's Chi-squared test (Yates' continuity correction):  $\chi^2 = 0.34342$ ,  $df = 1$ ,  $p$ -value = 0.5579

Table S7: COVID vaccine, 1<sup>st</sup> dose frequencies

|         | Yes | No |
|---------|-----|----|
| CONTROL | 18  | 40 |
| NEGBAL  | 34  | 24 |

Table S8: Pearson's Chi-squared test (Yates' continuity correction):  $\chi^2 = 7.8425$ ,  $df = 1$ ,  $p$ -value = 0.005103

Table S9: COVID vaccine, 2<sup>nd</sup> dose frequencies

|         | Yes | No |
|---------|-----|----|
| CONTROL | 5   | 53 |
| NEGBAL  | 22  | 36 |

Table S10: Pearson's Chi-squared test (Yates' continuity correction):  $\chi^2 = 12.358$ ,  $df = 1$ ,  $p$ -value = 0.0004391

Table S11: OBESITY frequencies

|         | Yes | No |
|---------|-----|----|
| CONTROL | 30  | 28 |
| NEGBAL  | 29  | 29 |

Table S12: Pearson's Chi-squared test (Yates' continuity correction):  $\chi^2=0$ ,  $df=1$ ,  $p$ -value = 1

Table S13: HTA frequencies

|         | Yes | No |
|---------|-----|----|
| CONTROL | 23  | 35 |
| NEGBAL  | 24  | 34 |

Table S14: Pearson's Chi-squared test (Yates' continuity correction):  $\chi^2=0$ ,  $df=1$ ,  $p$ -value = 1

Table S15: DBT frequencies

|         | Yes | No |
|---------|-----|----|
| CONTROL | 17  | 41 |
| NEGBAL  | 13  | 45 |

Table S16: Pearson's Chi-squared test (Yates' continuity correction):  $\chi^2=0.40465$ ,  $df=1$ ,  $p$ -value = 0.5247

Table S17: EPOC frequencies

|         | Yes | No |
|---------|-----|----|
| CONTROL | 10  | 48 |
| NEGBAL  | 10  | 47 |

Table S18: Pearson's Chi-squared test (Yates' continuity correction):  $\chi^2=1.3287 \times 10^{-31}$ ,  $df=1$ ,  $p$  value = 0.5247

Table S19: CARDIOP frequencies

|         | Yes | No |
|---------|-----|----|
| CONTROL | 4   | 54 |
| NEGBAL  | 0   | 58 |

Table S20: Fisher's Exact Test:  $p$ -value = 0.1185, 95% percent confidence interval: [0, 1.482778]

Table S21: HR ADM summary.

| <b>HR</b>    |                        |                       |
|--------------|------------------------|-----------------------|
|              | CONTROL GROUP (N = 58) | NEGBAL GROUP (N = 58) |
| minimum      | 56.00                  | 53.00                 |
| median (IQR) | 83.5 (75.00, 96.00)    | 81.00 (71.25, 94.75)  |
| mean (sd)    | 84.55 $\pm$ 14.9       | 82.5 $\pm$ 15.19      |
| maximum      | 120.00                 | 118.00                |

Table S22: Paired differences t-test between HR ADM CONTROL and HR ADM NEGBAL

| <b>HR ADM CONTROL v HR ADM NEGBAL</b> |        |                 |                         |                                 |          |
|---------------------------------------|--------|-----------------|-------------------------|---------------------------------|----------|
| <i>t</i>                              | DF     | <i>p</i> -value | 95% confidence interval | sample estimates (respectively) |          |
| 0.73446                               | 113.96 | 0.4642          | [-3.482200, 7.585648]   | 84.55172                        | 82.50000 |

Figure S3: Boxplot for HR ADM.

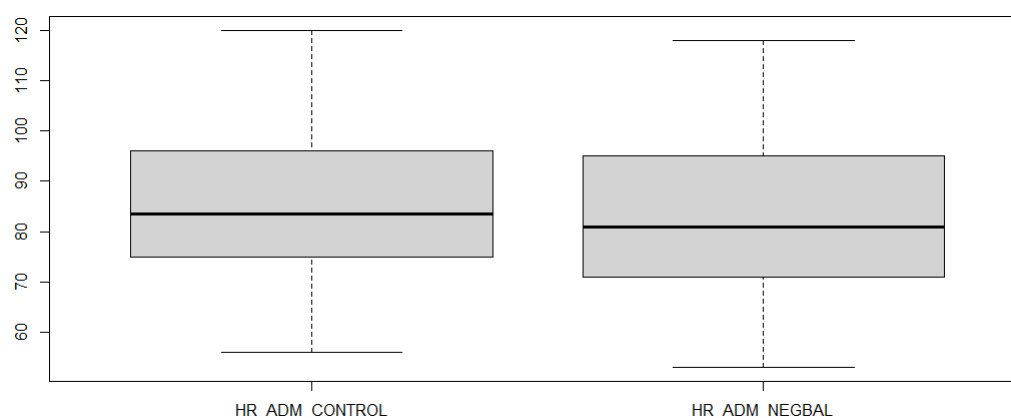

Table S23: SBP ADM summary

| <b>SBP</b>   |                        |                         |
|--------------|------------------------|-------------------------|
|              | CONTROL GROUP (N = 58) | NEGBAL GROUP (N = 58)   |
| minimum      | 93.00                  | 95.00                   |
| median (IQR) | 121.00 (115.00, 134.8) | 126.00 (120.00, 138.00) |
| mean (sd)    | 127.2 $\pm$ 20.77      | 128.3 $\pm$ 17.75       |
| maximum      | 223.00                 | 173.00                  |

Figure S4: Boxplot for SBP ADM.

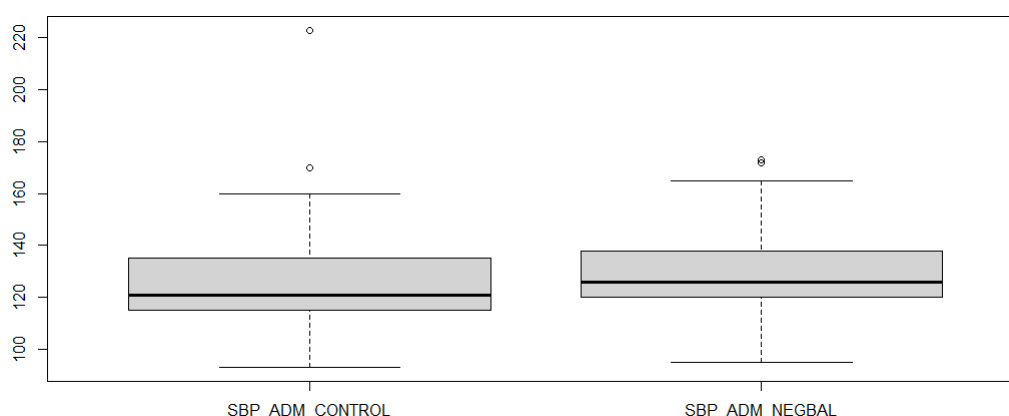

Table S24: Paired differences  $t$ -test between SBP ADM CONTROL and SBP ADM NEGBAL.

| SBP ADM CONTROL v SBP ADM NEGBAL |       |            |                         |                                 |
|----------------------------------|-------|------------|-------------------------|---------------------------------|
| $t$                              | DF    | $p$ -value | 95% confidence interval | sample estimates (respectively) |
| -0.30757                         | 111.3 | 0.759      | [-3.482200, 7.585648]   | 127.2241 128.3276               |

Table S25: DBP ADM summary

| DBP          |                        |                       |
|--------------|------------------------|-----------------------|
|              | CONTROL GROUP (N = 58) | NEGBAL GROUP (N = 58) |
| minimum      | 44.00                  | 58.00                 |
| median (IQR) | 76.00 (70.00, 84.00)   | 79.00 (70.00, 85.75)  |
| mean (sd)    | 76.79 $\pm$ 12.47      | 78.14 $\pm$ 12.4      |
| maximum      | 115.00                 | 105.00                |

Figure S5: Boxplot for DBP ADM.

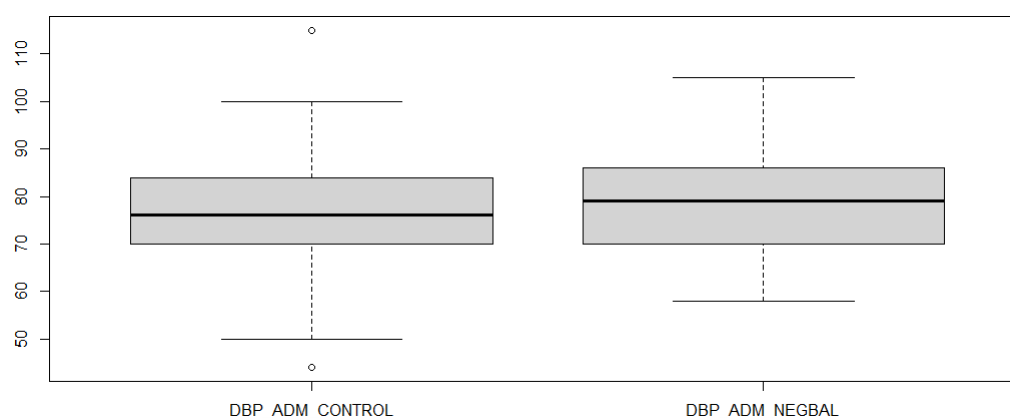

Table S26: Paired differences  $t$ -test between DBP ADM CONTROL and DBP ADM NEGBAL.

| DBP ADM CONTROL v DBP ADM NEGBAL |     |            |                         |                                 |
|----------------------------------|-----|------------|-------------------------|---------------------------------|
| $t$                              | DF  | $p$ -value | 95% confidence interval | sample estimates (respectively) |
| -0.58225                         | 114 | 0.5615     | [-5.920307, 3.230652]   | 76.79310 78.13793               |



Table S27: TEMP ADM summary

| <b>TEMP</b>  |                        |                       |
|--------------|------------------------|-----------------------|
|              | CONTROL GROUP (N = 58) | NEGBAL GROUP (N = 58) |
| minimum      | 35.00                  | 35.00                 |
| median (IQR) | 36.4 (36.00, 37.38)    | 36.25 (36.00, 36.9)   |
| mean (sd)    | 36.63 $\pm$ 0.88       | 36.43 $\pm$ 0.84      |
| maximum      | 38.2                   | 39.00                 |

Figure S6: Boxplot for TEMP.ADM.

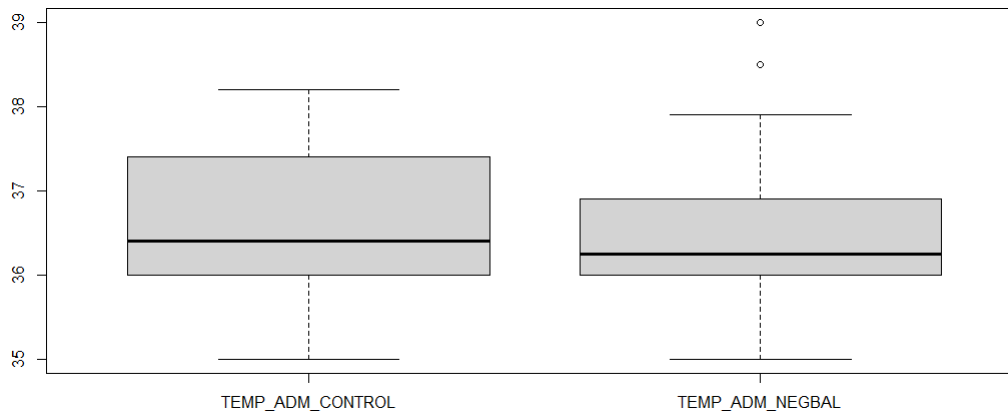Table S28: Paired differences *t*-test between TEMP ADM CONTROL and TEMP ADM NEGBAL.

| <b>TEMP ADM CONTROL v TEMP ADM NEGBAL</b> |        |                 |                         |                                 |
|-------------------------------------------|--------|-----------------|-------------------------|---------------------------------|
| <i>t</i>                                  | DF     | <i>p</i> -value | 95% confidence interval | sample estimates (respectively) |
| 1.2882                                    | 113.78 | 0.2003          | [-0.1103479, 0.5206927] | 36.63276 36.42759               |

Table S29: RR ADM summary.

| <b>RR</b>    |                        |                       |
|--------------|------------------------|-----------------------|
|              | CONTROL GROUP (N = 58) | NEGBAL GROUP (N = 58) |
| minimum      | 16.00                  | 13.00                 |
| median (IQR) | 25.00 (22.00, 28.00)   | 25.00 (22.00, 26.00)  |
| mean (sd)    | 25.34 $\pm$ 4.61       | 24.47 $\pm$ 4.56      |
| maximum      | 40.00                  | 35.00                 |

Table S30: Paired differences *t*-test between RR ADM CONTROL and RR ADM NEGBAL

| <b>RR ADM CONTROL v RR ADM NEGBAL</b> |        |                 |                         |                                 |
|---------------------------------------|--------|-----------------|-------------------------|---------------------------------|
| <i>t</i>                              | DF     | <i>p</i> -value | 95% confidence interval | sample estimates (respectively) |
| 1.033                                 | 113.99 | 0.3038          | [-0.8069831, 2.5656038] | 25.34483 24.46552               |

Table S31: APACHE ADM summary

| APACHE       |                        |                       |
|--------------|------------------------|-----------------------|
|              | CONTROL GROUP (N = 58) | NEGBAL GROUP (N = 58) |
| minimum      | 3.00                   | 3.00                  |
| median (IQR) | 8.00 (5.00, 9.00)      | 8.00 (6.00, 10.75)    |
| mean (sd)    | 7.6 $\pm$ 3.04         | 8.43 $\pm$ 3.44       |
| maximum      | 15.00                  | 21.00                 |

Figure S7: Boxplot for RR ADM.

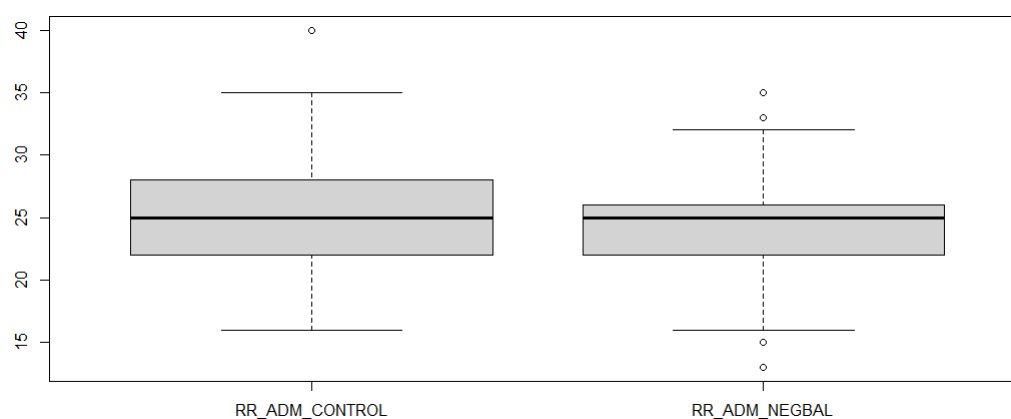

Figure S8: Boxplot for APACHE ADM.

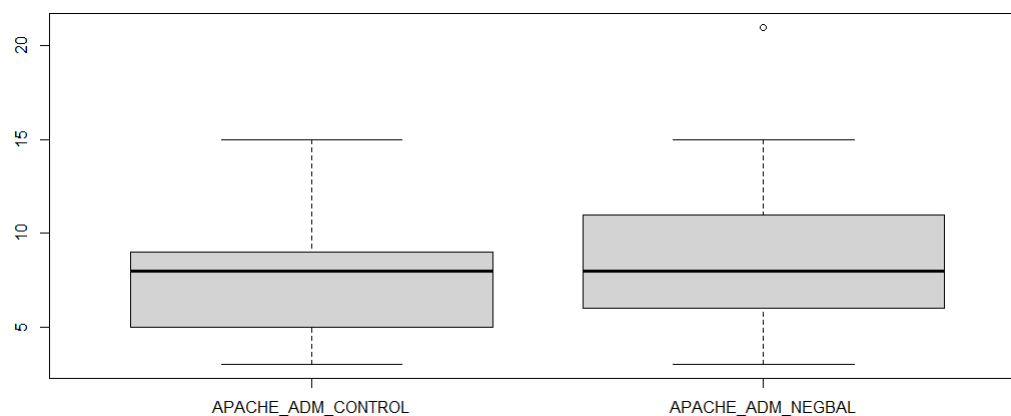Table S32: Paired differences  $t$ -test between APACHE ADM CONTROL and APACHE ADM NEGBAL

| APACHE ADM CONTROL v APACHE ADM NEGBAL |       |            |                         |                                 |          |
|----------------------------------------|-------|------------|-------------------------|---------------------------------|----------|
| $t$                                    | DF    | $p$ -value | 95% confidence interval | sample estimates (respectively) |          |
| -1.033                                 | 112.3 | 0.173      | [-2.0233185, 0.3681461] | 7.603448                        | 8.431034 |

Table S33: BMI summary.

| <b>BMI</b>   |                        |                       |
|--------------|------------------------|-----------------------|
|              | CONTROL GROUP (N = 58) | NEGBAL GROUP (N = 58) |
| minimum      | 19.00                  | 22.00                 |
| median (IQR) | 29.5 (26, 33.75)       | 30.00 (26.00, 33.00)  |
| mean (sd)    | 30.25 $\pm$ 5.46       | 29.93 $\pm$ 4.89      |
| maximum      | 42.00                  | 41.00                 |

Figure S9: Boxplot for BMI.

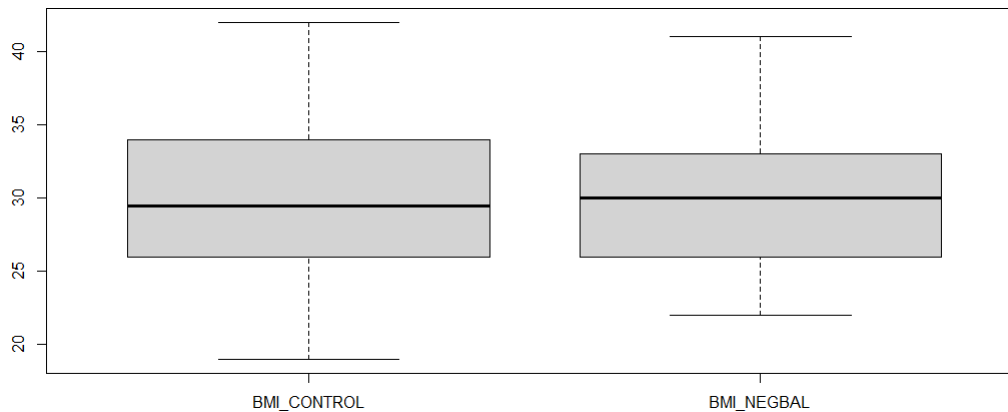Table S34: Paired differences *t*-test between BMI CONTROL and BMI NEGBAL.

| <b>BMI CONTROL v BMI.NEGBAL</b> |        |                 |                         |                                 |
|---------------------------------|--------|-----------------|-------------------------|---------------------------------|
| <i>t</i>                        | DF     | <i>p</i> -value | 95% confidence interval | sample estimates (respectively) |
| 0.3318                          | 112.57 | 0.7407          | [ -1.585684, 2.223615]  | 30.25000 29.93103               |

Table S35: PO<sub>2</sub> ADM summary

| <b>PO<sub>2</sub> ADM</b> |                        |                       |
|---------------------------|------------------------|-----------------------|
|                           | CONTROL GROUP (N = 58) | NEGBAL GROUP (N = 58) |
| minimum                   | 43.00                  | 49.00                 |
| median (IQR)              | 68.45 (60.33, 79.22)   | 69.5 (61.85, 81.75)   |
| mean (sd)                 | 73.99 $\pm$ 21.55      | 72.8 $\pm$ 15.97      |
| maximum                   | 149.6                  | 135.00                |

Table S36: Paired differences *t*-test between PO<sub>2</sub> ADM CONTROL and PO<sub>2</sub> ADM NEGBAL

| <b>PO<sub>2</sub> ADM CONTROL v PO<sub>2</sub> ADM NEGBAL</b> |       |                 |                         |                                 |
|---------------------------------------------------------------|-------|-----------------|-------------------------|---------------------------------|
| <i>t</i>                                                      | DF    | <i>p</i> -value | 95% confidence interval | sample estimates (respectively) |
| 0.33829                                                       | 105.1 | 0.7358          | [ -5.791514, 8.174272]  | 73.98793 72.79655               |

Figure S10: Boxplot for PO<sub>2</sub> ADM

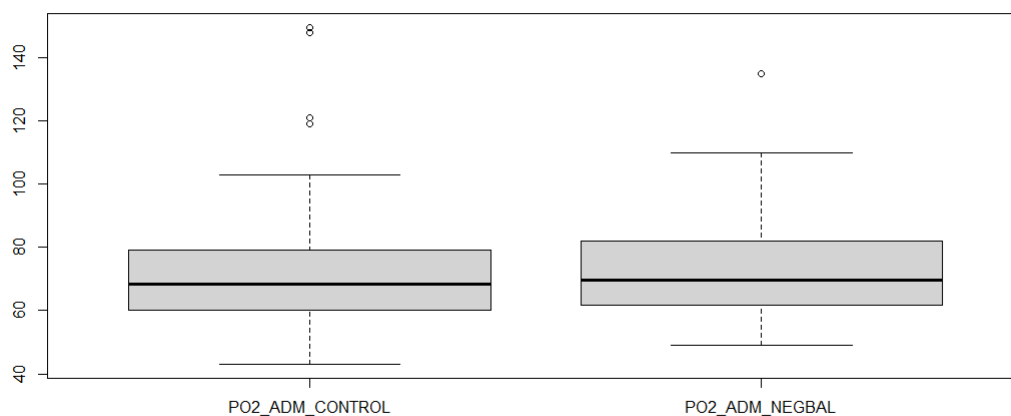

Table S37: FiO<sub>2</sub> ADM summary.

| FiO <sub>2</sub> ADM |                        |                       |
|----------------------|------------------------|-----------------------|
|                      | CONTROL GROUP (N = 58) | NEGBAL GROUP (N = 58) |
| minimum              | 0.24                   | 0.28                  |
| median (IQR)         | 0.45 (0.32, 0.70)      | 0.40 (0.32, 0.70)     |
| mean (sd)            | 0.53 ± 0.23            | 0.53 ± 0.26           |
| maximum              | 1.00                   | 1.00                  |

Figure S11: Boxplot for FiO<sub>2</sub> ADM.

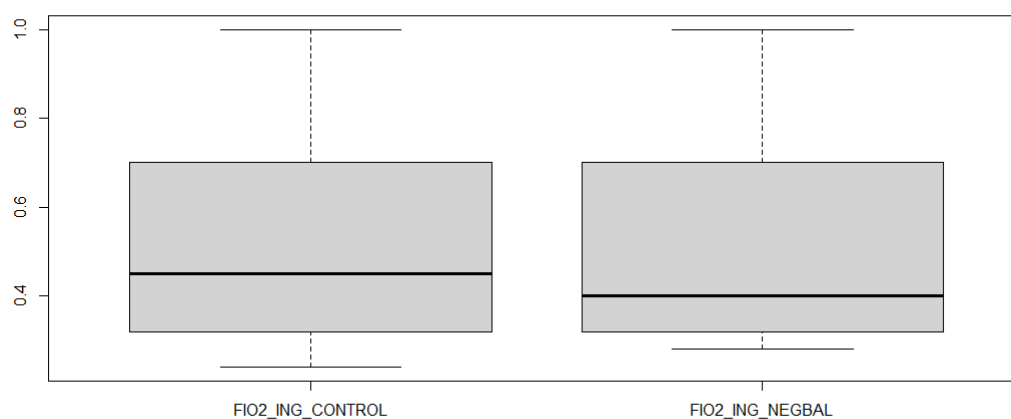

Table S38: Paired differences *t*-test between FiO<sub>2</sub> ADM CONTROL and FiO<sub>2</sub> ADM NEGBAL.

| FiO <sub>2</sub> ADM CONTROL v FiO <sub>2</sub> ADM NEGBAL |        |                 |                           |                                 |
|------------------------------------------------------------|--------|-----------------|---------------------------|---------------------------------|
| <i>t</i>                                                   | DF     | <i>p</i> -value | 95% confidence interval   | sample estimates (respectively) |
| -0.030253                                                  | 112.41 | 0.9759          | [-0.09171093, 0.08895231] | 0.5324138 0.5337931             |



Table S39: PaFiO<sub>2</sub> ADM summary

| <b>PaFiO<sub>2</sub> ADM</b> |                        |                         |
|------------------------------|------------------------|-------------------------|
|                              | CONTROL GROUP (N = 58) | NEGBAL GROUP (N = 58)   |
| minimum                      | 57.00                  | 54.00                   |
| median (IQR)                 | 152.50 (97.85, 228.37) | 167.20 (102.30, 221.20) |
| mean (sd)                    | 164.81 ± 73.64         | 163.6 ± 67.26           |
| maximum                      | 297.92                 | 281.6                   |

Figure S12: Boxplot for PaFiO<sub>2</sub> ADM.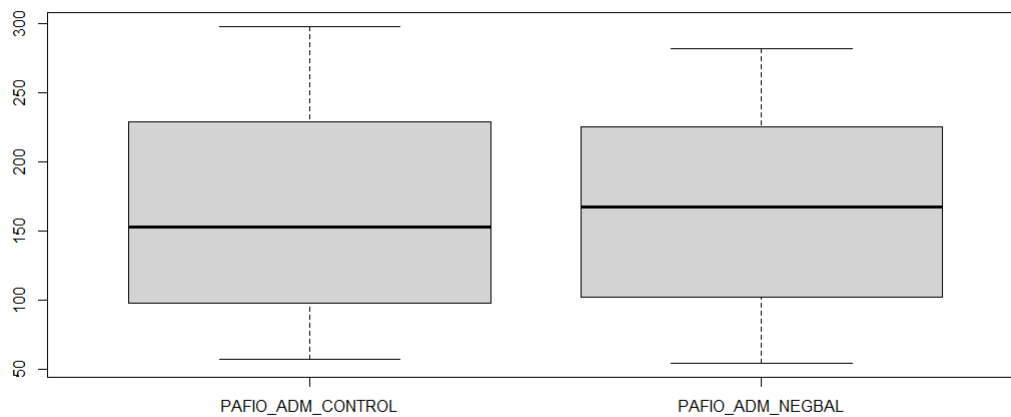Table S40: Paired differences *t*-test between PaFiO<sub>2</sub> ADM CONTROL and PaFiO<sub>2</sub> ADM NEGBAL.

| <b>PaFiO<sub>2</sub> ADM CONTROL v PaFiO<sub>2</sub> ADM NEGBAL</b> |        |                 |                         |                                 |
|---------------------------------------------------------------------|--------|-----------------|-------------------------|---------------------------------|
| <i>t</i>                                                            | DF     | <i>p</i> -value | 95% confidence interval | sample estimates (respectively) |
| 0.095144                                                            | 113.07 | 0.9244          | [-24.69880, 27.19075]   | 164.8064 163.5604               |

Table S41: *P*<sub>CO2</sub> ADM summary.

| <b><i>P</i><sub>CO2</sub> ADM</b> |                        |                       |
|-----------------------------------|------------------------|-----------------------|
|                                   | CONTROL GROUP (N = 58) | NEGBAL GROUP (N = 58) |
| minimum                           | 17.00                  | 20.40                 |
| median (IQR)                      | 33.50 (30.25, 35.00)   | 33.00 (29.85,35.00)   |
| mean (sd)                         | 33.75 ± 5.40           | 32.81 ± 4.90          |
| maximum                           | 48.00                  | 50.00                 |

Figure S13: Boxplot for  $P_{CO2}$  -ADM.

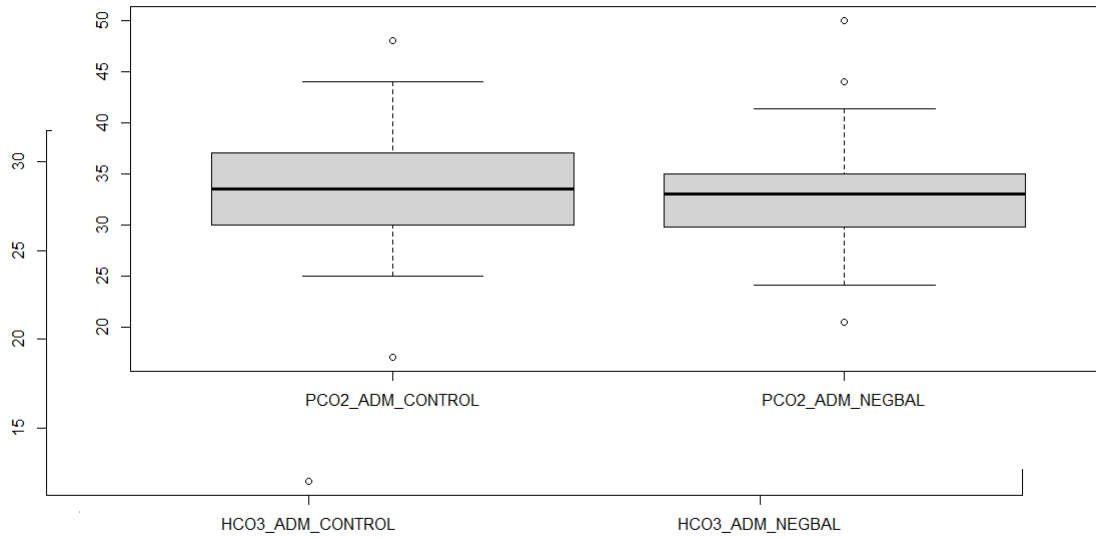

Table S42: Paired differences  $t$ -test between  $P_{CO2}$  ADM CONTROL and  $P_{CO2}$  ADM NEGBAL.

| $P_{CO2}$ ADM CONTROL v $P_{CO2}$ ADM NEGBAL |        |            |                         |                                 |
|----------------------------------------------|--------|------------|-------------------------|---------------------------------|
| $t$                                          | DF     | $p$ -value | 95% confidence interval | sample estimates (respectively) |
| 0.98508                                      | 112.92 | 0.3267     | [-0.9536765, 2.8398834] | 33.74828 32.80517               |

Table S43:  $HCO_3$  ADM summary.

| $HCO_3$ ADM  |                        |                       |
|--------------|------------------------|-----------------------|
|              | CONTROL GROUP (N = 58) | NEGBAL GROUP (N = 58) |
| minimum      | 12.00                  | 15.10                 |
| median (IQR) | 21.50 (20.00, 23.00)   | 22.00 (20.02,23.80)   |
| mean (sd)    | 21.64 $\pm$ 3.01       | 23.14 $\pm$ 3.12      |
| maximum      | 31.00                  | 30.00                 |

Table S44: Paired differences  $t$ -test between  $HCO_3$  ADM CONTROL and  $HCO_3$  ADM NEGBAL.

| $HCO_3$ ADM CONTROL v $HCO_3$ ADM NEGBAL |        |            |                         |                                 |
|------------------------------------------|--------|------------|-------------------------|---------------------------------|
| $t$                                      | DF     | $p$ -value | 95% confidence interval | sample estimates (respectively) |
| -0.86919                                 | 113.86 | 0.3866     | [-1.6226207, 0.6329655] | 21.64483 22.13966               |

Figure S14: Boxplot for  $HCO_3$ -ADM.

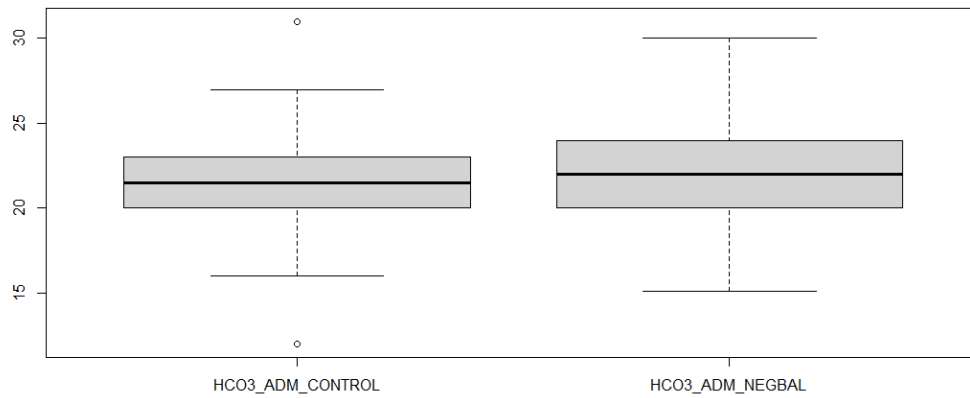

Table S45: CREAT ADM summary

| CREAT ADM    |                        |                       |
|--------------|------------------------|-----------------------|
|              | CONTROL GROUP (N = 58) | NEGBAL GROUP (N = 58) |
| minimum      | 5.40                   | 5.20                  |
| median (IQR) | 8.95 (8.02, 10.25)     | 8.25 (7.02,10.20)     |
| mean (sd)    | 9.41 $\pm$ 2.38        | 8.75 $\pm$ 2.01       |
| maximum      | 15.30                  | 13.10                 |

Figure S15: Boxplot for CREAT.ADM.

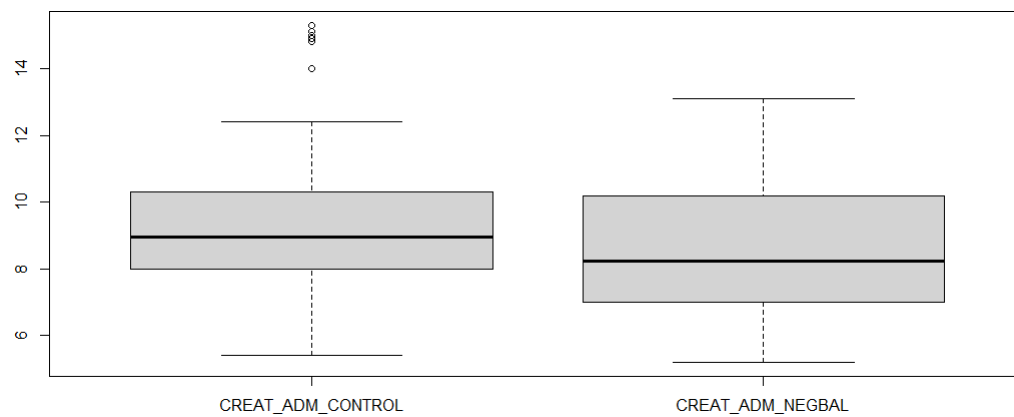

Table S46: Paired differences  $t$ -test between CREAT ADM CONTROL and CREAT ADM NEGBAL.

| CREAT ADM CONTROL v CREAT ADM NEGBAL |        |            |                         |                                 |
|--------------------------------------|--------|------------|-------------------------|---------------------------------|
| $t$                                  | DF     | $p$ -value | 95% confidence interval | sample estimates (respectively) |
| 1.6081                               | 110.81 | 0.1107     | [-0.1529826, 1.4702240] | 9.408621 8.750000               |



Table S47: LYMP ADM summary.

| <b>LYMP ADM</b> |                        |                       |
|-----------------|------------------------|-----------------------|
|                 | CONTROL GROUP (N = 58) | NEGBAL GROUP (N = 57) |
| minimum         | 174.0                  | 122.0                 |
| median (IQR)    | 841.5 (570.2, 1150.8)  | 885.0 (607.0,1200.0)  |
| mean (sd)       | 963.8 $\pm$ 773.0662   | 955.5 $\pm$ 540.31    |
| maximum         | 5773.0                 | 3700.0                |

Table S48: LYMP D4 summary.

| <b>LYMP D4</b> |                        |                       |
|----------------|------------------------|-----------------------|
|                | CONTROL GROUP (N = 56) | NEGBAL GROUP (N = 53) |
| minimum        | 183.0                  | 153.0                 |
| median (IQR)   | 642.5 (434.0, 795.0)   | 946.0 (608.0,1300.0)  |
| mean (sd)      | 697.1 $\pm$ 402.4488   | 1056.00 $\pm$ 735.1   |
| maximum        | 2059.0                 | 4964                  |

#### 4 Data for the whole population

Table S49: Paired differences  $t$ -test between LYMP ADM CONTROL and LYMP D4 CONTROL

| <b>LYMP ADM CONTROL v LYMP D4 CONTROL</b> |        |            |                         |                                 |
|-------------------------------------------|--------|------------|-------------------------|---------------------------------|
| $t$                                       | DF     | $p$ -value | 95% confidence interval | sample estimates (respectively) |
| 2.3225                                    | 86.432 | 0.02256    | [38.44399, 495.13852]   | 963.8448 697.0536               |

Figure S16: Boxplot for LYMP ADM v LYMP D4 for CONTROL group.

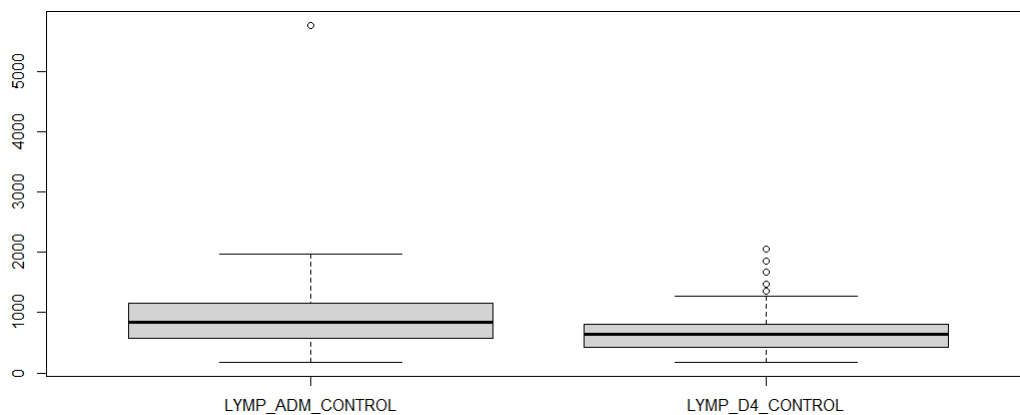

Figure S17: Boxplot for LYMP ADM v LYMP D4 for NEGBAL group.

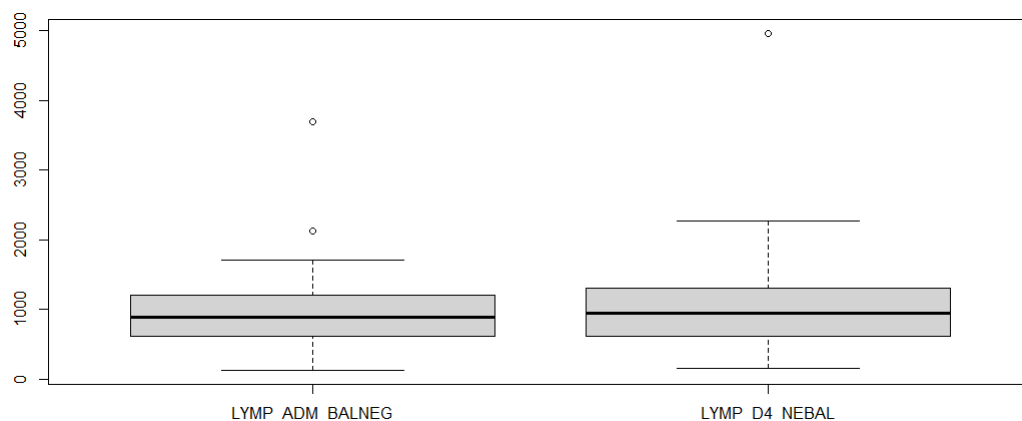

Table S50: Paired differences  $t$ -test between LYMP ADM NEGBAL and LYMP D4 NEGBAL.

| <b>LYMP ADM NEGBAL v LYMP D4 NEGBAL</b> |        |            |                         |                                 |
|-----------------------------------------|--------|------------|-------------------------|---------------------------------|
| $t$                                     | DF     | $p$ -value | 95% confidence interval | sample estimates (respectively) |
| -0.80878                                | 95.085 | 0.4207     | [-345.7983, 145.6030]   | 955.5439 1055.6415              |

Table S51: Paired differences  $t$ -test between LYMP ADM CONTROL and LYMP ADM NEGBAL

| <b>LYMP ADM CONTROL v LYMP ADM NEGBAL</b> |        |            |                         |                                 |
|-------------------------------------------|--------|------------|-------------------------|---------------------------------|
| $t$                                       | DF     | $p$ -value | 95% confidence interval | sample estimates (respectively) |
| 0.066835                                  | 102.08 | 0.9468     | [-238.0483, 254.6502]   | 963.8448 955.5439               |

Figure S18: Boxplot for LYMP ADM CONTROL v NEGBAL group.

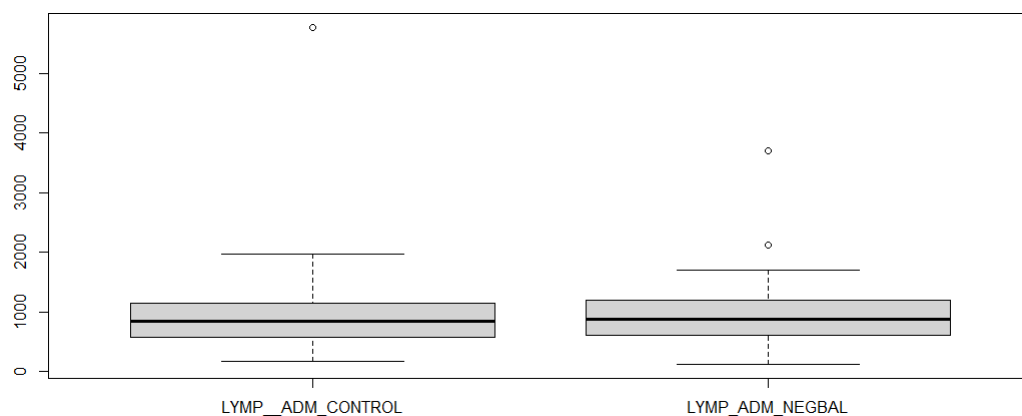

Figure S19: Boxplot for LYMP D4 CONTROL v NEGBAL group.

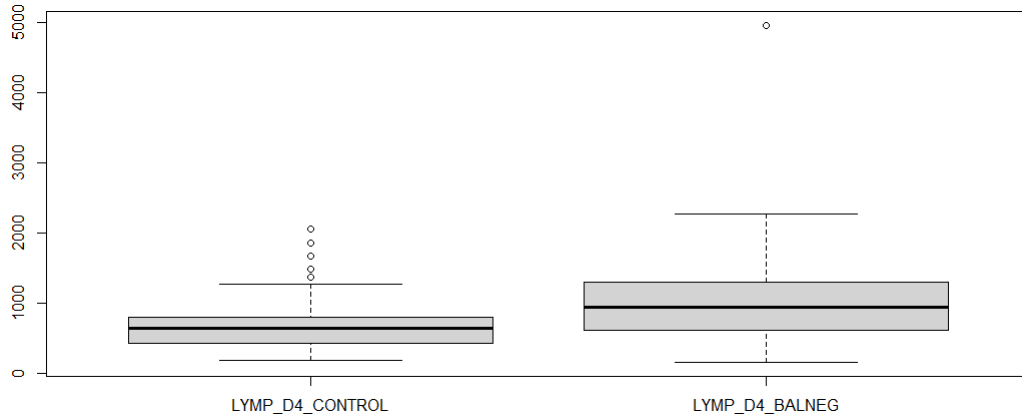

Table S52: Paired differences  $t$ -test between LYMP D4 CONTROL and LYMP D4 NEGBAL.

| <b>LYMP.D4 CONTROL v LYMP.D4 NEGBAL</b> |        |            |                         |                                 |
|-----------------------------------------|--------|------------|-------------------------|---------------------------------|
| $t$                                     | DF     | $p$ -value | 95% confidence interval | sample estimates (respectively) |
| -3.1344                                 | 79.628 | 0.002411   | [-586.2735, -130.9024]  | 697.0536 1055.6415              |

Table S53: NAP ADM summary.

| <b>NAP ADM</b> |                         |                        |
|----------------|-------------------------|------------------------|
|                | CONTROL GROUP (N = 58)  | NEGBAL GROUP (N = 58)  |
| minimum        | 128.00                  | 126.00                 |
| median (IQR)   | 136.00 (134.20, 139.00) | 136.00 (134.00,137.80) |
| mean (sd)      | 136.30 $\pm$ 135.50     | 3.30 $\pm$ 2.01        |
| maximum        | 144.00                  | 142.00                 |

Figure S20: Boxplot for NAP.ADM.

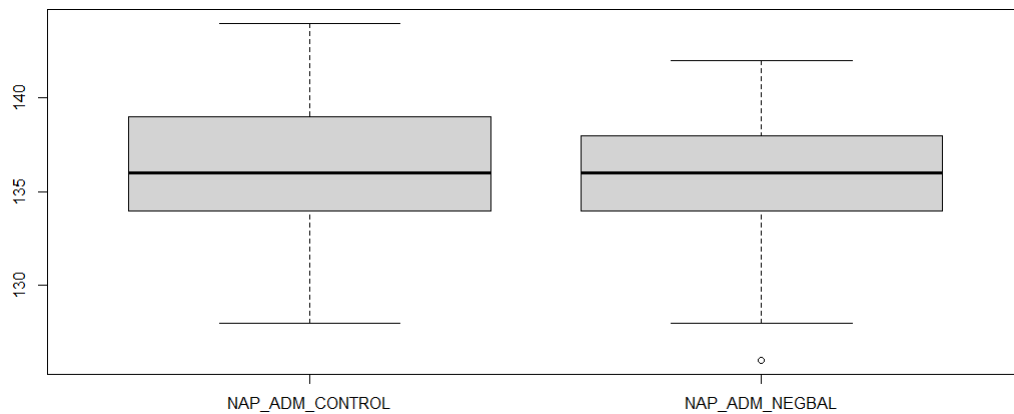

Table S54: Paired differences  $t$ -test between NAP ADM CONTROL and NAP ADM NEGBAL.

| <b>NAP ADM CONTROL v NAP ADM NEGBAL</b> |        |            |                         |                                 |
|-----------------------------------------|--------|------------|-------------------------|---------------------------------|
| $t$                                     | DF     | $p$ -value | 95% confidence interval | sample estimates (respectively) |
| 1.3427                                  | 113.69 | 0.182      | [-0.4016602, 2.0913153] | 136.3103 135.4655               |

Table S55: HTO ADM summary.

| <b>HTO ADM</b> |                        |                       |
|----------------|------------------------|-----------------------|
|                | CONTROL GROUP (N = 58) | NEGBAL GROUP (N = 58) |
| minimum        | 26.00                  | 25.00                 |
| median (IQR)   | 40.80 (38.20,43.90)    | 40.00 (36.92,42.30)   |
| mean (sd)      | 40.38 $\pm$ 5.22       | 39.20 $\pm$ 4.54      |
| maximum        | 52.00                  | 45.00                 |

Table S56: Paired differences  $t$ -test between HTO ADM CONTROL and HTO ADM NEGBAL

| <b>HTO ADM CONTROL v HTO ADM NEGBAL</b> |        |            |                         |                                 |
|-----------------------------------------|--------|------------|-------------------------|---------------------------------|
| $t$                                     | DF     | $p$ -value | 95% confidence interval | sample estimates (respectively) |
| 1.294                                   | 111.84 | 0.1983     | [-0.6247027, 2.9764269] | 40.37931 39.20345               |

Figure S21: Boxplot for HTO ADM.

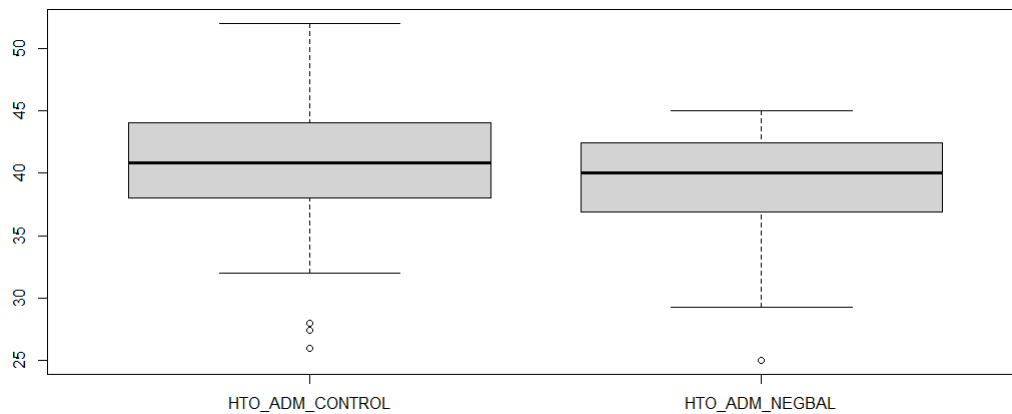

Table S57: AHT frequencies

|         | Yes | No |
|---------|-----|----|
| CONTROL | 24  | 34 |
| NEGBAL  | 23  | 35 |

Table S58: Pearson's Chi-squared test (Yates' continuity correction):  $\chi^2 = 0$ ,  $df = 1$ ,  $p$ -value = 1

Table S59: BNP ADM summary.

| <b>BNP ADM</b> |                        |                       |
|----------------|------------------------|-----------------------|
|                | CONTROL GROUP (N = 31) | NEGBAL GROUP (N = 45) |
| minimum        | 10                     | 5                     |
| median (IQR)   | 218 (90,427)           | 80 (35,280)           |
| mean (sd)      | 277 ± 246.19           | 188.80 ± 222.86       |
| maximum        | 850                    | 873                   |

Table S60: Paired differences *t*-test between BNP ADM CONTROL and BNP ADM NEGBAL

| <b>BNP ADM CONTROL v BNP ADM NEGBAL</b> |        |                 |                         |                                 |
|-----------------------------------------|--------|-----------------|-------------------------|---------------------------------|
| <i>t</i>                                | DF     | <i>p</i> -value | 95% confidence interval | sample estimates (respectively) |
| 1.5941                                  | 60.325 | 0.1161          | [ -22.45233, 198.78136] | 276.9645 188.8000               |

Table S61: TROPO ADM summary.

| <b>TROPO ADM</b> |                        |                       |
|------------------|------------------------|-----------------------|
|                  | CONTROL GROUP (N = 42) | NEGBAL GROUP (N = 45) |
| minimum          | 0.43                   | 3.00                  |
| median (IQR)     | 9.00 (6.00,11.75)      | 7.00 (5.00,12.00)     |
| mean (sd)        | 10.84 ± 8.53           | 9.99 ± 8.25           |
| maximum          | 41.00                  | 41.00                 |

Figure S22: Boxplot for BNP.ADM.

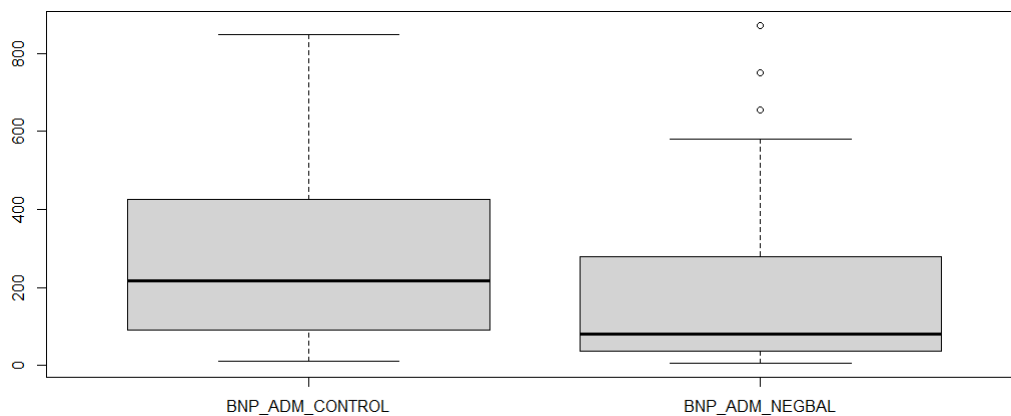

Figure S23: Boxplot for TROPO.ADM.

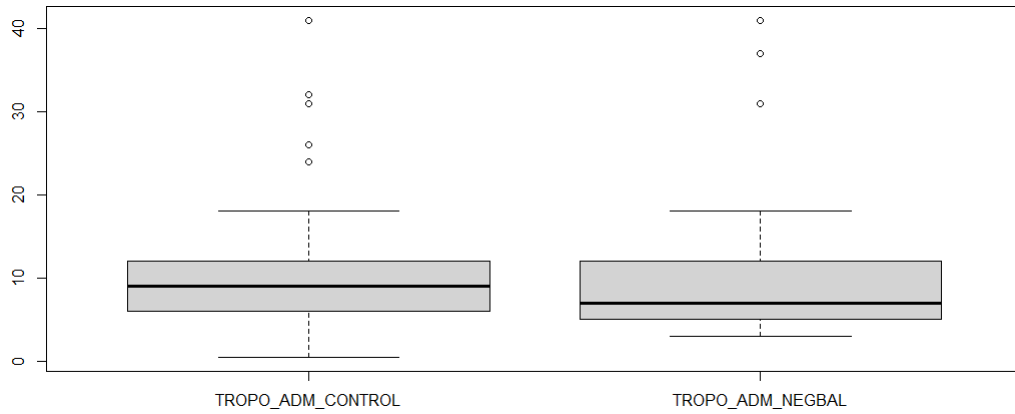

Table S62: Paired differences  $t$ -test between TROPO ADM CONTROL and TROPO ADM NEGBAL.

| <b>TROPO ADM CONTROL v TROPO ADM NEGBAL</b> |        |            |                         |                                 |
|---------------------------------------------|--------|------------|-------------------------|---------------------------------|
| $t$                                         | DF     | $p$ -value | 95% confidence interval | sample estimates (respectively) |
| 0.47087                                     | 84.107 | 0.639      | [-2.734726, 4.431647]   | 10.843571 9.995111              |

Table S63: TGO ADM summary.

| <b>TGO ADM</b> |                        |                       |
|----------------|------------------------|-----------------------|
|                | CONTROL GROUP (N = 49) | NEGBAL GROUP (N = 45) |
| minimum        | 19.00                  | 12.00                 |
| median (IQR)   | 43.00 (29.00,66.00)    | 34.00 (25.00,55.00)   |
| mean (sd)      | 53.84 $\pm$ 38.85      | 45.15 $\pm$ 36.39     |
| maximum        | 211.00                 | 232.00                |

Figure S24: Boxplot for TGO.ADM.

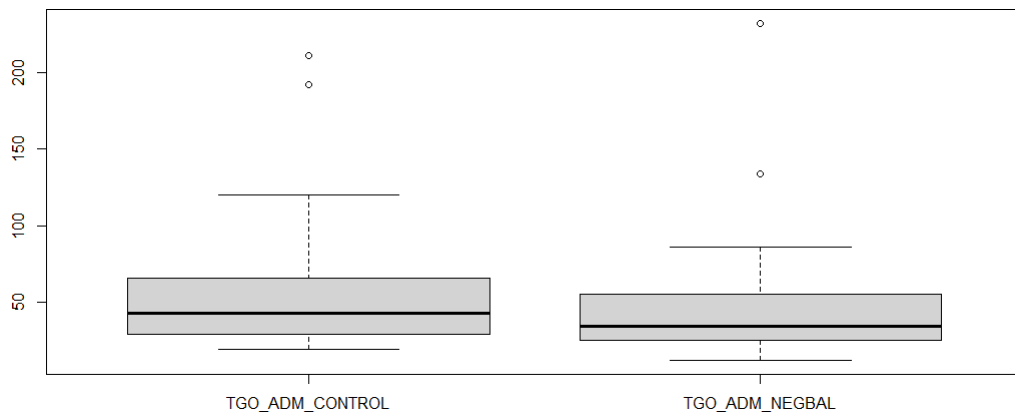

Table S64: Paired differences  $t$ -test between TGO ADM CONTROL and TGO ADM NEGBAL.

| <b>TGO ADM CONTROL v TGO ADM NEGBAL</b> |        |            |                         |                                 |
|-----------------------------------------|--------|------------|-------------------------|---------------------------------|
| $t$                                     | DF     | $p$ -value | 95% confidence interval | sample estimates (respectively) |
| 1.1312                                  | 93.949 | 0.2608     | [-6.560989, 23.936586]  | 53.83673 45.14894               |

Table S65: TGP ADM summary.

| <b>TGP ADM</b> |                        |                       |
|----------------|------------------------|-----------------------|
|                | CONTROL GROUP (N = 49) | NEGBAL GROUP (N = 47) |
| minimum        | 10.00                  | 11.00                 |
| median (IQR)   | 45.00 (26.00,78.00)    | 32.00 (22.00,57.50)   |
| mean (sd)      | 60.69 $\pm$ 64.60      | 53.38 $\pm$ 71.96     |
| maximum        | 449.00                 | 460.00                |

Table S66: Paired differences  $t$ -test between TGP ADM CONTROL and TGP ADM NEGBAL

| <b>TGP ADM CONTROL v TGP ADM NEGBAL</b> |        |            |                         |                                 |
|-----------------------------------------|--------|------------|-------------------------|---------------------------------|
| $t$                                     | DF     | $p$ -value | 95% confidence interval | sample estimates (respectively) |
| 0.54208                                 | 91.948 | 0.5891     | [-20.18191, 35.33432]   | 60.95918 53.38298               |

Figure S25: Boxplot for TGP.ADM.

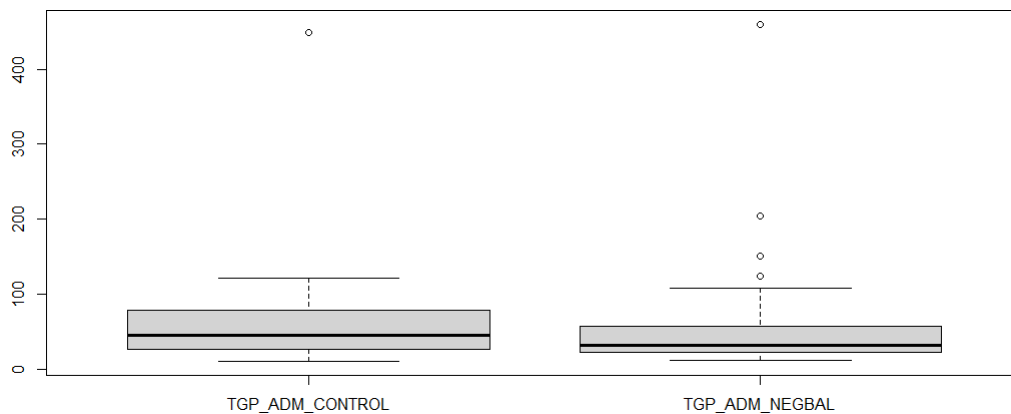

Table S67: FAL ADM summary.

| <b>FAL ADM</b> |                        |                       |
|----------------|------------------------|-----------------------|
|                | CONTROL GROUP (N = 49) | NEGBAL GROUP (N = 46) |
| minimum        | 77.00                  | 60.00                 |
| median (IQR)   | 162.00 (121.00,204.00) | 164.00 (60.00,219.20) |
| mean (sd)      | 205.20 $\pm$ 196.18    | 185.40 $\pm$ 81.31    |
| maximum        | 1342.00                | 438.00                |

Figure S26: Boxplot for FAL ADM.

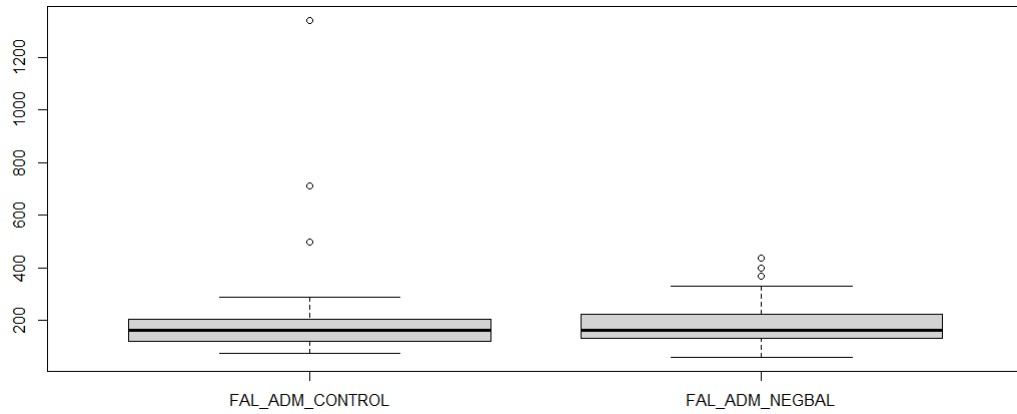

Table S68: Paired differences  $t$ -test between FAL ADM CONTROL and FAL ADM NEGBAL.

| <b>FAL ADM CONTROL v FAL ADM NEGBAL</b> |        |            |                         |                                 |
|-----------------------------------------|--------|------------|-------------------------|---------------------------------|
| $t$                                     | DF     | $p$ -value | 95% confidence interval | sample estimates (respectively) |
| 0.65003                                 | 64.858 | 0.518      | [-41.06498, 80.69320]   | 205.1837 185.3696               |

Table S69: BIT ADM summary.

| <b>BIT ADM</b> |                        |                       |
|----------------|------------------------|-----------------------|
|                | CONTROL GROUP (N = 48) | NEGBAL GROUP (N = 47) |
| minimum        | 41.12                  | 5.00                  |
| median (IQR)   | 6.95 (6.09,7.00)       | 6.70 (5.98,7.00)      |
| mean (sd)      | 6.68 $\pm$ 1.14        | 6.55 $\pm$ 0.74       |
| maximum        | 12.00                  | 8.51                  |

Figure S27: Boxplot for BIT. ADM.

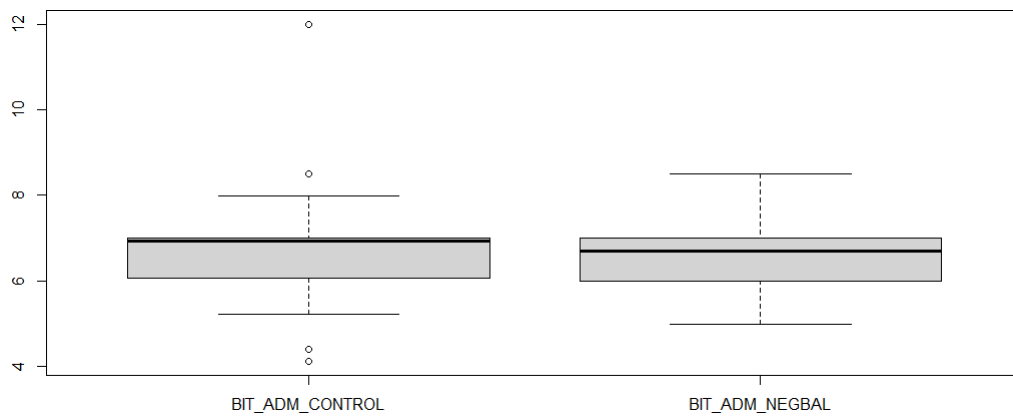



Table S70: Paired differences  $t$ -test between BIT ADM CONTROL and BIT ADM NEGBAL.

| <b>.BIT ADM CONTROL v BIT.ADM NEGBAL</b> |        |            |                         |                                 |          |
|------------------------------------------|--------|------------|-------------------------|---------------------------------|----------|
| $t$                                      | DF     | $p$ -value | 95% confidence interval | sample estimates (respectively) |          |
| 0.65802                                  | 81.149 | 0.5124     | [-0.2624909, 0.5219146] | 6.683542                        | 6.553830 |

Table S71: BID ADM summary.

| <b>BID ADM</b> |                        |                       |
|----------------|------------------------|-----------------------|
|                | CONTROL GROUP (N = 49) | NEGBAL GROUP (N = 45) |
| minimum        | 0.89                   | 0.39                  |
| median (IQR)   | 1.40 (1.23,1.59)       | 1.40 (1.25,2.00)      |
| mean (sd)      | 1.73 $\pm$ 1.11        | 2.44 $\pm$ 4.49       |
| maximum        | 6.00                   | 31.00                 |

Figure S28: Boxplot for BID ADM.

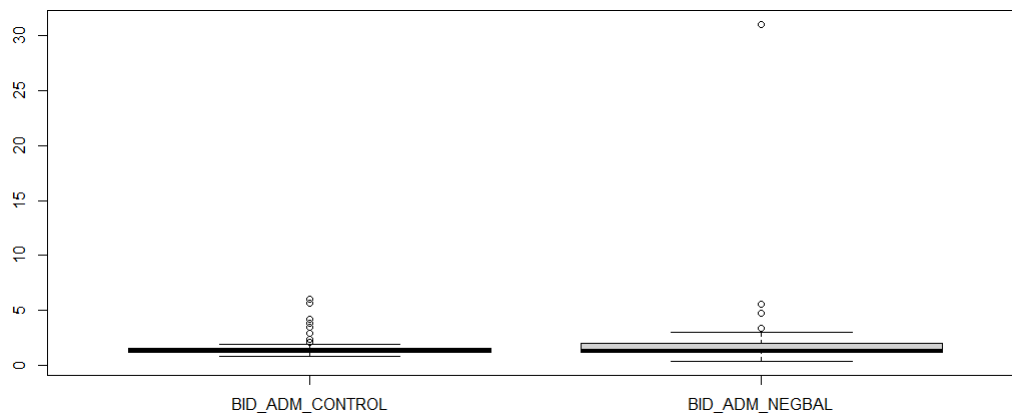

Table S72: Paired differences  $t$ -test between BID ADM CONTROL and BID ADM NEGBAL.

| <b>.BID ADM CONTROL v BID.ADM NEGBAL</b> |        |            |                         |                                 |          |
|------------------------------------------|--------|------------|-------------------------|---------------------------------|----------|
| $t$                                      | DF     | $p$ -value | 95% confidence interval | sample estimates (respectively) |          |
| -1.0341                                  | 48.943 | 0.3062     | [-2.0943874, 0.6712853] | 1.732449                        | 2.444000 |

Table S73: Average value, maximum, minimum and standard deviation of selected characteristics for the whole population.

| Characteristic                       | average | maximum | minimum | standard deviation |
|--------------------------------------|---------|---------|---------|--------------------|
| AGE                                  | 59.66   | 91      | 22      | 13.62              |
| WEIGHT                               | 87.26   | 136     | 50      | 18.6               |
| BMI                                  | 30.09   | 42      | 19      | 5.16               |
| APACHE II                            | 8.01    | 21      | 3       | 3.26               |
| HR                                   | 83.53   | 120     | 53      | 15.01              |
| SBP                                  | 127.8   | 223     | 93      | 19.24              |
| DBP                                  | 77.47   | 115     | 44      | 12.4               |
| TEMP                                 | 36.53   | 39      | 35      | 0.86               |
| RR                                   | 24.91   | 40      | 13      | 4.58               |
| pO <sub>2</sub> admission            | 73.39   | 149.6   | 43      | 18.89              |
| PaFiO <sub>2</sub> admission         | 164.2   | 297.9   | 54      | 70.21              |
| pCO <sub>2</sub> admission           | 33.28   | 50      | 17      | 5.15               |
| HCO <sub>3</sub> admission           | 21.89   | 31      | 12      | 3.06               |
| CREAT admission                      | 9.01    | 15.3    | 5.2     | 2.22               |
| LYMP admission ( <i>n</i> = 115)     | 959.7   | 5773    | 122     | 665.01             |
| TROPO ( <i>n</i> = 87)               | 10.4    | 41      | 0.43    | 8.35               |
| BNP ( <i>n</i> = 76)                 | 224.8   | 873     | 5       | 235.12             |
| TGO ( <i>n</i> = 96)                 | 49.58   | 232     | 12      | 37.72              |
| TGP ( <i>n</i> = 96)                 | 57.25   | 460     | 10      | 68.04              |
| CT score admission ( <i>n</i> = 112) | 15.72   | 25      | 5       | 4.63               |
| DIAM VCS ( <i>n</i> = 111)           | 17.71   | 25.4    | 10.4    | 2.97               |
| HTO                                  | 39.79   | 52      | 25      | 4.91               |

Table S74: Percentages of age ranges for the whole population and for CONTROL and NEGBAL groups and *p*-value of the comparison CONTROL v NEGBAL.

| Age range   | No. (%) whole population | No. (%) CONTROL | No. and % NEGBAL | <i>p</i> -value |
|-------------|--------------------------|-----------------|------------------|-----------------|
| AGE (18-49) | 32 (27.59)               | 15 (25.86)      | 17 (29.31)       | 0.6767          |
| AGE (50-64) | 40 (34.48)               | 22 (37.93)      | 18 (31.03)       | 0.0158          |
| AGE (≥ 65)  | 44 (37.93)               | 21 (36.21)      | 23 (39.66)       | 0.00454         |

Table S75: Proportion of whole population for selected categorical variables.

| Characteristic                 | yes No.(%) | no No.(%)  |
|--------------------------------|------------|------------|
| OBESITY                        | 59 (50.86) | 57 (49.14) |
| HTA                            | 47 (40.52) | 69 (59.48) |
| DBT                            | 30 (25.86) | 86 (74.14) |
| EPOC ( <i>n</i> = 115)         | 20 (17.39) | 95 (82.61) |
| Vaccine (1 <sup>st</sup> dose) | 52 (44.83) | 64 (55.17) |
| Vaccine (2 <sup>nd</sup> dose) | 27 (23.28) | 89 (76.72) |
