# Supplementary material for: Lung Injury in COVID-19 Has Pulmonary Edema as an Important Component and Treatment with Furosemide and Negative Fluid Balance (NEGBAL) Decreases Mortality
Source: MDPI journal article supplement (doi:10.3390/jcm12041542), 2023-02-15
Supplement: s1 [file s1]

## Appendix: Supplemental Statistics N°2

This appendix has been provided by the authors to give readers additional information about their work.

Supplement to: Jose L. Francisco Santos, MD; Patricio Zanardi, MD; Veronica Alo, MD; Vanina Dos Santos, MD; Leonardo Bovone, MD; Marcelo Rodriguez, MD; Federico Magdaleno, MD; Virginia De Langhe, MD; Andrea Villoldo, MD; Romina Martinez Souvielle, MD; Julieta Alconcher, MD; Diego Quiros, MD; Claudio Milicchio, MD and Eduardo Garcia Saiz, MD. **Lung Injury in COVID-19 has Pulmonary Edema as an important component and treatment with Furosemide and Negative Fluid Balance (NEGBAL) decreases mortality.**

### Statistical Report COVID-19 treatment with NEGBAL protocol

Dr. Hernán A. Vivas

Centro Marplatense de Investigaciones Matemáticas (UNMDP - CIC)

#### Contents

#### 1. Data source and description

#### 2. Statistical model

#### 3. Results

##### 3.1 Intrinsic evolution

Figure S1: Boxplot for PAFI ADM, PAFI D4, PAFI D8 and PAFI DIS for the CONTROL group.

Table S1: Evolution of PAFI CONTROL group

Table S2: Evolution of PAFI NEGBAL group

Table S3: Results for the paired differences between PAFI ADM and PAFI D04, PAFI ADM and PAFI D08 and PAFI ADM and PAFI DIS for the CONTROL group

Table S4: Results for the paired differences between PAFI ADM and PAFI D4, PAFI ADM and PAFI D8 and PAFI ADM and PAFI DIS for the NEGBAL group.

Figure S2: Boxplot for PAFI ADM, PAFI D4, PAFI D8 and PAFI DIS for the NEGBAL group.

Table S5: Evolution of HEMATOCRIT CONTROL group

Table S6: Evolution of HEMATOCRIT NEGBAL group

Table S7: Results for the paired differences between HCT ADM and HCT D4, HCT ADM and HCT D8 and HCT ADM and HCT DIS for the CONTROL group.

- Table S8: Results for the paired differences between HCT ADM and HCT D4, HCT ADM and HCT D8 and HCT ADM and HCT DIS for the NEGBAL group.

- Figure S3: Boxplot for HCT ADM, HCT D4, HCT D8 and HCT DIS for the CONTROL group.

Figure S4: Boxplot for HCT ADM, HCT D4, HCT D8 and HCT DIS for the NEGBAL group.

Figure S5: Boxplot for CREAT ADM, CREAT D4, CREAT D8 and CREAT DIS for the CONTROL group.

Table S9: Evolution of CREATININE CONTROL group

Table S10: Evolution of CREATININE NEGBAL group

Table S11: Results for the paired differences between CREAT ADM and CREAT D4, CREAT ADM and CREAT D8 and CREAT ADM and CREAT DIS for the CONTROL group.

- Table S12: Results for the paired differences between CREAT ADM and CREAT D4, CREAT ADM and CREAT D8 and CREAT ADM and CREAT DIS for the NEGBAL group.

Figure S6: Boxplot for CREAT ADM, CREAT D4, CREAT D8 and CREAT DIS for the NEGBAL group.

Table S13: CTSCORE previous to the treatment and on the day of admission, the fourth, the eight and the twelfth days for the CONTROL group.

Table S14: CTSCORE previous to the treatment and on the day of admission, the fourth, the eight and the twelfth days for the NEGBAL group.

Table S15: Results for the paired differences between CTSCORE PRE and CTSCORE ADM, CTSCORE ADM and CTSCORE D4, CTSCORE ADM and CTSCORE D8 and CTSCORE ADM and CTSCORE D12 for the CONTROL group.

Table S16: Results for the paired differences between CTSCORE PRE and CTSCORE ADM, CTSCORE ADM and CTSCORE D4, CTSCORE ADM and CTSCORE D8 and CTSCORE ADM and CTSCORE D12 for the NEGBAL group.

Figure S7: Boxplot for CTSCORE PRE, CTSCORE ADM, CTSCORE D4, CTSCORE D8 and

CTSCORE D12 for the CONTROL group.

Figure S8: Boxplot for CTSCORE PRE, CTSCORE ADM, CTSCORE D4, CTSCORE D8 and CTSCORE D12 for the NEGBAL group.

Figure S9: Boxplot for SVC PRE, SVC ADM, SVC D4, SVC D8 and SVC D12 for the CONTROL group.

Table S17: SVC previous to the treatment and on the day of admission, the fourth, the eight and the twelfth days for the CONTROL group

Table S18: SVC previous to the treatment and on the day of admission, the fourth, the eight and the twelfth days for the NEGBAL group.

Table S19: Results for the paired differences between SVC PRE and SVC ADM, SVC ADM and SVC D4, SVC ADM and SVC D8 and SVC ADM SVC D12 for the CONTROL group.

- Table S20: Results for the paired differences between SVC PRE and SVC ADM, SVC ADM and SVC D4, SVC ADM and SVC D8 and SVC ADM SVC D12 for the NEGBAL group.

- Figure S10: Boxplot for SVC PRE, SVC ADM, SVC D4, SVC D8 and SVC D12 for the NEGBAL group.

Table S21: Results for the paired differences of PAFI D4, PAFI D8 and PAFI DIS between groups.

Figure S11: Boxplot for PAFI D4 CONTROL and PAFI D4 NEGBAL.

### 3.2 Day by day comparison

Table S22: Results for the paired differences of HCT D4, HCT D8 and HCT DIS between groups.

Figure S12: Boxplot for PAFI D8 CONTROL and PAFI D8 NEGBAL.

Figure S13: Boxplot for PAFI DIS CONTROL and PAFI DIS NEGBAL.

Table S23: Results for the paired differences of CREAT D4, CREAT D8 and CREAT DIS between groups.

Figure S14: Boxplot for HCT D4 CONTROL and HCT D4 NEGBAL.

Figure S15: Boxplot for HCT D8 CONTROL and HCT D8 NEGBAL.

Figure S16: Boxplot for HCT DIS CONTROL and HCT DIS NEGBAL.

Figure S17: Boxplot for CREAT D4 CONTROL and CREAT D4 NEGBAL.

Figure S18: Boxplot for CREAT D8 CONTROL and CREAT D8 NEGBAL.

Figure S19: Boxplot for CREAT DIS CONTROL and CREAT DIS NEGBAL.

Table S24: Results LEUC ADM CONTROL and LEUC ADM NEGBAL.

Table S25: Results for the paired differences between LEUC ADM CONTROL and LEUC ADM NEGBAL.

Figure S20: Boxplot for LEUC ADM CONTROL and LEUC ADM NEGBAL.

Table S26: Results for the paired differences of CTSCORE ADM, CTSCORE D4, CTSCORE D8 and CTSCORE D12 between groups.

Table S27: Results for the paired differences of SVC ADM, SVC D4, SVC D8 and SVC D12 between groups.

Figure S21: Boxplot for CTSCORE ADM CONTROL and CTSCORE ADM NEGBAL.

Figure S22: Boxplot for CTSCORE D4 CONTROL and CTSCORE D4 NEGBAL.

Figure S23: Boxplot for CTSCORE D8 CONTROL and CTSCORE D8 NEGBAL.

Figure S24: Boxplot for CTSCORE D12 CONTROL and CTSCORE D12 NEGBAL.

Figure S25: Boxplot for SVC ADM CONTROL and SVC ADM NEGBAL.

Figure S26: Boxplot for SVC D4 CONTROL and SVC D4 NEGBAL.

Figure S27: Boxplot for SVC D8 CONTROL and SVC D8 NEGBAL.

Figure S28: Boxplot for SVC D12 CONTROL and SVC D12 NEGBAL.

Figure S29: Boxplot for ACC HYD BAL CONTROL and ACC HYD BAL NEGBAL.

Table S28: Results of Accumulated Hydric Balance of CONTROL group.

Table S29: ACC HYD BAL for survivors of the CONTROL group.

Table S30: ACC HYD BAL for nonsurvivors of the CONTROL group.

Figure S30: Boxplot for HOSP DAYS-CONTROL and HOSP DAYS NEGBAL.

Table S31: Results of Accumulated Hydric Balance of NEGBAL group.

Table S32: Results for the paired differences of ACC HYD BAL between groups.

Figure S31: Boxplot for ICU DAYS CONTROL and ICU DAYS NEGBAL.

Figure S32: Boxplot for IMV DAYS CONTROL and IMV DAYS NEGBAL.

Table S33: Results of HOSP DAYS, ICU DAYS and IMV DAYS in CONTROL group.

Table S34: Results of HOSP DAYS, ICU DAYS and IMV DAYS in NEGBAL group.

Table S35: Results for the paired differences of HOSP DAYS, ICU DAYS and IMV DAYS between groups.

Table S36: Result frequencies

Table S37: Pearson's  $\chi^2$  test (Yates' continuity correction)

Figure S33: Mosaic plot for the result of the treatment.

Table S38: Results for the paired differences of ACC HYD BAL between survivors and nonsurvivors within groups and in the whole population.

### 3.3 Regression

Figure S34: Scatter plot and regression line for ACC HYD BAL CONTROL and PAFI DIS CONTROL,  $p = 0.007238$ .

Figure S35: Scatter plot and regression line for ACC HYD BAL NEGBAL and PAFI DIS NEGBAL,  $p =$

0.0429.

Figure S36: Stripchart for PAFI v VAC.

### 3.4 Accumulated hydric balance comparison

Figure S37: Boxplot for ACC HYD BAL CONTROL SUR and ACC HYD BAL CONTROL NONSUR.

Figure S38: Boxplot for ACC HYD BAL NEGBAL SUR and ACC HYD BAL NEGBAL NONSUR.

Figure S39: Boxplot for ACC HYD BAL SUR and ACC HYD BAL NONSUR.

### 3.5 Attached Dossier

Table S39: Result IMV use

Figure S40: Boxplot for ICU from SSD CONTROL and ICU from SSD NEGBAL

## 1 Data source and description

We analyzed data from 116 patients treated for COVID-19 disease. A first group of 58 patients was treated with the standard treatment (CONTROL group) and a second group was treated following the NEGBAL protocol (NEGBAL group). At this stage, we compared data from both populations as to inquire whether there was any statistically significant difference between the evolution of those patients treated with NEGBAL protocol and those treated with the standard treatment.

The data consisted of: PaFiO<sub>2</sub>, creatinine (CREAT) and hematocrit (HCT) measurements for at the moment of admission, at days 4 and 8 and at discharge<sup>1</sup>; leukocytes (LEUC) at the moment of admission; accumulated hydric balance after the 8 days (ACC HYD BAL); hospitalization days (DAYS INT), ICU days (ICU DAYS) and days under MV (DAYS MiV); and result of the treatment (RES, alive or dead); CT score and superior vena cava diameter (CTSCORE and SVC respectively) measurements previous to the treatment, at the moment of admission, at days 4, 8 and 12.

On some variables there were missing values, namely: - PAFI D4 CONTROL (2), - PAFI D8 CONTROL (13), PAFI D4 NEGBAL (3), PAFI D8 NEGBAL (14), PAFI DIS NEGBAL (4), HCT D4 CONTROL (2), HCT D8 CONTROL (14), HCT D4 CONTROL (3), HCT D8 CONTROL (17), CREAT D4 CONTROL (2), CREAT D8 CONTROL (12), CREAT D4 NEGBAL (3), CREAT D8 NEGBAL (16), CT SCORE PRE CONTROL (34), CT SCORE ADM CONTROL (4), CT SCORE D4 CONTROL (37), CT SCORE D8 CONTROL (41), CT SCORE D12 CONTROL (38), CT SCORE PRE NEGBAL (39), CT SCORE D4 NEGBAL (3), CT SCORE D8 NEGBAL (18), CT SCORE D12 NEGBAL (50), SVC PRE CONTROL (34), SVC ADM CONTROL (4), SVC D4 CONTROL (37), SVC D8 CONTROL (41), SVC D12 CONTROL (38), SVC PRE NEGBAL (39), SVC ADM NEGBAL (1), SVC D4 NEGBAL (3), SVC SCORE D8 NEGBAL (19), SVC SCORE D12 NEGBAL (50), ACC HYD BAL CONTROL (9).

## 2 Statistical model

Five types of analyses were performed:

1. an intrinsic analysis via paired differences  $t$  tests regarding the evolution of the variables PaFiO<sub>2</sub>, CREAT (creatinine) and HCT (hematocrit) at the moment of admission, days 4 and 8 and discharge and CTSCORE and SVC previous to the treatment, at the moment of admission, and at days 4, 8 and 12 *for the same group* ;
2. a *comparative* analysis via unpaired differences  $t$  tests regarding of the same variables as above (as well as the variable LEUC at the moment of admission) but comparing for each day the values of both groups, together with a comparison (again using unpaired difference  $t$  tests) of the variables ACC HYD BAL and hospitalization days between groups and a Pearson's  $\chi^2$  test for result;
3. a simple regression model to assess the correlation between PaFiO<sub>2</sub> and ACC HYD BAL in both groups:

$$\text{PaFiO}_2 \sim \beta_0 + \beta_1 \text{ACC HYD BAL}; \quad (1)$$

4. a multivariate regression model to assess the correlation between PaFiO<sub>2</sub> and ACC HYD BAL and vaccination (VAC) for the whole population:

$$\text{PaFiO}_2 \sim \beta_0 + \beta_1 \text{ACC HYD BAL} + \beta_2 \text{VAC}; \quad (2)$$

5. a paired differences  $t$  tests comparing the values of the variable ACC HYD BAL for survivors and non survivors within each group and for the whole population.

## 3 Results

We divide the results in subsections according to the analyses detailed in the previous paragraph: intrinsic evolution, day by day comparison and regression.

---

<sup>1</sup>All the data supplied consisted on the same measurements for both groups, except for the missing values.

Figure S1: Boxplot for PAFI ADM, PAFI D4, PAFI D8 and PAFI DIS for the CONTROL group.

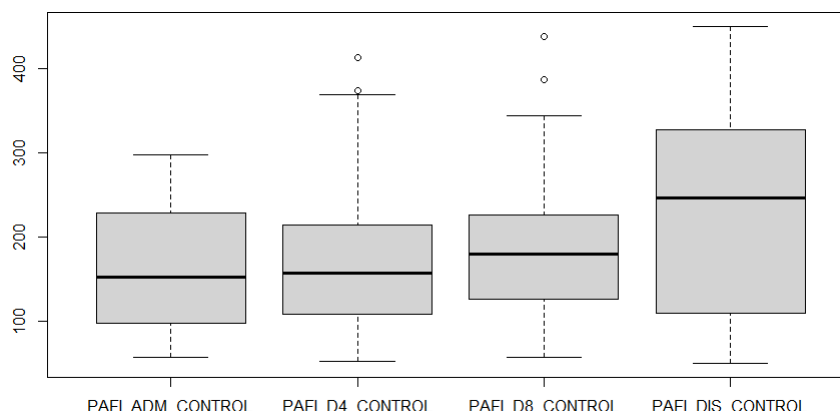

### 3.1 Intrinsic evolution

Tables 1 and 2 contain, respectively, the data of  $\text{PaFiO}_2$  for the CONTROL and NEGBAL groups at the moment of admission, days 4 and 8 and discharge; the results for the paired differences between PAFI ADM and PAFI D4, PAFI ADM and PAFI D8 and PAFI ADM and PAFI DIS can be found respectively in Tables 3 and 4 while the corresponding boxplots are in Figures 1 and 2. We point out the presence of outliers: PAFI D4 CONTROL (2), PAFI D8 CONTROL (2), PAFI DIS NEGBAL (6).

Tables 5 and 6 contain, respectively, the data of HCT for the CONTROL and NEGBAL groups at the moment of admission, days 4 and 8 and discharge; the results for the paired differences between HCT ADM and HCT D4, HCT ADM and HCT D8 and HCT ADM and HCT DIS can be found respectively in Tables 7 and 8 while the corresponding boxplots are in Figures 3 and 4. We point out the presence of outliers: HCT ADM CONTROL (3), HCT D4 CONTROL (2), HCT D8 CONTROL (1), HCT DIS CONTROL (1), HCT ADM NEGBAL (1), HCT D4 NEGBAL (2), HCT D8 NEGBAL (1), HCT DIS NEGBAL (1).

Tables 9 and 10 contain, respectively, the data of CREAT for the CONTROL and NEGBAL groups at the moment of admission, days 4 and 8 and discharge; the results for the paired differences between CREAT ADM and CREAT D4, CREAT ADM and CREAT D8 and CREAT ADM and CREAT DIS can be found respectively in Tables 11 and 12 while the corresponding boxplots are in Figures 5 and 6. We point out the presence of outliers: CREAT ADM CONTROL (6), CREAT D4 CONTROL (3), CREAT D8 CONTROL (3), CREAT DIS CONTROL (9), CREAT D4 NEGBAL (2), CREAT D8 NEGBAL (1), CREAT DIS NEGBAL (7).

The data of CTSCORE for the CONTROL and NEGBAL groups can be found, respectively, in Tables 13 and 14 and Figures 7 and 8 display the boxplots of this data for each group separately. Tables 15 and 16 display the result of the  $t$  test comparison for CTSCORE previous to the treatment and on the admission day and the admission day compared to days 4, 8 and 12 for each group (CONTROL and NEGBAL respectively).

The data of SVC for the CONTROL and NEGBAL groups can be found, respectively, in Tables 17 and 18 and Figures 9 and 10 display the boxplots of this data for each group separately. Tables 19 and 20 display the result of the  $t$  test comparison for SVC previous to the treatment and on the admission day and the admission day compared to days 4, 8 and 12 for each group (CONTROL and NEGBAL respectively).

Table S1: Evolution of PAFI CONTROL group

|                    | PAFLADM CONTROL | PAFLD04 CONTROL | PAFLD08 CONTROL | PAFLDIS CONTROL |
|--------------------|-----------------|-----------------|-----------------|-----------------|
| 1                  | 131.67          | 122.00          | 158.00          | 87.00           |
| 2                  | 100.00          | 106.25          | 318.93          | 357.00          |
| 3                  | 198.33          | 212.50          | 84.44           | 108.00          |
| 4                  | 277.78          |                 | -               | 211.00          |
| 5                  | 75.00           | 115.00          | 249.60          | 404.00          |
| 6                  | 277.14          | 317.14          | -               | 422.00          |
| 7                  | 172.50          | 157.50          | -               | 314.00          |
| 8                  | 100.00          | 253.12          | 300.00          | 328.00          |
| 9                  | 113.75          | 215.62          | 271.43          | 304.00          |
| 10                 | 228.57          | 187.50          | -               | 371.00          |
| 11                 | 277.78          | 314.29          | -               | 314.00          |
| 12                 | 185.00          | 192.50          | 140.00          | 188.00          |
| 13                 | 152.50          | 92.57           | 181.00          | 250.00          |
| 14                 | 82.50           | 76.67           | 146.67          | 56.00           |
| 15                 | 106.00          | 280.00          | 234.00          | 97.00           |
| 16                 | 149.75          | 81.11           | 237.50          | 243.00          |
| 17                 | 201.67          | 111.25          | 98.57           | 148.00          |
| 18                 | 108.67          | 52.00           | 83.00           | 142.00          |
| 19                 | 172.50          | 148.80          | 126.15          | 320.00          |
| 20                 | 166.00          | 156.80          | 122.75          | 331.25          |
| 21                 | 268.61          | 172.50          | 305.71          | 451.00          |
| 22                 | 235.62          | 92.86           | 116.00          | 70.00           |
| 23                 | 160.00          | 75.00           | 70.00           | 218.00          |
| 24                 | 140.00          | 370.00          | 210.00          | 162.00          |
| 25                 | 227.78          | 160.00          | 180.00          | 282.00          |
| 26                 | 71.11           | 134.55          | 133.33          | 50.00           |
| 27                 | 221.88          | 116.67          | 211.11          | 312.00          |
| 28                 | 80.00           | 71.56           | 63.50           | 200.00          |
| 29                 | 245.36          | 413.21          | 226.67          | 256.66          |
| 30                 | 80.29           | 164.00          | 188.40          | 73.10           |
| 31                 | 271.43          | 151.67          | 188.00          | 58.00           |
| 32                 | 68.89           | 297.78          | 202.50          | 357.00          |
| 33                 | 70.00           | 210.00          | 154.00          | 161.00          |
| 34                 | 82.86           | 208.33          | -               | 175.00          |
| 35                 | 279.17          | 143.33          | 156.00          | 100.00          |
| 36                 | 270.83          | 147.22          | -               | 205.00          |
| 37                 | 86.67           | 74.00           | 72.86           | 329.00          |
| 38                 | 143.33          | 293.33          | -               | 290.00          |
| 39                 | 57.00           | 62.00           | 57.00           | 67.00           |
| 40                 | 278.57          | 212.50          | -               | 342.00          |
| 41                 | 69.00           | 121.67          | -               | 117.00          |
| 42                 | 78.57           | 77.12           | 205.00          | 237.50          |
| 43                 | 89.33           | 92.20           | 128.00          | 91.43           |
| 44                 | 181.00          | 309.17          | 387.14          | 387.00          |
| 45                 | 214.29          | 374.76          | 439.05          | 364.29          |
| 46                 | 150.25          | 171.14          | 163.89          | 235.70          |
| 47                 | 147.14          | 328.57          | -               | 333.00          |
| 48                 | 97.43           | 246.67          | 130.00          | 323.30          |
| 49                 | 240.00          | 309.52          | -               | 314.00          |
| 50                 | 99.12           | 110.43          | 212.50          | 417.00          |
| 51                 | 147.14          | 122.83          | 344.64          | 317.92          |
| 52                 | 297.92          | 89.29           | 94.60           | 317.00          |
| 53                 | 79.57           | 111.00          | 78.00           | 110.00          |
| 54                 | 190.94          | 161.17          | 183.25          | 379.00          |
| 55                 | 260.71          | 158.17          | 189.60          | 102.00          |
| 56                 | 152.50          | 192.50          | 240.00          | 271.00          |
| 57                 | 260.36          | 102.00          | 168.00          | 60.00           |
| 58                 | 187.00          | -               | -               | 96.40           |
| Mean               | 164.81          | 175.7           | 183.4           | 235.0           |
| Median             | 152.50          | 157.2           | 180.0           | 246.5           |
| Standard deviation | 73.64           | 90.59           | 87.03           | 116.48          |

Table S2: Evolution of PAFI NEGBAL group

|                    | PAFLADM NEGBAL | PAFLD04 NEGBAL | PAFLD08 NEGBAL | PAFLDIS NEGBAL |
|--------------------|----------------|----------------|----------------|----------------|
| 1                  | 60.00          | 224.00         | 195            | 78             |
| 2                  | 61.60          | 247.50         | 366            | 463            |
| 3                  | 65.00          | 142.50         | 340            | 309            |
| 4                  | 188.00         | 460.71         | -              | 347            |
| 5                  | 96.25          | 81.25          | 218            | 323            |
| 6                  | 110.00         | 328.12         | -              | 371.43         |
| 7                  | 61.25          | 125.00         | 255            | 342            |
| 8                  | 100.00         | 130.00         | 367            | 300            |
| 9                  | 177.78         | 400.00         | -              | 400            |
| 10                 | 86.00          | 111.11         | 117            | 251.7          |
| 11                 | 120.00         | 205.00         | 407            | 404            |
| 12                 | 121.67         | 233.33         | 323            | 352            |
| 13                 | 101.25         | 253.57         | 384            | 380            |
| 14                 | 185.00         | 314.29         | -              | 314            |
| 15                 | 145.00         | 268.75         | 341            | 302.3          |
| 16                 | 197.50         | 341.67         | -              | 366            |
| 17                 | 102.00         | 105.00         | 225            | 103.1          |
| 18                 | 160.00         | 190.00         | 189            | 257.8          |
| 19                 | 104.29         | 376.19         | 499            | 495            |
| 20                 | 162.50         | 375.00         | 314            | 361            |
| 21                 | 184.38         | 287.50         | -              | 342            |
| 22                 | 172.22         | 352.38         | 395.7          | 395.7          |
| 23                 | 225.00         | 304.76         | 297            | 376.6          |
| 24                 | 258.33         | 401.90         | -              | 417.6          |
| 25                 | 146.00         | 94.00          | 90             | 77             |
| 26                 | 231.25         | 322.92         | 318            | 300            |
| 27                 | 126.25         | 240.00         | 355            | 318            |
| 28                 | 203.12         | 253.93         | 250            | 309            |
| 29                 | 140.00         | -              | 349            | 347            |
| 30                 | 90.00          | 137.14         | 307            | 338            |
| 31                 | 178.12         | 251.07         | 322            | 375            |
| 32                 | 250.00         | 333.33         | 376            | 380            |
| 33                 | 259.38         | -              | -              | 353            |
| 34                 | 246.43         | 262.14         | -              | 456            |
| 35                 | 191.67         | 258.33         | 367            | 309            |
| 36                 | 58.00          | 61.25          | 82             | 100            |
| 37                 | 177.50         | 132.86         | 50             | 118            |
| 38                 | 256.25         | 309.52         | 333            | 432            |
| 39                 | 272.22         | 438.10         | 364            | 361            |
| 40                 | 281.56         | 189.67         | 278            | 312.6          |
| 41                 | 197.25         | 202.22         | 215            | 215            |
| 42                 | 209.69         | 388.57         | -              | 411            |
| 43                 | 207.14         | -              | -              | 321            |
| 44                 | 171.88         | 208.33         | 289            | 361            |
| 45                 | 264.29         | 433.33         | -              | 376            |
| 46                 | 85.71          | 254.44         | 367            | 495            |
| 47                 | 128.00         | 193.80         | 268            | 378            |
| 48                 | 89.33          | 164.36         | -              | 127.5          |
| 49                 | 154.50         | 235.00         | 319            | 346            |
| 50                 | 103.33         | 133.00         | 366            | 342            |
| 51                 | 270.00         | 361.90         | -              | 411            |
| 52                 | 54.00          | 81.25          | 108            | 408.7          |
| 53                 | 84.20          | 217.40         | 353            | 471.9          |
| 54                 | 231.11         | 237.19         | 190            | 338            |
| 55                 | 228.21         | 335.36         | 487            | 487            |
| 56                 | 256.88         | 263.93         | 257            | 293            |
| 57                 | 162.50         | 230.00         | 253            | 290.4          |
| 58                 | 235.71         | 241.79         | 233            | 480            |
| Mean               | 163.6          | 249.56         | 290.4          | 344.0          |
| Median             | 167.2          | 247.50         | 316.0          | 352.5          |
| Standard deviation | 67.25          | 100.5          | 101.04         | 97.63          |

Table S3: Results for the paired differences between PAFI ADM and PAFI D04, PAFI ADM and PAFI D08 and PAFI ADMand PAFI DIS for the CONTROL group

|                                         | <i>t</i> | DF | <i>p</i> -value | 95 % confidence interval |
|-----------------------------------------|----------|----|-----------------|--------------------------|
| PAFI ADM CONTROL and PAFI D4 CONTROL    | -0.97452 | 55 | 0.3341          | [ -40.78967, 14.09866]   |
| PAFI ADM CONTROL and PAFI D8 CONTROL    | -1.9113  | 44 | 0.06249         | [61.383470, 1.626253]    |
| PAFI ADM CONTROL and PAFI FINAL CONTROL | -4.1863  | 57 | 9.928e-05       | [-103.70732, -36.59521]  |

Table S4: Results for the paired differences between PAFI ADM and PAFI D4, PAFI ADM and PAFI D8 and PAFI ADMand PAFI DIS for the NEGBAL group.

|                                     | <i>t</i> | DF | <i>p</i> -value | 95 % confidence interval |
|-------------------------------------|----------|----|-----------------|--------------------------|
| PAFI-ADM NEGBAL and PAFI D4 NEGBAL  | -8.2238  | 54 | 4.302e-11       | [-109.58259, -66.62487]  |
| PAFI-ADM NEGBAL and PAFI D8 NEGBAL  | -8.1042  | 43 | 3.376e-10       | [-174.2546, -104.8107]   |
| PAFI-ADM NEGBAL and PAFI DIS NEGBAL | -12.12   | 53 | < 2.2e-16       | [-206.8090, -148.0772]   |

Figure S2: Boxplot for PAFI ADM, PAFI D4, PAFI D8 and PAFI DIS for the NEGBAL group.

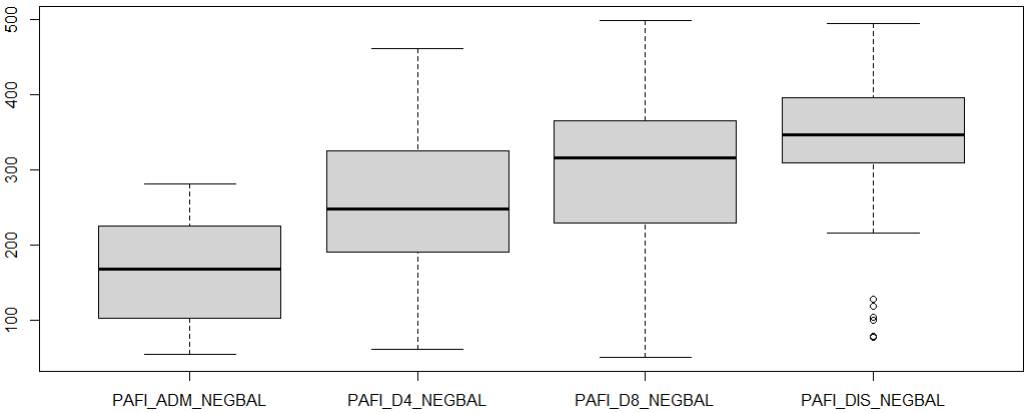



Table S5: Evolution of HEMATOCRIT CONTROL group

|                    | HCT-ADM CONTROL | HCT-D4 CONTROL | HCT-D8 CONTROL | HCT-DIS CONTROL |
|--------------------|-----------------|----------------|----------------|-----------------|
| 1                  | 37.00           | 37.00          | 36.20          | 39.30           |
| 2                  | 42.00           | 38.00          | 40.30          | 36.20           |
| 3                  | 39.00           | 34.60          | 34.20          | 26.60           |
| 4                  | 37.10           | -              | -              | 44.7            |
| 5                  | 44.00           | 45.00          | 40.30          | 43.90           |
| 6                  | 47.50           | 44.90          | -              | 44.9            |
| 7                  | 26.00           | 29.00          | -              | 26.7            |
| 8                  | 32.00           | 34.00          | 32.80          | 32.80           |
| 9                  | 46.00           | 42.00          | -              | 43.70           |
| 10                 | 40.00           | 38.00          | -              | 38.20           |
| 11                 | 40.70           | 39.00          | -              | 39.30           |
| 12                 | 28.00           | 28.00          | 28.6           | 28.7            |
| 13                 | 34.30           | 32.60          | 35.5           | 23.9            |
| 14                 | 45.00           | 42.00          | 36.1           | 33.70           |
| 15                 | 45.00           | 40.00          | 37.80          | 26.2            |
| 16                 | 38.30           | 39.00          | 39.6           | 40.4            |
| 17                 | 35.70           | 36.00          | 36.30          | 21.7            |
| 18                 | 41.00           | 39.00          | 39.20          | 40.9            |
| 19                 | 38.80           | 32.20          | 31.5           | 41.6            |
| 20                 | 45.00           | 44.60          | 41.2           | 39.6            |
| 21                 | 41.00           | 41.00          | 42.1           | 41.1            |
| 22                 | 43.00           | 43.00          | 41.8           | 38.4            |
| 23                 | 44.00           | 40.00          | 40.9           | 37.4            |
| 24                 | 40.90           | 41.00          | 32.9           | 36.6            |
| 25                 | 36.00           | 36.00          | 33.70          | 34.70           |
| 26                 | 52.00           | 41.00          | 44.6           | 32.80           |
| 27                 | 38.00           | 37.00          | 38.20          | 39.4            |
| 28                 | 44.70           | 39.60          | 40.80          | 40.5            |
| 29                 | 40.10           | 42.20          | 44.2           | 40.6            |
| 30                 | 39.20           | 35.30          | 36.6           | 23.3            |
| 31                 | 46.00           | 43.00          | 36.1           | 30.1            |
| 32                 | 34.00           | 31.00          | 32.20          | 26.1            |
| 33                 | 41.00           | 44.00          | 34.80          | 19.90           |
| 34                 | 42.00           | 46.00          | -              | 47.4            |
| 35                 | 47.00           | 40.00          | 38.80          | 39.70           |
| 36                 | 40.00           | 37.00          | -              | 36.20           |
| 37                 | 41.00           | 42.00          | 45.3           | 39.1            |
| 38                 | 43.00           | 42.00          | -              | 42.3            |
| 39                 | 47.00           | 46.00          | 46.6           | 36.5            |
| 40                 | 36.00           | 42.00          | -              | 36.9            |
| 41                 | 52.00           | 53.00          | -              | 45.7            |
| 42                 | 43.60           | 41.40          | 43.9           | 44              |
| 43                 | 39.10           | 42.60          | 38.70          | 38.70           |
| 44                 | 36.10           | 45.40          |                | 48.1            |
| 45                 | 38.00           | 39.80          | 31.9           | 30.2            |
| 46                 | 38.90           | 40.80          | 40.4           | 36.9            |
| 47                 | 33.00           | 30.00          | -              | 32.80           |
| 48                 | 38.30           | 35.50          | 37.10          | 30.80           |
| 49                 | 41.70           | 40.40          | 42.40          | 42.40           |
| 50                 | 45.30           | 36.10          | 41.20          | 41.90           |
| 51                 | 41.60           | 41.20          | 41.50          | 40.90           |
| 52                 | 46.50           | 48.80          | 46.20          | 42.50           |
| 53                 | 38.10           | 31.20          | 33.40          | 35.80           |
| 54                 | 42.50           | 40.40          | 45.40          | 43.20           |
| 55                 | 39.00           | 26.40          | 24.80          | 24.30           |
| 56                 | 40.00           | 35.00          | 36.90          | 38.10           |
| 57                 | 42.60           | 40.30          | 41.30          | 29.90           |
| 58                 | 27.40           | -              | -              | 25.40           |
| Mean               | 40.38           | 39.15          | 38.5           | 38.2            |
| Median             | 40.80           | 40.00          | 38.8           | 36.4            |
| Standard deviation | 5.22            | 5.21           | 4.67           | 6.99            |

Table S5: Evolution of HEMATOCRIT NEGBAL group

|                    | HCT-ADM NEGBAL | HCT-D4 NEGBAL | HCT-D8 NEGBAL | HCT-DIS NEGBAL |
|--------------------|----------------|---------------|---------------|----------------|
| 1                  | 44.00          | 42.00         | 47.6          | 43.50          |
| 2                  | 25.00          | 30.00         | 28.8          | 31.00          |
| 3                  | 37.00          | 44.00         | 43.7          | 38.90          |
| 4                  | 29.30          | 40.00         | -             | 43.10          |
| 5                  | 42.70          | 45.00         | 43.9          | 42.40          |
| 6                  | 43.00          | 43.00         | -             | 43.00          |
| 7                  | 35.00          | 34.00         | 39.30         | 34.40          |
| 8                  | 41.00          | 44.00         | 42.7          | 41.20          |
| 9                  | 38.00          | 40.00         | -             | 40.60          |
| 10                 | 37.40          | 37.00         | 40.8          | 37.30          |
| 11                 | 38.00          | 41.00         | 40.70         | 40.70          |
| 12                 | 35.00          | 38.00         | 37.80         | 36.60          |
| 13                 | 45.00          | 45.00         | 43.70         | 43.70          |
| 14                 | 39.00          | 43.00         | -             | 40.40          |
| 15                 | 35.70          | 38.00         | 35.6          | 37.70          |
| 16                 | 41.00          | 53.00         | -             | 45.60          |
| 17                 | 38.30          | 46.00         | 39.6          | 43.50          |
| 18                 | 34.90          | 40.00         | 37.9          | 34.20          |
| 19                 | 31.30          | 32.00         | 30.3          | 30.50          |
| 20                 | 40.00          | 42.00         | 44.4          | 44.40          |
| 21                 | 34.00          | 43.00         | -             | 44.30          |
| 22                 | 45.00          | 45.00         | -             | 47.70          |
| 23                 | 29.30          | 42.00         | -             | 31.50          |
| 24                 | 35.60          | 46.00         | -             | 35.10          |
| 25                 | 44.90          | 49.90         | 52.7          | 51.20          |
| 26                 | 42.00          | 47.80         | 46.6          | 43.20          |
| 27                 | 37.00          | 42.50         | 40.1          | 40.30          |
| 28                 | 36.60          | 37.90         | 41.3          | 41.00          |
| 29                 | 38.60          | 50.10         | 49.3          | 49.30          |
| 30                 | 35.70          | 38.00         | 37.1          | 36.40          |
| 31                 | 38.00          | 43.50         | 42.1          | 34.20          |
| 32                 | 41.40          | 41.00         | 46.7          | 48.90          |
| 33                 | 37.20          | -             | -             | 38.10          |
| 34                 | 45.00          | 45.40         | -             | 47.50          |
| 35                 | 43.00          | 46.00         | 50.2          | 45.70          |
| 36                 | 44.00          | 45.00         | 49.2          | 54.30          |
| 37                 | 32.00          | 34.00         | 42.2          | 41.10          |
| 38                 | 42.00          | 41.00         | 45.6          | 43.20          |
| 39                 | 42.00          | 44.00         | 40.4          | 40.00          |
| 40                 | 40.30          | 41.90         | 45.6          | 41.00          |
| 41                 | 45.00          | 44.80         | -             | 44.40          |
| 42                 | 44.80          | 49.40         | -             | 50.30          |
| 43                 | 42.00          | -             | -             | 44.20          |
| 44                 | 44.60          | 50.00         | 47.6          | 44.90          |
| 45                 | 40.00          | 49.00         |               | 47.00          |
| 46                 | 38.00          | 36.30         | 37.30         | 36.60          |
| 47                 | 43.60          | 50.30         | 54            | 32.40          |
| 48                 | 41.80          | 42.90         |               | 50.80          |
| 49                 | 39.20          | 48.60         | 41.9          | 36.60          |
| 50                 | 41.00          | 50.00         | 47.5          | 42.70          |
| 51                 | 45.00          | 43.00         | -             | 43.10          |
| 52                 | 42.00          | 44.00         | 42            | 24.90          |
| 53                 | 42.40          | 53.30         | 42.9          | 42.50          |
| 54                 | 38.20          | -             | 39.1          | 39.60          |
| 55                 | 31.80          | 32.70         | 39.9          | 33.40          |
| 56                 | 41.30          | 45.30         | 42            | 33.90          |
| 57                 | 42.00          | 44.00         | 40.5          | 37.70          |
| 58                 | 36.90          | 46.10         | 41.8          | 40.40          |
| Mean               | 39.20          | 43.10         | 42.54         | 40.90          |
| Median             | 40.00          | 43.50         | 42.05         | 41.05          |
| Standard deviation | 4.54           | 5.21          | 5.23          | 5.79           |

Table S7: Results for the paired differences between HCT ADM and HCT D4, HCT ADM and HCT D8 and HCT ADM and HCT DIS for the CONTROL group.

|                                     | <i>t</i> | DF | <i>p</i> -value | 95 % confidence interval |
|-------------------------------------|----------|----|-----------------|--------------------------|
| HCT-ADM CONTROL and HCT D4 CONTROL  | 2.9498   | 55 | 0.004663        | [0.4878045, 2.5550527]   |
| HCT-ADM CONTROL and HCT D8 CONTROL  | 4.2894   | 43 | 0.0001028       | [1.320401, 3.720508]     |
| HCT-ADM CONTROL and HCT DIS CONTROL | 4.69     | 57 | 1.75e-05        | [2.355380, 5.865309]     |

Table S8: Results for the paired differences between HCT ADM and HCT D4, HCT ADM and HCT D8 and HCT ADM and HCT DIS for the NEGBAL group.

|                                   | <i>t</i> | DF | <i>p</i> -value | 95 % confidence interval |
|-----------------------------------|----------|----|-----------------|--------------------------|
| HCT-ADM NEGBAL and HCT D4 NEGBAL  | -7.2295  | 54 | 1.746e-09       | [-4.976901, -2.815826]   |
| HCT-ADM NEGBAL and HCT D8 NEGBAL  | -6.9727  | 40 | 2.047e-08       | [-4.517636, -2.487242]   |
| HCT-ADM NEGBAL and HCT DIS NEGBAL | -2.5765  | 57 | 0.01259         | [-3.0120399, -0.3776153] |

Figure S3: Boxplot for HCT ADM, HCT D4, HCT D8 and HCT DIS for the CONTROL group.

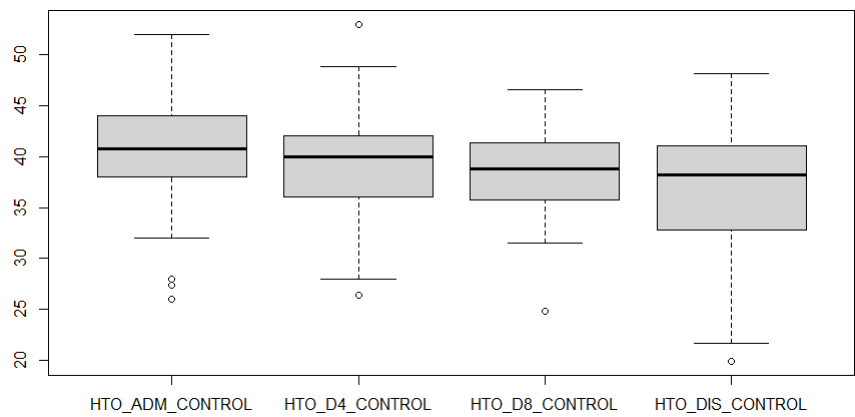

Figure S4: Boxplot for HCT ADM, HCT D4, HCT D8 and HCT DIS for the NEGBAL group.

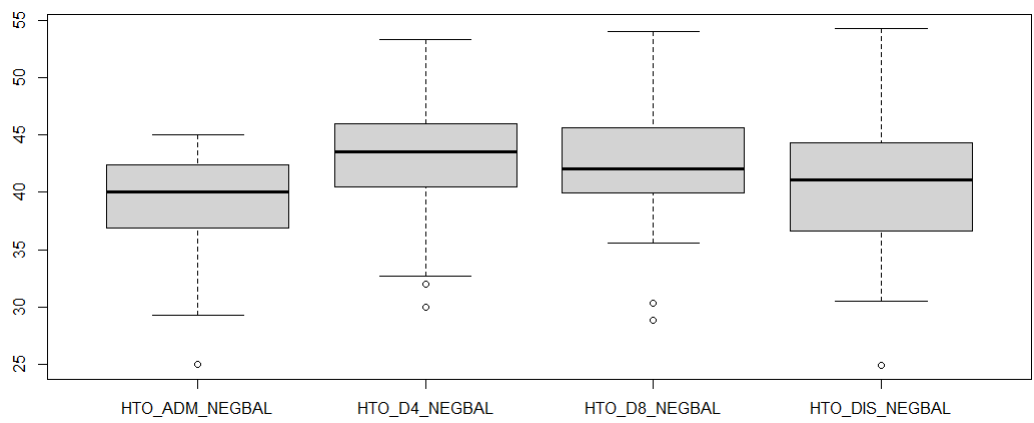

Figure S5: Boxplot for CREAT ADM, CREAT D4, CREAT D8 and CREAT DIS for the CONTROL group.

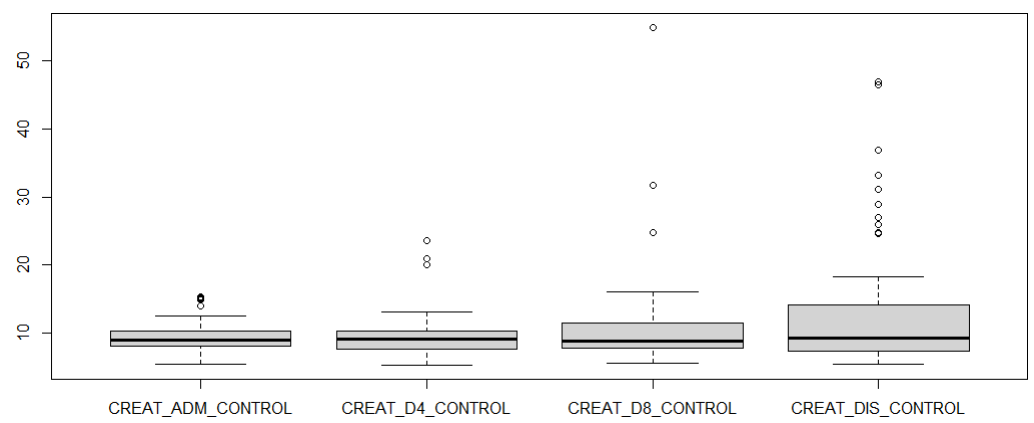

Table S9: Evolution of CREATININE CONTROL group

|                    | CREAT_ADM_CONTROL | CREAT_D4_CONTROL | CREAT_D8_CONTROL | CREAT_DIS_CONTROL |
|--------------------|-------------------|------------------|------------------|-------------------|
| 1                  | 10.00             | 11.00            | 10.00            | 6.60              |
| 2                  | 8.90              | 7.40             | 6.80             | 8.50              |
| 3                  | 14.80             | 10.90            | 9.40             | 9.10              |
| 4                  | 15.10             | -                | -                | 16.20             |
| 5                  | 9.00              | 10.00            | 8.50             | 11.40             |
| 6                  | 9.30              | 9.40             | -                | 9.40              |
| 7                  | 11.50             | 11.50            | -                | 13.90             |
| 8                  | 15.30             | 12.50            | 14.10            | 14.10             |
| 9                  | 11.00             | 10.30            | 11.00            | 10.50             |
| 10                 | 9.40              | 9.50             | -                | 10.10             |
| 11                 | 8.40              | 9.80             | -                | 9.80              |
| 12                 | 7.10              | 5.20             | 7.40             | 25.90             |
| 13                 | 9.70              | 13.00            | 16.00            | 27.00             |
| 14                 | 7.00              | 20.00            | 31.70            | 28.90             |
| 15                 | 9.00              | 9.00             | 12.60            | 36.90             |
| 16                 | 6.90              | 8.30             | 8.10             | 7.00              |
| 17                 | 9.30              | 7.60             | 7.30             | 7.00              |
| 18                 | 8.70              | 6.70             | 7.80             | 7.30              |
| 19                 | 6.20              | 8.30             | 7.90             | 7.30              |
| 20                 | 14.00             | 13.10            | 10.90            | 9.50              |
| 21                 | 8.40              | 8.50             | 8.90             | 6.10              |
| 22                 | 9.90              | 7.20             | 7.70             | 8.70              |
| 23                 | 8.50              | 9.80             | 9.60             | 10.40             |
| 24                 | 12.40             | 9.30             | 8.30             | 14.90             |
| 25                 | 9.80              | 9.90             | 9.30             | 10.40             |
| 26                 | 11.50             | 8.50             | 12.40            | 31.10             |
| 27                 | 8.30              | 7.00             | 8.30             | 8.20              |
| 28                 | 8.10              | 8.50             | 8.20             | 9.80              |
| 29                 | 10.10             | 9.90             | 8.60             | 8.80              |
| 30                 | 11.10             | 11.80            | 12.40            | 14.30             |
| 31                 | 15.00             | 23.60            | 55.00            | 46.50             |
| 32                 | 10.40             | 9.80             | 12.80            | 9.00              |
| 33                 | 10.30             | 11.90            | 12.10            | 18.30             |
| 34                 | 8.90              | 9.20             | -                | 10.30             |
| 35                 | 11.00             | 9.30             | 11.90            | 24.60             |
| 36                 | 10.60             | 8.50             | -                | 8.00              |
| 37                 | 7.10              | 8.40             | 8.80             | 9.10              |
| 38                 | 7.80              | 6.50             | -                | 7.20              |
| 39                 | 8.00              | 9.20             | 8.30             | 9.10              |
| 40                 | 6.80              | 6.00             | -                | 6.30              |
| 41                 | 14.90             | 20.90            | -                | 47.00             |
| 42                 | 7.20              | 7.30             | 8.20             | 7.80              |
| 43                 | 8.90              | 10.50            | 24.80            | 24.80             |
| 44                 | 6.10              | 6.90             | 6.30             | 6.30              |
| 45                 | 6.30              | 7.50             | 7.60             | 9.90              |
| 46                 | 6.50              | 8.00             | 8.20             | 8.50              |
| 47                 | 7.40              | 6.20             | -                | 6.40              |
| 48                 | 8.10              | 10.20            | 7.00             | 6.90              |
| 49                 | 10.10             | 7.60             | 8.80             | 8.80              |
| 50                 | 8.10              | 6.60             | 5.50             | 8.30              |
| 51                 | 8.90              | 9.10             | 9.30             | 9.60              |
| 52                 | 7.90              | 7.70             | 6.70             | 6.10              |
| 53                 | 5.40              | 5.20             | 7.80             | 5.80              |
| 54                 | 10.10             | 7.30             | 7.00             | 6.50              |
| 55                 | 9.00              | 12.60            | 11.00            | 33.20             |
| 56                 | 8.40              | 8.70             | 11.40            | 5.30              |
| 57                 | 9.60              | 8.10             | 10.60            | 9.30              |
| 58                 | 8.20              | -                | -                | 6.00              |
| Mean               | 9.41              | 9.58             | 11.14            | 13.17             |
| Median             | 8.95              | 9.05             | 8.80             | 9.20              |
| Standard deviation | 2.38              | 3.44             | 8.02             | 9.88              |

Table S10: Evolution of CREATININE NEGBAL group

|                    | CREAT ADM NEGBAL | CREAT D4 NEGBAL | CREAT D8 NEGBAL | CREAT DIS NEGBAL |
|--------------------|------------------|-----------------|-----------------|------------------|
| 1                  | 13.10            | 11.00           | 11.2            | 33.20            |
| 2                  | 6.00             | 4.70            | -               | 4.40             |
| 3                  | 8.20             | 8.90            | 7.9             | 7.20             |
| 4                  | 6.70             | 11.00           |                 | 11.20            |
| 5                  | 8.20             | 7.10            | 9.1             | 8.90             |
| 6                  | 6.90             | 7.10            | -               | 7.30             |
| 7                  | 6.10             | 7.10            | 12.2            | 8.50             |
| 8                  | 11.00            | 8.10            | 10.4            | 10.10            |
| 9                  | 6.00             | 8.10            | 9.4             | 9.40             |
| 10                 | 10.00            | 7.10            | 11.3            | 7.70             |
| 11                 | 9.10             | 8.80            | -               | 8.30             |
| 12                 | 10.30            | 10.10           | 11.5            | 10.40            |
| 13                 | 9.40             | 11.30           | 11              | 11.00            |
| 14                 | 9.00             | 10.60           | -               | 10.10            |
| 15                 | 11.10            | 13.00           | 10.8            | 10.00            |
| 16                 | 10.00            | 13.20           | -               | 10.70            |
| 17                 | 7.00             | 9.30            | 8.20            | 12.50            |
| 18                 | 9.00             | 12.60           | 13.7            | 10.40            |
| 19                 | 7.10             | 8.00            | 6.5             | 6.30             |
| 20                 | 9.50             | 9.80            | 10.20           | 10.20            |
| 21                 | 12.80            | 16.00           | -               | 15.20            |
| 22                 | 7.60             | 9.00            | -               | 10.00            |
| 23                 | 8.00             | 11.40           | 16              | 6.00             |
| 24                 | 6.00             | 6.60            | -               | 7.10             |
| 25                 | 10.20            | 12.40           | 18.3            | 31.80            |
| 26                 | 8.00             | 9.80            | 8.4             | 6.10             |
| 27                 | 7.50             | 10.30           | 8               | 6.80             |
| 28                 | 8.20             | 8.30            | 10.9            | 8.30             |
| 29                 | 6.40             | 10.20           | 8.1             | 8.10             |
| 30                 | 7.70             | 6.10            | 6.5             | 5.90             |
| 31                 | 11.90            | 11.10           | 12.1            | 11.20            |
| 32                 | 8.00             | 8.20            | 8.80            | 11.80            |
| 33                 | 6.10             | -               | -               | 5.80             |
| 34                 | 12.10            | 21.10           | -               | 19.30            |
| 35                 | 9.80             | 13.00           | 9.5             | 8.80             |
| 36                 | 11.00            | 16.00           | 19              | 18.60            |
| 37                 | 11.20            | 18.70           | 19.2            | 31.70            |
| 38                 | 6.20             | 7.80            | 7.2             | 6.50             |
| 39                 | 6.90             | 9.50            | 8.1             | 8.00             |
| 40                 | 8.40             | 9.40            | 8.6             | 8.50             |
| 41                 | 6.50             | 10.70           | 9.4             | 9.40             |
| 42                 | 6.60             | 10.80           | -               | 11.30            |
| 43                 | 11.00            | -               | -               | 12.00            |
| 44                 | 6.40             | 9.80            | 6.5             | 6.80             |
| 45                 | 8.00             | 11.00           | -               | 12.30            |
| 46                 | 8.30             | 14.20           | 16              | 10.10            |
| 47                 | 10.20            | 12.70           | 15.7            | 9.50             |
| 48                 | 9.80             | 11.40           | -               | 45.50            |
| 49                 | 8.20             | 7.70            | 6.2             | 7.00             |
| 50                 | 12.00            | 15.80           | 14.5            | 12.00            |
| 51                 | 5.20             | 8.10            | -               | 8.30             |
| 52                 | 8.00             | 13.00           | 24.5            | 4.20             |
| 53                 | 12.30            | 24.60           | 10.3            | 12.30            |
| 54                 | 7.50             | -               | 9               | 8.00             |
| 55                 | 10.60            | 19.70           | 18.5            | 38.40            |
| 56                 | 10.50            | 18.30           | 13.8            | 11.20            |
| 57                 | 9.00             | 15.00           | 12              | 8.50             |
| 58                 | 9.70             | 7.00            | 7.5             | 6.70             |
| Mean               | 8.75             | 11.12           | 11.33           | 11.67            |
| Median             | 8.25             | 10.30           | 10.35           | 9.45             |
| Standard deviation | 2.01             | 3.98            | 4.16            | 8.23932          |

Table S11: Results for the paired differences between CREAT ADM and CREAT D4, CREAT ADM and CREAT D8 andCREAT ADM and CREAT DIS for the CONTROL group.

|                                         | <i>t</i> | DF | <i>p</i> -value | 95 % confidence interval |
|-----------------------------------------|----------|----|-----------------|--------------------------|
| CREAT-ADM CONTROL and CREAT D4 CONTROL  | -0.68831 | 55 | 0.4942          | [-0.9988438, 0.4881295]  |
| CREAT-ADM CONTROL and CREAT D8 CONTROL  | -1.6794  | 45 | 0.1             | [-4.0591368, 0.3678324]  |
| CREAT-ADM CONTROL and CREAT DIS CONTROL | -3.132   | 57 | 0.00274         | [-6.170210, -1.357376]   |

Table S12: Results for the paired differences between CREAT ADM and CREAT D4, CREAT ADM and CREAT D8 andCREAT ADM and CREAT DIS for the NEGBAL group.

|                                       | <i>t</i> | DF | <i>p</i> -value | 95 % confidence interval |
|---------------------------------------|----------|----|-----------------|--------------------------|
| CREAT-ADM NEGBAL and CREAT D4 NEGBAL  | -5.6302  | 54 | 6.632e-07       | [-3.173263, -1.506737]   |
| CREAT-ADM NEGBAL and CREAT D8 NEGBAL  | -4.1396  | 41 | 0.0001689       | [-3.592123, -1.236448]   |
| CREAT-ADM NEGBAL and CREAT DIS NEGBAL | -2.9788  | 57 | 0.004246        | [-4.881223, -0.956708]   |

Figure S6: Boxplot for CREAT ADM, CREAT D4, CREAT D8 and CREAT DIS for the NEGBAL group.

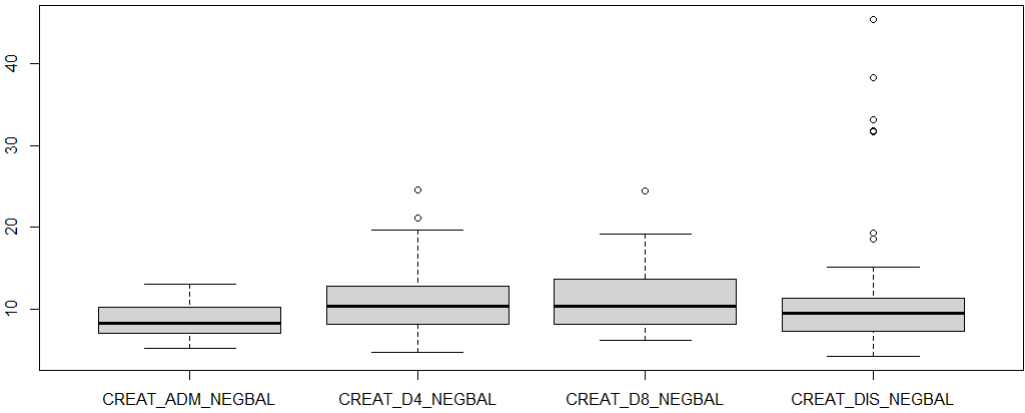

Table S13: CTSCORE previous to the treatment and on the day of admission, the fourth, the eight and the twelfth days for the CONTROL group.

|                    | CTSCORE PRE<br>CONTROL | CTSCORE ADM<br>CONTROL | CTSCORE D4<br>CONTROL | CTSCORE D8<br>CONTROL | CTSCORE D12<br>CONTROL |
|--------------------|------------------------|------------------------|-----------------------|-----------------------|------------------------|
| 1                  | -                      | 17.00                  | -                     | -                     | 8.00                   |
| 2                  | -                      | 19.00                  | 15.00                 | -                     | -                      |
| 3                  | -                      | 21.00                  | -                     | 22.00                 | 22.00                  |
| 4                  | 11.00                  | 13.00                  | -                     | -                     | -                      |
| 5                  | 22.00                  | 24.00                  | 24.00                 | -                     | -                      |
| 6                  | -                      | 10.00                  | -                     | -                     | -                      |
| 7                  | 14.00                  | 14.00                  | -                     | -                     | -                      |
| 8                  | 8.00                   | 8.00                   | -                     | -                     | -                      |
| 9                  | -                      | -                      | 12.00                 | -                     | -                      |
| 10                 | -                      | 5.00                   | -                     | -                     | -                      |
| 11                 | -                      | 12.00                  | 10.00                 | -                     | -                      |
| 12                 | 4.00                   | 20.00                  | -                     | -                     | -                      |
| 13                 | 8.00                   | 13.00                  | -                     | -                     | 10.00                  |
| 14                 | 0.00                   | 10.00                  | -                     | -                     | 24.00                  |
| 15                 | -                      | 25.00                  | -                     | -                     | 17.00                  |
| 16                 | 10.00                  | 15.00                  | 15.00                 | -                     | 13.00                  |
| 17                 | -                      | -                      | -                     | 11.00                 | -                      |
| 18                 | 10.00                  | 14.00                  | -                     | 22.00                 | -                      |
| 19                 | 10.00                  | 16.00                  | -                     | 11.00                 | 13.00                  |
| 20                 | -                      | 13.00                  | 13.00                 | -                     | 11.00                  |
| 21                 | -                      | 13.00                  | 15.00                 | 11.00                 | -                      |
| 22                 | -                      | 19.00                  | -                     | 21.00                 | 23.00                  |
| 23                 | -                      | 14.00                  | 13.00                 | -                     | 12.00                  |
| 24                 | 7.00                   | 15.00                  | -                     | -                     | 14.00                  |
| 25                 | -                      | 16.00                  | 20.00                 | -                     | -                      |
| 26                 | -                      | 9.00                   | -                     | -                     | -                      |
| 27                 | 13.00                  | 20.00                  | 18.00                 | -                     | -                      |
| 28                 | 5.00                   | 17.00                  | 20.00                 | 20.00                 | 23.00                  |
| 29                 | -                      | 15.00                  | 14.00                 | 13.00                 | 15.00                  |
| 30                 | -                      | 16.00                  | -                     | 24.00                 | -                      |
| 31                 | 16.00                  | 22.00                  | -                     | -                     | -                      |
| 32                 | 15.00                  | 18.00                  | -                     | -                     | 11.00                  |
| 33                 | -                      | 19.00                  | -                     | 14.00                 | -                      |
| 34                 | -                      | 19.00                  | 20.00                 | -                     | -                      |
| 35                 | 6.00                   | 13.00                  | -                     | -                     | -                      |
| 36                 | 18.00                  | 18.00                  | -                     | -                     | -                      |
| 37                 | 11.00                  | 20.00                  | -                     | 20.00                 | -                      |
| 38                 | 9.00                   | 15.00                  | 10.00                 | -                     | -                      |
| 39                 | -                      | 19.00                  | 24.00                 | -                     | -                      |
| 40                 | 13.00                  | 24.00                  | 20.00                 | -                     | -                      |
| 41                 | -                      | -                      | -                     | -                     | -                      |
| 42                 | -                      | 20.00                  | 21.00                 | 20.00                 | -                      |
| 43                 | -                      | 14.00                  | -                     | -                     | -                      |
| 44                 | -                      | 17.00                  | -                     | -                     | -                      |
| 45                 | 12.00                  | 14.00                  | 11.00                 | -                     | -                      |
| 46                 | -                      | 17.00                  | -                     | 17.00                 | 17.00                  |
| 47                 | -                      | 14.00                  | 14.00                 | -                     | -                      |
| 48                 | -                      | 19.00                  | -                     | 20.00                 | 16.00                  |
| 49                 | 9.00                   | 11.00                  | -                     | 4.00                  | -                      |
| 50                 | 1.00                   | 16.00                  | -                     | -                     | 14.00                  |
| 51                 | -                      | 21.00                  | 18.00                 | 8.00                  | -                      |
| 52                 | -                      | -                      | -                     | -                     | -                      |
| 53                 | -                      | 11.00                  | -                     | -                     | -                      |
| 54                 | -                      | 16.00                  | -                     | -                     | 17.00                  |
| 55                 | -                      | 12.00                  | -                     | -                     | 13.00                  |
| 56                 | -                      | 11.00                  | -                     | -                     | -                      |
| 57                 | 8.00                   | 15.00                  | 19.00                 | 20.00                 | 19.00                  |
| 58                 | -                      | 17.00                  | -                     | -                     | -                      |
| Mean               | 10.00                  | 15.83                  | 16.48                 | 16.35                 | 15.60                  |
| Median             | 10.00                  | 16.00                  | 15.00                 | 20.00                 | 14.50                  |
| Standard deviation | 5.06                   | 4.14                   | 4.31                  | 5.79                  | 4.64                   |



Table S14: CTSCORE previous to the treatment and on the day of admission, the fourth, the eight and the twelfth days forthe NEGBAL group.

|                       | CTSCORE PRE<br>NEGBAL | CTSCORE ADM<br>NEGBAL | CTSCORE D4<br>NEGBAL | CTSCORE D8<br>NEGBAL | CTSCORE D12<br>NEGBAL |
|-----------------------|-----------------------|-----------------------|----------------------|----------------------|-----------------------|
| 1                     | 6                     | 21.00                 | -                    | 7                    | -                     |
| 2                     | -                     | 13.00                 | 8                    | -                    | 4                     |
| 3                     | 12                    | 20.00                 | 3                    | -                    | -                     |
| 4                     | 5                     | 17.00                 | 1                    | -                    | -                     |
| 5                     | 10                    | 17.00                 | 17                   | 7                    | -                     |
| 6                     | 7                     | 14.00                 | 10                   | -                    | -                     |
| 7                     | 10                    | 23.00                 | 23                   | 16                   | -                     |
| 8                     | 8                     | 19.00                 | 5                    | -                    | -                     |
| 9                     | 9                     | 18.00                 | 12                   | -                    | -                     |
| 10                    | -                     | 25.00                 | 25                   | 25                   | 25                    |
| 11                    | -                     | 12.00                 | 2                    | 0                    | -                     |
| 12                    | 10                    | 20.00                 | 10                   | 3                    | -                     |
| 13                    | 2                     | 16.00                 | 9                    | 5                    | -                     |
| 14                    | 6                     | 11.00                 | 3                    | -                    | -                     |
| 15                    | -                     | 22.00                 | 18                   | 14                   | 12                    |
| 16                    | 1                     | 12.00                 | 10                   | 9                    | -                     |
| 17                    | -                     | 17.00                 | 12                   | 7                    | -                     |
| 18                    | -                     | 17.00                 | 17                   | 16                   | -                     |
| 19                    | -                     | 11.00                 | 6                    | 5                    | -                     |
| 20                    | -                     | 19.00                 | 8                    | 5                    | -                     |
| 21                    | 8                     | 19.00                 | 11                   | 11                   | -                     |
| 22                    | -                     | 15.00                 | 4                    | -                    | -                     |
| 23                    | -                     | 15.00                 | 8                    | 8                    | -                     |
| 24                    | 3                     | 6.00                  | 2                    | -                    | -                     |
| 25                    | -                     | 18.00                 | 21                   | 20                   | -                     |
| 26                    | 8                     | 10.00                 | 4                    | 3                    | -                     |
| 27                    | 12                    | 21.00                 | 12                   | 5                    | -                     |
| 28                    | -                     | 7.00                  | 6                    | 6                    | -                     |
| 29                    | -                     | 17.00                 | 15                   | 9                    | 8                     |
| 30                    | -                     | 23.00                 | 15                   | 13                   | -                     |
| 31                    | -                     | 20.00                 | 16                   | 9                    | -                     |
| 32                    | -                     | 15.00                 | 15                   | 12                   | 5                     |
| 33                    | -                     | 7.00                  | 2                    | -                    | -                     |
| 34                    | -                     | 10.00                 | 10                   | 5                    | -                     |
| 35                    | -                     | 10.00                 | 4                    | 2                    | -                     |
| 36                    | -                     | 17.00                 | -                    | 8                    | -                     |
| 37                    | -                     | 7.00                  | 19                   | -                    | 23                    |
| 38                    | -                     | 15.00                 | 11                   | 9                    | -                     |
| 39                    | -                     | 11.00                 | 6                    | -                    | -                     |
| 40                    | 15                    | 24.00                 | 22                   | 21                   | 10                    |
| 41                    | -                     | 8.00                  | 4                    | 2                    | -                     |
| 42                    | -                     | 13.00                 | 6                    | -                    | -                     |
| 43                    | 8                     | 13.00                 | 9                    | -                    | -                     |
| 44                    | -                     | 10.00                 | 8                    | 8                    | -                     |
| 45                    | -                     | 11.00                 | 9                    | 6                    | -                     |
| 46                    | -                     | 21.00                 | 16                   | 15                   | -                     |
| 47                    | -                     | 21.00                 | 10                   | 5                    | -                     |
| 48                    | -                     | 21.00                 | -                    | -                    | -                     |
| 49                    | -                     | 9.00                  | 6                    | 2                    | -                     |
| 50                    | -                     | 20.00                 | 16                   | 11                   | -                     |
| 51                    | -                     | 14.00                 | 12                   | 8                    | -                     |
| 52                    | -                     | 19.00                 | 15                   | -                    | -                     |
| 53                    | -                     | 25.00                 | 17                   | 11                   | -                     |
| 54                    | -                     | 15.00                 | 15                   | -                    | -                     |
| 55                    | -                     | 8.00                  | 3                    | 2                    | -                     |
| 56                    | -                     | 14.00                 | 14                   | 13                   | -                     |
| 57                    | -                     | 12.00                 | 9                    | 8                    | -                     |
| 58                    | 12                    | 21.00                 | 16                   | -                    | 12                    |
| Mean                  | 8.00                  | 15.62                 | 10.67                | 8.77                 | 12.38                 |
| Median                | 8.00                  | 15.50                 | 10.00                | 8.00                 | 11.00                 |
| Standard<br>deviation | 3.64                  | 5.08                  | 5.96                 | 5.57                 | 7.76                  |

Table S 15: Results for the paired differences between CTSCORE PRE and CTSCORE ADM, CTSCORE ADM andCTSCORE D4, CTSCORE ADM and CTSCORE D8 and CTSCORE ADM CTSCORE D12 for the CONTROL group.

|                                             | <i>t</i> | DF | <i>p</i> -value | 95 % confidence interval |
|---------------------------------------------|----------|----|-----------------|--------------------------|
| CTSCORE PRE CONTROL and CTSCORE ADM CONTROL | -6.6114  | 23 | 9.572e-07       | [-7.932050, -4.151283]   |
| CTSCORE ADM CONTROL and CTSCORE D4 CONTROL  | 0.3905   | 19 | 0.7005          | [-1.089974, 1.589974]    |
| CTSCORE ADM CONTROL and CTSCORE D8 CONTROL  | 0.27641  | 15 | 0.786           | [-2.51673, 3.26673]      |
| CTSCORE ADM CONTROL and CTSCORE D12 CONTROL | 0.47998  | 19 | 0.6367          | [ -1.848341, 2.948341]   |

Table S 16: Results for the paired differences between CTSCORE PRE and CTSCORE ADM, CTSCORE ADM andCTSCORE D4, CTSCORE ADM and CTSCORE D8 and CTSCORE ADM CTSCORE D12 for the NEGBAL group.

|                                           | <i>t</i> | DF | <i>p</i> -value | 95 % confidence interval |
|-------------------------------------------|----------|----|-----------------|--------------------------|
| CTSCORE PRE NEGBAL and CTSCORE ADM NEGBAL | -11.032  | 18 | 1.929e-09       | [-10.651242, -7.243495]  |
| CTSCORE ADM NEGBAL and CTSCORE D4 NEGBAL  | 7.4157   | 54 | 8.707e-10       | [3.449224, 6.005321]     |
| CTSCORE ADM NEGBAL and CTSCORE D8 NEGBAL  | 10.09    | 39 | 1.983e-12       | [ 5.896615, 8.853385]    |
| CTSCORE ADM NEGBAL and CTSCORE D12 NEGBAL | 1.6615   | 7  | 0.1406          | [-2.38059, 13.63059]     |

Figure S 7: Boxplot for CTSCORE PRE, CTSCORE ADM, CTSCORE D4, CTSCORE D8 and CTSCORE D12 for the CONTROL group.

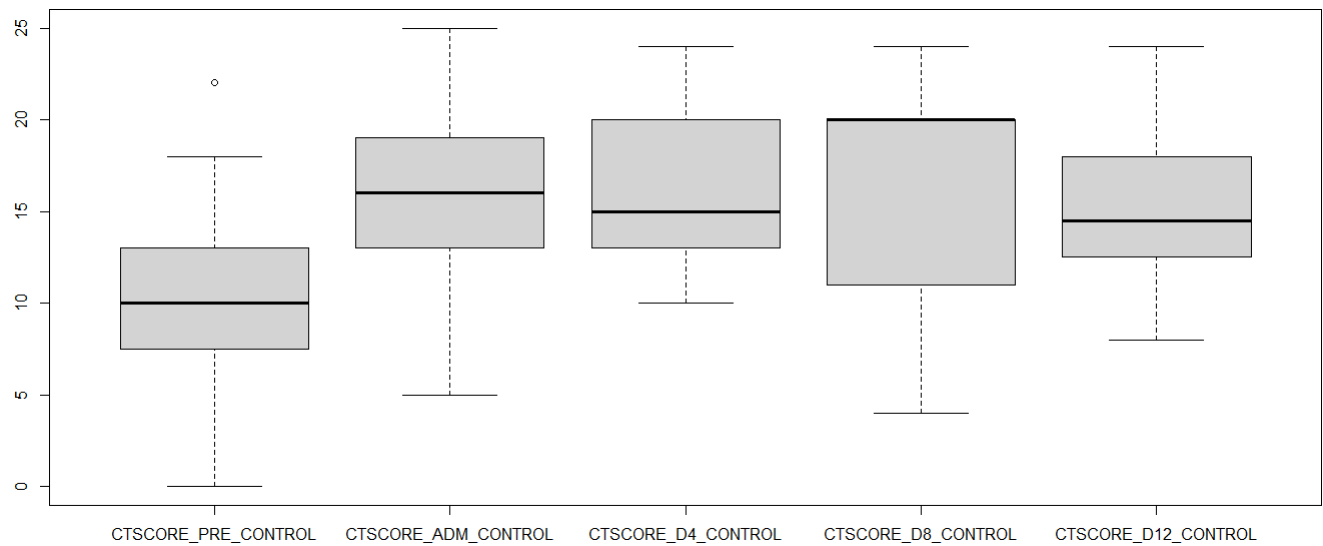

Figure S8: Boxplot for CTSCORE PRE, CTSCORE ADM, CTSCORE D4, CTSCORE D8 and CTSCORE D12 for the NEGBAL group.

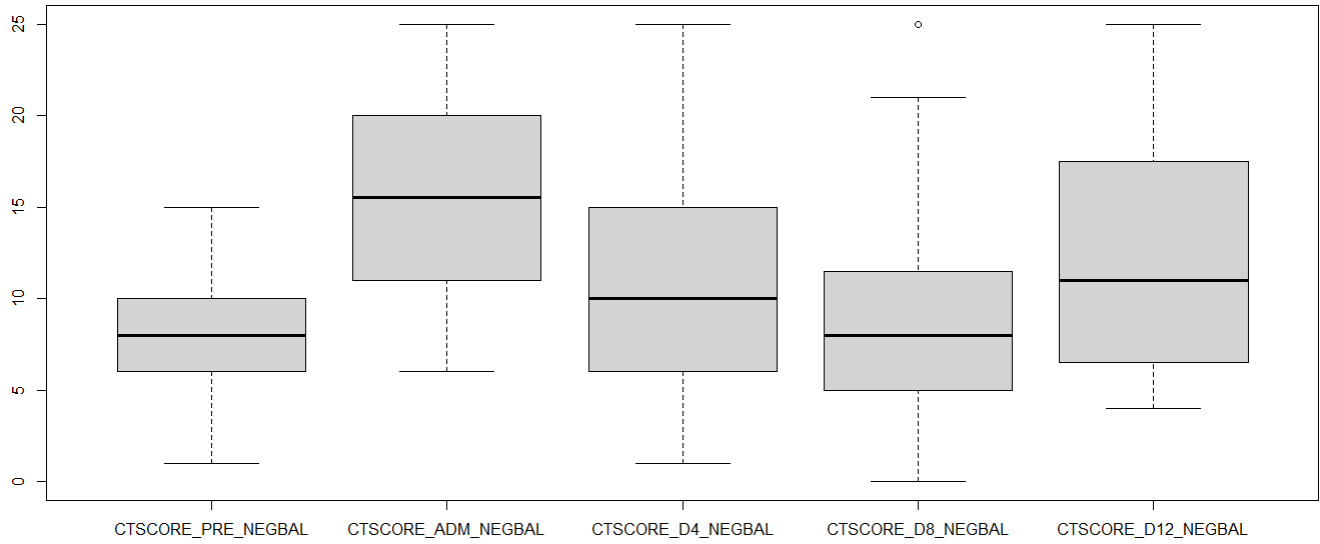

Figure S9: Boxplot for SVC PRE, SVC ADM, SVC D4, SVC D8 and SVC D12 for the CONTROL group.

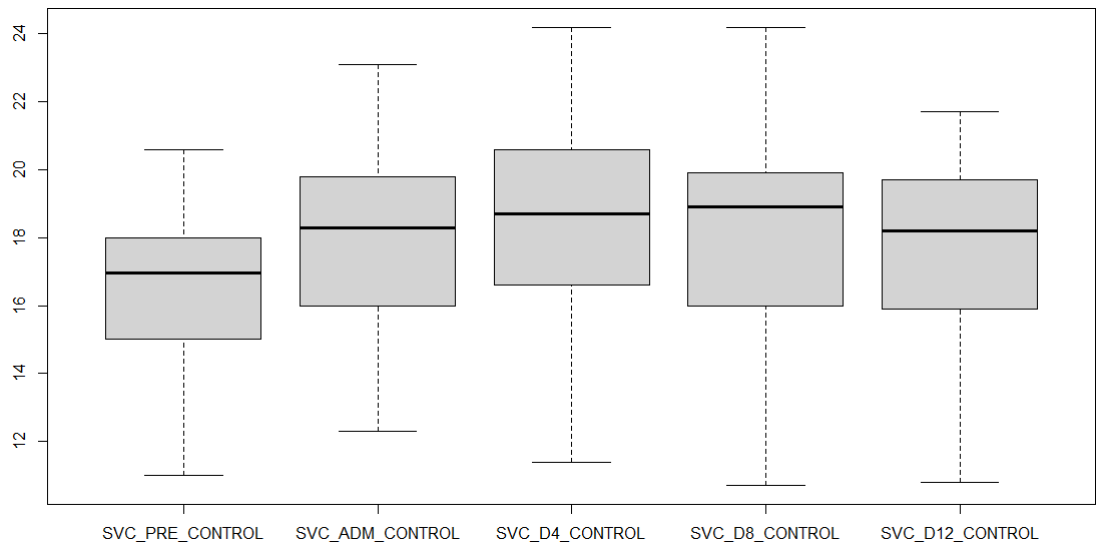

Table S17: SVC previous to the treatment and on the day of admission, the fourth, the eight and the twelfth days for the CONTROL group

|                    | SVC PRE CONTROL | SVC ADM CONTROL | SVC D4 CONTROL | SVC D8 CONTROL | SVC D12 CONTROL |
|--------------------|-----------------|-----------------|----------------|----------------|-----------------|
| 1                  | -               | 12.60           | -              | -              | 10.80           |
| 2                  | -               | 19.70           | 16.40          | -              | -               |
| 3                  | -               | 19.10           | -              | 19.00          | 19.80           |
| 4                  | 17.80           | 18.40           | -              | -              | -               |
| 5                  | 20.60           | 21.40           | 18.70          | -              | -               |
| 6                  | -               | 17.80           | -              | -              | -               |
| 7                  | 18.10           | 18.30           | -              | -              | -               |
| 8                  | 16.00           | 16.00           | -              | -              | -               |
| 9                  | -               | -               | 23.50          | -              | -               |
| 10                 | -               | 12.30           | -              | -              | -               |
| 11                 | -               | 15.40           | 11.40          | -              | -               |
| 12                 | 11.30           | 18.10           | -              | -              | -               |
| 13                 | 17.00           | 18.60           | -              | -              | 19.00           |
| 14                 | 12.60           | 14.90           | -              | -              | 21.70           |
| 15                 | -               | 13.60           | -              | -              | 15.20           |
| 16                 | 16.00           | 17.40           | 16.10          | -              | 14.90           |
| 17                 | -               | -               | -              | 13.90          | -               |
| 18                 | 17.90           | 16.50           | -              | 20.60          | -               |
| 19                 | 14.80           | 20.20           | -              | 21.20          | 19.30           |
| 20                 | -               | 19.80           | 20.60          | -              | 19.60           |
| 21                 | -               | 22.00           | 23.90          | 20.00          | -               |
| 22                 | -               | 15.30           | -              | 10.70          | 16.10           |
| 23                 | -               | 15.90           | 18.00          | -              | 17.50           |
| 24                 | 16.90           | 19.00           | -              | -              | 16.70           |
| 25                 | -               | 16.00           | 18.70          | -              | -               |
| 26                 | -               | 14.70           | -              | -              | -               |
| 27                 | 16.10           | 17.50           | 18.00          | -              | -               |
| 28                 | 15.20           | 19.50           | 19.70          | 19.90          | 20.30           |
| 29                 | -               | 18.90           | 16.60          | 16.50          | 17.80           |
| 30                 | -               | 17.10           | -              | 18.10          | -               |
| 31                 | 18.10           | 18.70           | -              | -              | -               |
| 32                 | 18.30           | 23.10           | -              | -              | 14.30           |
| 33                 | -               | 18.10           | -              | 15.40          | -               |
| 34                 | -               | 18.00           | 20.20          | -              | -               |
| 35                 | 11.20           | 21.20           | -              | -              | -               |
| 36                 | 15.00           | 15.50           | -              | -              | -               |
| 37                 | 11.00           | 17.30           | -              | 12.10          | -               |
| 38                 | 17.10           | 17.90           | 14.80          | -              | -               |
| 39                 | -               | 22.80           | 20.80          | -              | -               |
| 40                 | 17.80           | 18.30           | 16.30          | -              | -               |
| 41                 | -               | -               | -              | -              | -               |
| 42                 | -               | 22.50           | 24.20          | 24.20          | -               |
| 43                 | -               | 18.50           | -              | -              | -               |
| 44                 | -               | 18.70           | -              | -              | -               |
| 45                 | 18.60           | 19.90           | 19.90          | -              | -               |
| 46                 | -               | 20.20           | -              | 19.10          | 18.60           |
| 47                 | -               | 21.00           | 21.60          | -              | -               |
| 48                 | -               | 21.50           | -              | 18.70          | 15.70           |
| 49                 | 18.60           | 18.70           | -              | 16.00          | -               |
| 50                 | 15.00           | 21.20           | -              | -              | 19.20           |
| 51                 | -               | 21.60           | 19.30          | 18.90          | -               |
| 52                 | -               | -               | -              | -              | -               |
| 53                 | -               | 17.20           | -              | -              | -               |
| 54                 | -               | 16.90           | -              | -              | 19.90           |
| 55                 | -               | 15.20           | -              | -              | 16.60           |
| 56                 | -               | 16.00           | -              | -              | -               |
| 57                 | 17.80           | 19.00           | 18.60          | 19.80          | 20.50           |
| 58                 | -               | 14.10           | -              | -              | -               |
| Mean               | 16.20           | 18.13           | 18.92          | 17.89          | 17.68           |
| Median             | 16.95           | 18.30           | 18.7           | 18.90          | 18.20           |
| Standard deviation | 2.55            | 2.55            | 3.10           | 3.42           | 2.64            |

Table S18: SVC previous to the treatment and on the day of admission, the fourth, the eight and the twelfth days for theNEGBAL group.

|                    | SVC-PRE NEGBAL | SVC-ADM NEGBAL | SVC-D4 NEGBAL | SVC-D8 NEGBAL | SVC-D12 NEGBAL |
|--------------------|----------------|----------------|---------------|---------------|----------------|
| 1                  | 17.1           | 18.9           | -             | 16.8          | -              |
| 2                  | -              | 19.1           | 16.4          | -             | 15.00          |
| 3                  | 18.4           | 25.2           | 12.4          | -             | -              |
| 4                  | 12.5           | 16.7           | 11.4          | -             | -              |
| 5                  | 15.1           | 18.3           | 17.4          | 15.9          | -              |
| 6                  | 13.9           | 20.1           | 15.5          | -             | -              |
| 7                  | 22.7           | 25.4           | 26.5          | 17.2          | -              |
| 8                  | 8.3            | 20.2           | 13.2          | -             | -              |
| 9                  | 19.2           | 20.9           | 19.4          | -             | -              |
| 10                 | -              | 18.3           | 19.4          | 17.4          | 18.2           |
| 11                 | -              | 12.3           | 5.5           | 8.1           | -              |
| 12                 | 12.8           | 19.5           | 13.6          | 12.5          | -              |
| 13                 | 10.7           | 14.5           | 10.8          | 8.1           | -              |
| 14                 | 17.1           | 14.4           | 12.2          | -             | -              |
| 15                 | -              | 15.9           | 15.1          | 15            | 15.6           |
| 16                 | 9.5            | 10.4           | 13.9          | 12.6          | -              |
| 17                 | -              | 17.1           | 10.8          | 14.4          | -              |
| 18                 | -              | 16.1           | 15.5          | -             | -              |
| 19                 | -              | 20             | 9.1           | 15.9          | -              |
| 20                 | -              | 14.2           | 10.1          | 9.5           | -              |
| 21                 | 15.1           | 16.4           | 11.8          | 10.26         | -              |
| 22                 | -              | 19.5           | 9.4           | -             | -              |
| 23                 | -              | 15             | 13.9          | 13.5          | -              |
| 24                 | 13.7           | 14.9           | 8.3           | -             | -              |
| 25                 | -              | 14.6           | 14.1          | 14.1          | -              |
| 26                 | 13             | 12.4           | 10.2          | 10.3          | -              |
| 27                 | 17.6           | 22.2           | 15.7          | 13.6          | -              |
| 28                 | -              | 15.6           | 12.8          | 15.6          | -              |
| 29                 | -              | 22             | 17.8          | 10.3          | 12.6           |
| 30                 | -              | 18.9           | 16            | 16.2          | -              |
| 31                 | -              | 15             | 11            | 9.5           | -              |
| 32                 | -              | 13.6           | 13.1          | 9.4           | 6.5            |
| 33                 | -              | 11.8           | 7.2           | -             | -              |
| 34                 | -              | 20             | 16.8          | 15.7          | -              |
| 35                 | -              | 15.5           | 7             | 8.3           | -              |
| 36                 | -              | 18.1           | -             | 12.9          | -              |
| 37                 | -              | 12.6           | 15.9          | -             | 15.3           |
| 38                 | -              | 16.2           | 15.9          | 12.2          | -              |
| 39                 | -              | 14             | 10.7          | -             | -              |
| 40                 | 19.6           | 19.3           | 18.7          | 18.7          | 19.5           |
| 41                 | -              | 13.2           | 9.6           | 6.3           | -              |
| 42                 | -              | 18             | 13.1          | -             | -              |
| 43                 | 13.3           | 16.7           | 16.2          | -             | -              |
| 44                 | -              | 15.1           | 14.6          | 13.4          | -              |
| 45                 | -              | 13,3           | 6.8           | 6.8           | -              |
| 46                 | -              | 21             | 18.8          | 18.7          | -              |
| 47                 | -              | 19.9           | 8.9           | 10.8          | -              |
| 48                 | -              | 18             | -             | -             | -              |
| 49                 | -              | 15.6           | 10.9          | 8.7           | -              |
| 50                 | -              | 14.8           | 12.3          | 11.5          | -              |
| 51                 | -              | 12.4           | 11.7          | 8.2           | -              |
| 52                 | -              | 19.7           | 18.9          | -             | -              |
| 53                 | -              | 20.9           | 16.4          | 14.8          | -              |
| 54                 | -              | 19.4           | 19            | -             | -              |
| 55                 | -              | 18.4           | 18.2          | 16.7          | -              |
| 56                 | -              | 16.9           | 19.1          | 14.5          | -              |
| 57                 | -              | 19.1           | 14.4          | 11.3          | -              |
| 58                 | 15.8           | 22.3           | 19.4          | -             | 17.8           |
| Mean               | 15.02          | 17.31          | 13.87         | 12.71         | 15.06          |
| Median             | 15.10          | 17.10          | 13.9          | 12.9          | 15.45          |
| Standard deviation | 3.65           | 3.29           | 4.09          | 3.43          | 4.08           |

Table S19: Results for the paired differences between SVC PRE and SVC ADM, SVC ADM and SVC D4, SVC ADM and SVC D8 and SVC ADM SVC D12 for the CONTROL group.

|                                       | <i>t</i> | DF | <i>p</i> -value | 95 % confidence interval |
|---------------------------------------|----------|----|-----------------|--------------------------|
| SVC- PRE- CONTROL and SVC ADM CONTROL | -4.2212  | 23 | 0.0003244       | [-3.588564, -1.228103]   |
| SVC- ADM CONTROL and SVC D4 CONTROL   | 1.1459   | 19 | 0.266           | [-0.4421572, 1.5121572]  |
| SVC- ADM CONTROL and SVC D8 CONTROL   | 1.7399   | 15 | 0.1023          | [-0.2433132, 2.4058132]  |
| SVC- ADM CONTROL and SVC D12 CONTROL  | 0.58265  | 19 | 0.567           | [-1.088736, 1.928736]    |

Table S20: Results for the paired differences between SVC PRE and SVC ADM, SVC ADM and SVC D4, SVC ADM and SVC D8 and SVC ADM SVC D12 for the NEGBAL group.

|                                     | <i>t</i> | DF | <i>p</i> -value | 95 % confidence interval |
|-------------------------------------|----------|----|-----------------|--------------------------|
| SVC- PRE- NEGBAL and SVC ADM NEGBAL | -4.3277  | 18 | 0.0004054       | [-4.948927, -1.714231]   |
| SVC- ADM NEGBAL and SVC D4 NEGBAL   | 6.9104   | 53 | 6.286e-09       | [2.305374, 4.190923]     |
| SVC- ADM NEGBAL and SVC D8 NEGBAL   | 8.6346   | 37 | 2.139e-10       | [3.183007, 5.134887]     |
| SVC- ADM NEGBAL and SVC D12 NEGBAL  | 1.9346   | 7  | 0.09429         | [-0.6280079, 6.2780079]  |

Figure S10: Boxplot for SVC PRE, SVC ADM, SVC D4, SVC D8 and SVC D12 for the NEGBAL group.

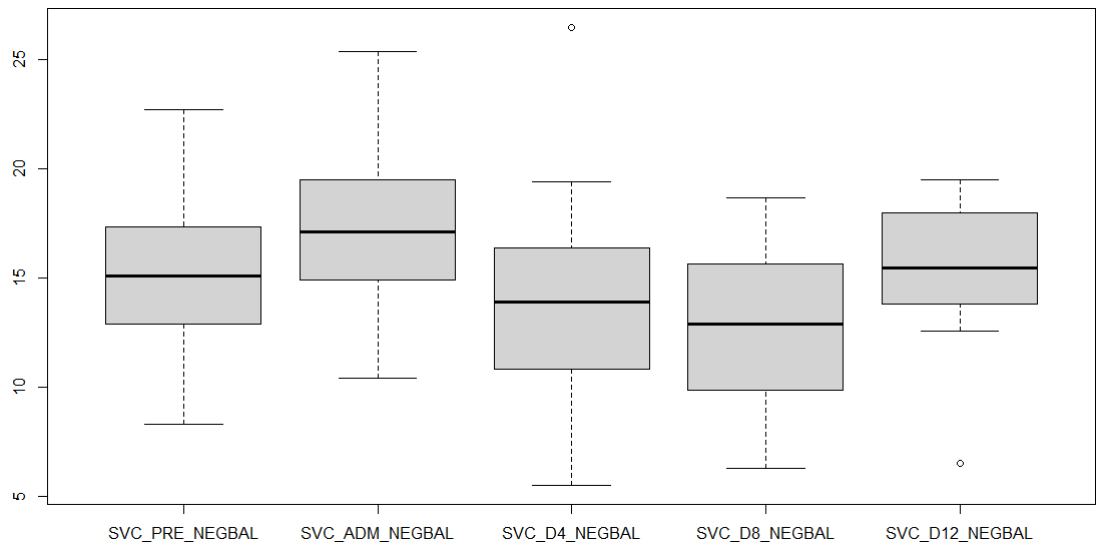

Table S21: Results for the paired differences of PAFI D4, PAFI D8 and PAFI DIS between groups.

|                                      | <i>t</i> | DF     | <i>p</i> -value | 95 % confidence interval |
|--------------------------------------|----------|--------|-----------------|--------------------------|
| PAFI-D4 CONTROL and PAFI D4 NEGBAL   | -4.0626  | 107.41 | 9.254e-05       | [-109.83894, -37.80063]  |
| PAFI-D8 CONTROL and PAFI D8 NEGBAL   | -5.3513  | 84.538 | 7.352e-07       | [-146.85990, -67.28795]  |
| PAFI-DIS CONTROL and PAFI DIS NEGBAL | -5.0011  | 111.65 | 2.135e-06       | [-141.13147, -61.03357]  |

Figure S11: Boxplot for PAFI\_D4 CONTROL and PAFI\_D4 NEGBAL.

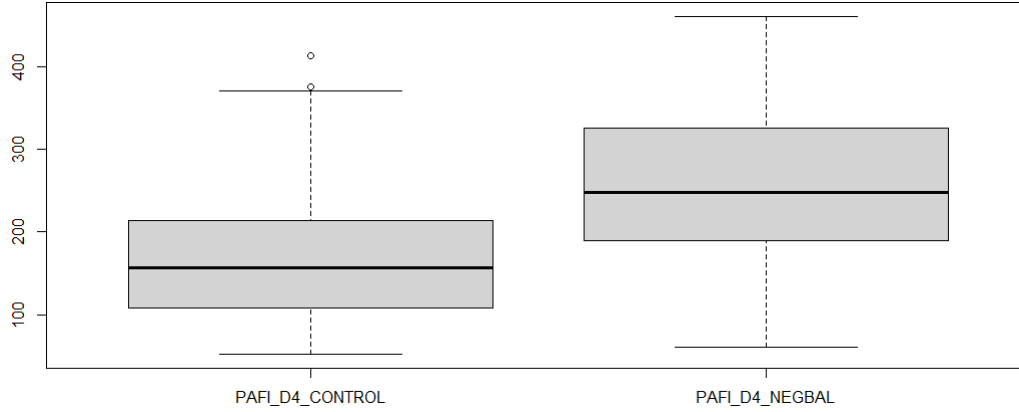

### 3.2 Day by day comparison

Table 21 contains the results for the paired differences between PAFI D4, PAFI D8 and PAFI DIS between the groups. The boxplots for each of these moments are in Figures 11, 12 and 13 respectively.

Table 22 contains the results for the paired differences between HCT D4, HCT D8 and HCT DIS between the groups.

The boxplots for each of these moments are in Figures 14, 15 and 16 respectively.

Table 23 contains the results for the paired differences between CREAT D4, CREAT D8 and CREAT DIS between the groups. The boxplots for each of these moments are in Figures 17, 18 and 19 respectively.

Table 24 contains the data of LEUC for the CONTROL and NEGBAL groups; the results for the paired differences can be found in Table 25 and the corresponding boxplot in Figure 20.

Table 26 contains the results for the paired differences between CTSCORE ADM, CTSCORE D4, CTSCORE D8 and CTSCORE D12 between the groups. The boxplots for each of these moments are in Figures 21, 22, 23 and 24 respectively.

Table 27 contains the results for the paired differences between SVC ADM, SVC D4, SVC D8 and SVC D12 between the groups. The boxplots for each of these moments are in Figures 25, 26, 27 and 28 respectively.

Tables 28 and 31 contain, respectively, the data of ACC HYD BAL for the CONTROL and NEGBAL groups; the results for the paired differences can be found in Table 32 and the corresponding boxplot in Figure 29. We point out the presence of one outlier in ACC HYD BAL CONTROL. The data of ACC HYD BAL for survivors of the CONTROL group can be found in Table 29 and for nonsurvivors in Table 30.

Tables 33 and 34 contain, respectively, the data of hospitalization days for the CONTROL and NEGBAL groups; the results for the paired differences can be found in Table 35 and the corresponding boxplot in Figures 30, 31 and 32 (for DAYS INT, ICU DAYS and DAYS MiV respectively). We point out the presence of outliers: HOSP DAYS CONTROL (1), HOSP DAYS NEGBAL (6), ICU DAYS NEGBAL (3), DAYS MiV NEGBAL (1).

Table 37 is the contingency table for the result of the treatment and the result of the  $\chi^2$  test can be found at its caption.

The *p*-value obtained was 0.001135. A mosaic plot for this can be found in Figure 33.

Table S22: Results for the paired differences of HCT D4, HCT D8 and HCT DIS between groups.

|                                   | <i>t</i> | DF     | <i>p</i> -value | 95 % confidence interval |
|-----------------------------------|----------|--------|-----------------|--------------------------|
| HCT-D4 CONTROL and HCT D4 NEGBAL  | -4.0163  | 108.99 | 0.0001089       | [-5.907331, -2.003513]   |
| HCT-D8 CONTROL and HCT D8 NEGBAL  | -3.8716  | 81.502 | 0.0002171       | [-6.385501, -2.050530]   |
| HCT-ADM NEGBAL and HCT DIS NEGBAL | -3.88    | 110.17 | 0.0001782       | [-6.993731, -2.264890]   |

Figure S12: Boxplot for PAFI D8 CONTROL and PAFI D8 NEGBAL.

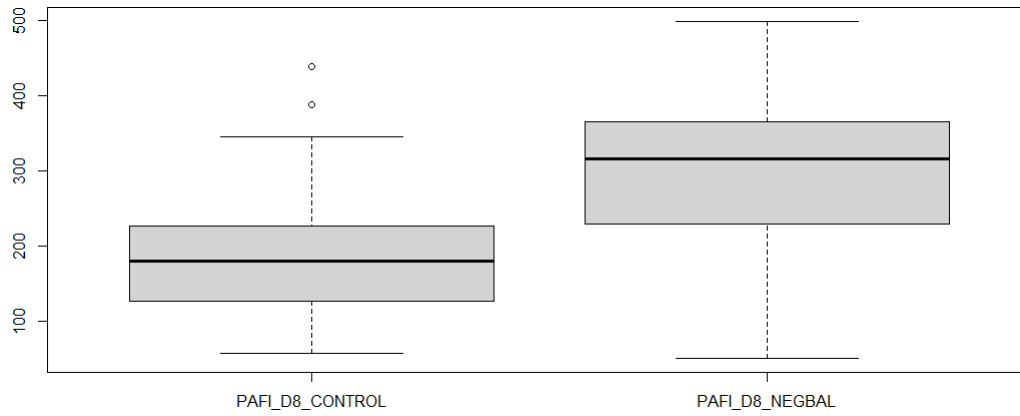

Figure S13: Boxplot for PAFI DIS CONTROL and PAFI DIS NEGBAL.

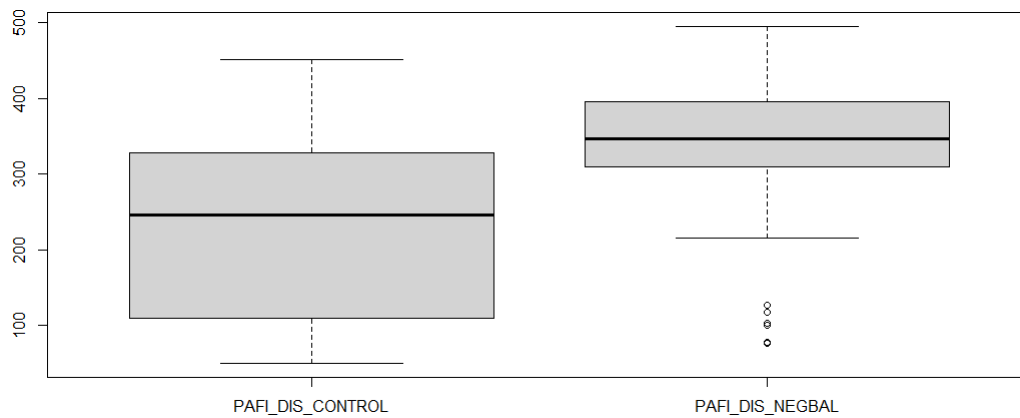

Table S23: Results for the paired differences of CREAT D4, CREAT D8 and CREAT DIS between groups.

|                                        | <i>t</i> | DF     | <i>p</i> -value | 95 % confidence interval |
|----------------------------------------|----------|--------|-----------------|--------------------------|
| CREAT-D4 CONTROL and CREAT D4 NEGBAL   | -2.1734  | 106.16 | 0.03197         | [-2.9372802, -0.1348627] |
| CREAT-D8 CONTROL and CREAT D8 NEGBAL   | -0.14601 | 68.883 | 0.8843          | [ -2.879588, 2.486835]   |
| CREAT-DIS- NEGBAL and CREAT DIS NEGBAL | 0.88977  | 110.42 | 0.3755          | [-1.845007, 4.851904]    |



Figure S14: Boxplot for HCT D4 CONTROL and HCT\_D4 NEGBAL.

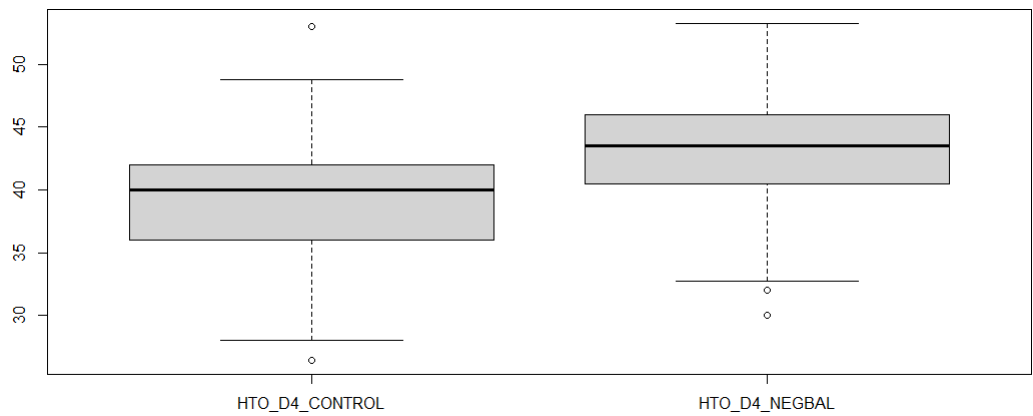

Figure S15: Boxplot for HCT D8 CONTROL and HCT\_D8 NEGBAL.

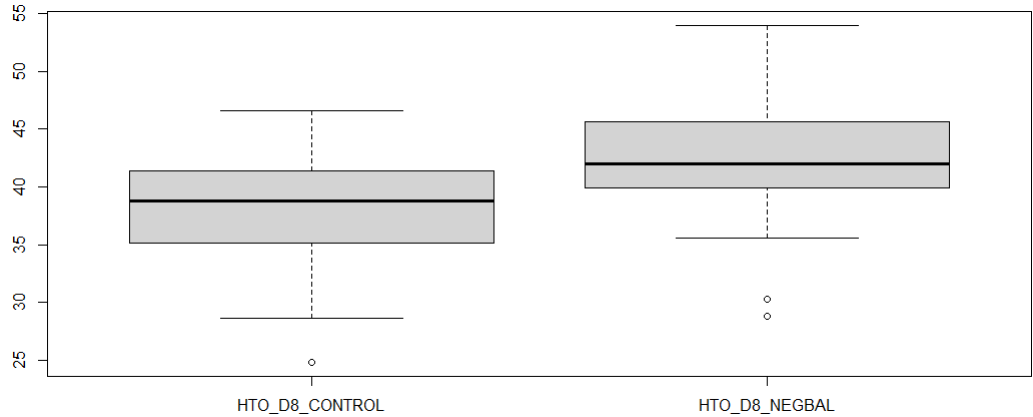

Figure S16: Boxplot for HCT DIS CONTROL and HCT DIS NEGBAL.

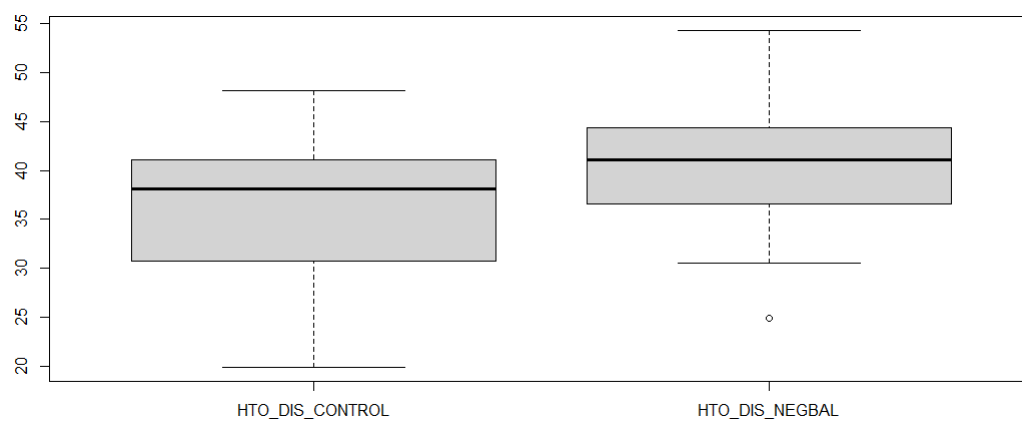

Figure S17: Boxplot for CREAT D4 CONTROL and CREAT D4 NEGBAL.

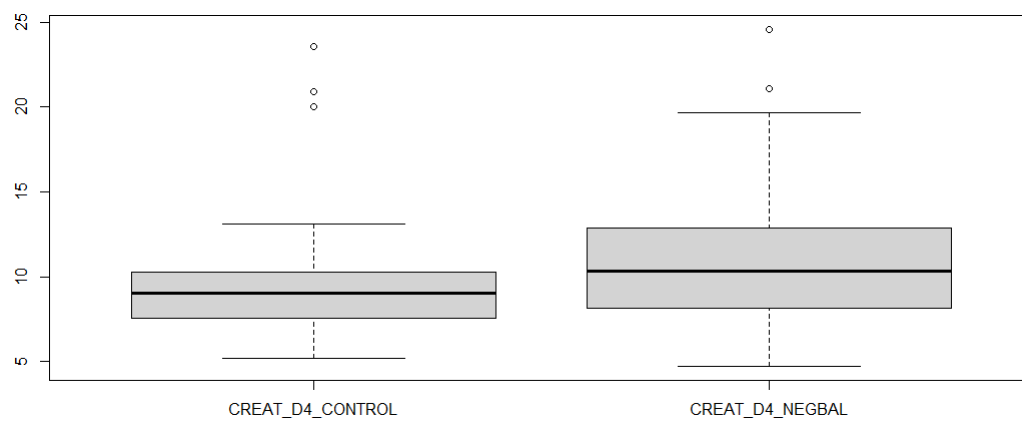

Figure S18: Boxplot for CREAT\_D8 CONTROL and CREAT\_D8 NEGBAL.

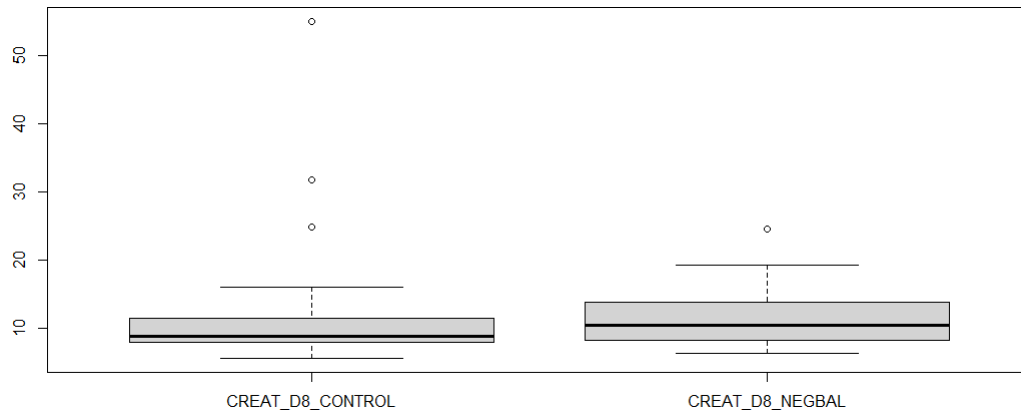

Figure S19: Boxplot for CREAT\_DIS CONTROL and CREAT\_DIS NEGBAL.

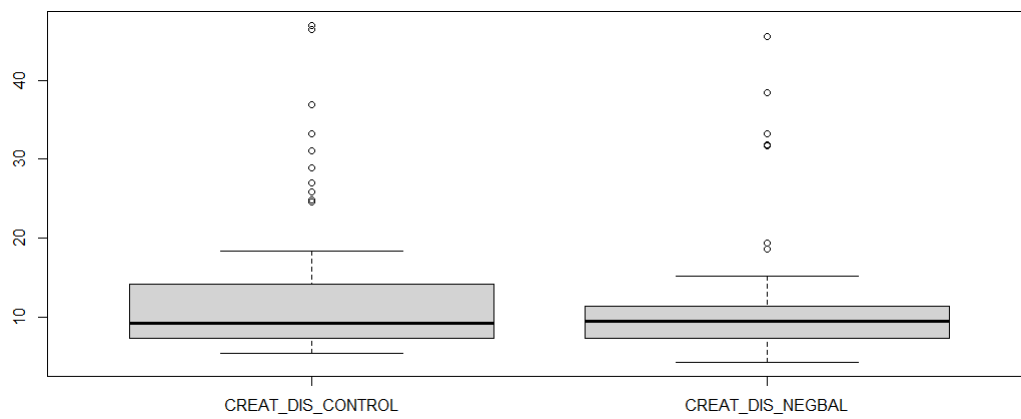

Table S24: Results LEUC ADM CONTROL and LEUC ADM NEGBAL.

|                    | LEUC-ADM CONTROL | LEUC-ADM NEGBAL |
|--------------------|------------------|-----------------|
| 1                  | 6800             | 12140           |
| 2                  | 9900             | 16760           |
| 3                  | 8900             | 22000           |
| 4                  | 6330             | 8450            |
| 5                  | 13300            | 9210            |
| 6                  | 6960             | 16560           |
| 7                  | 10300            | 16830           |
| 8                  | 11710            | 8000            |
| 9                  | 6340             | 8510            |
| 10                 | 7460             | 14450           |
| 11                 | 4380             | 5850            |
| 12                 | 9200             | 13670           |
| 13                 | 6880             | 17700           |
| 14                 | 7700             | 16900           |
| 15                 | 10180            | 14090           |
| 16                 | 6370             | 6900            |
| 17                 | 7370             | 7050            |
| 18                 | 18000            | 16500           |
| 19                 | 6220             | 6530            |
| 20                 | 9500             | 6660            |
| 21                 | 4780             | 8800            |
| 22                 | 4960             | 3890            |
| 23                 | 6370             | 10470           |
| 24                 | 7510             | 4430            |
| 25                 | 4170             | 3830            |
| 26                 | 7600             | 24500           |
| 27                 | 5170             | 9980            |
| 28                 | 5910             | 5630            |
| 29                 | 7600             | 6370            |
| 30                 | 3730             | 10470           |
| 31                 | 7650             | 32150           |
| 32                 | 9840             | 7240            |
| 33                 | 11500            | 9780            |
| 34                 | 6790             | 8550            |
| 35                 | 9110             | 8570            |
| 36                 | 8690             | 12530           |
| 37                 | 9200             | 8080            |
| 38                 | 3430             | 8830            |
| 39                 | 5200             | 4840            |
| 40                 | 7080             | 3870            |
| 41                 | 30070            | 6260            |
| 42                 | 6140             | 6410            |
| 43                 | 7770             | 17150           |
| 44                 | 13090            | 14570           |
| 45                 | 5510             | 5020            |
| 46                 | 5560             | 4440            |
| 47                 | 3170             | 5020            |
| 48                 | 7590             | 6020            |
| 49                 | 5080             | 12240           |
| 50                 | 7600             | 23730           |
| 51                 | 5180             | 10130           |
| 52                 | 7470             | 11800           |
| 53                 | 7240             | 10100           |
| 54                 | 5020             | 11780           |
| 55                 | 4110             | 11870           |
| 56                 | 6300             | 10790           |
| 57                 | 3830             | 3600            |
| 58                 | 11430            | 6100            |
| Mean               | 7797             | 10597           |
| Median             | 7160             | 9020            |
| Standard deviation | 4040.17          | 5796.05         |

Table S25: Results for the paired differences between LEUC\_ADM\_CONTROL and LEUC\_ADM\_NEGBAL.

|                                      | <i>t</i> | DF     | <i>p</i> -value | 95 % confidence interval |
|--------------------------------------|----------|--------|-----------------|--------------------------|
| LEUC_ADM_CONTROL and LEUC_ADM_NEGBAL | -3.0173  | 101.81 | 0.003222        | [-4639.2823, -958.9936]  |

Figure S20: Boxplot for LEUC\_ADM\_CONTROL and LEUC\_ADM\_NEGBAL.

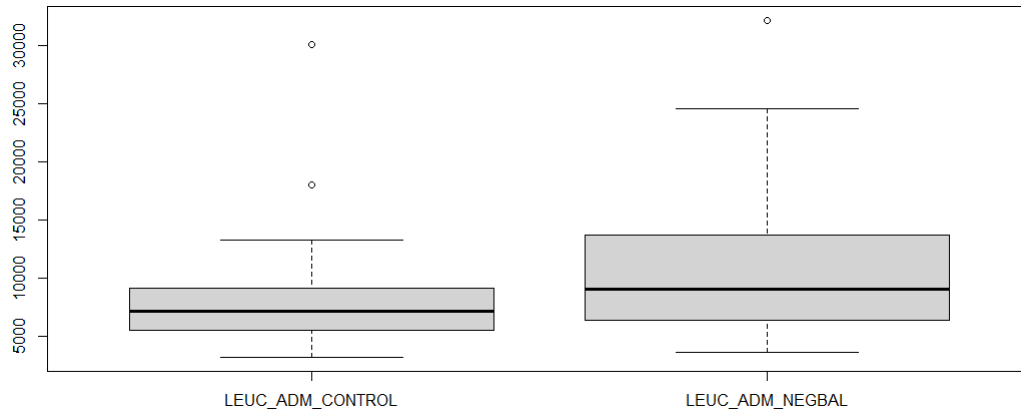

Table S26: Results for the paired differences of CTSCORE\_ADM, CTSCORE\_D4, CTSCORE\_D8 and CTSCORE\_D12 between groups.

|                                            | <i>t</i> | DF     | <i>p</i> -value | 95 % confidence interval |
|--------------------------------------------|----------|--------|-----------------|--------------------------|
| CTSCORE_ADM_CONTROL and CTSCORE_ADM_NEGBAL | 0.24334  | 108.18 | 0.8082          | [-1.519464, 1.944751]    |
| CTSCORE_D4_CONTROL and CTSCORE_D4_NEGBAL   | 4.6922   | 50.014 | 2.13e-05        | [3.319251, 8.287675]     |
| CTSCORE_D8_CONTROL and CTSCORE_D8_NEGBAL   | 4.5726   | 29.231 | 8.175e-05       | [4.18968, 10.96620]      |
| CTSCORE_D12_CONTROL and CTSCORE_D12_NEGBAL | 1.0991   | 9.0738 | 0.3             | [-3.404303, 9.854303]    |

Table S27: Results for the paired differences of SVC\_ADM, SVC\_D4, SVC\_D8 and SVC\_D12 between groups.

|                                    | <i>t</i> | DF     | <i>p</i> -value | 95 % confidence interval |
|------------------------------------|----------|--------|-----------------|--------------------------|
| SVC_ADM_CONTROL and SVC_ADM_NEGBAL | 1.4783   | 105.01 | 0.1423          | [-0.2813917, 1.9303196]  |
| SVC_D4_CONTROL and SVC_D4_NEGBAL   | 5.781    | 47.589 | 5.55e-07        | [3.292002, 6.804275]     |
| SVC_D8_CONTROL and SVC_D8_NEGBAL   | 5.2026   | 30.594 | 1.246e-05       | [3.147636, 7.210373]     |
| SVC_D12_CONTROL and SVC_D12_NEGBAL | 1.6744   | 9.4462 | 0.1268          | [-0.8919007, 6.1169007]  |

Figure S21: Boxplot for CTSCORE ADM CONTROL and CTSCORE ADM NEGBAL.

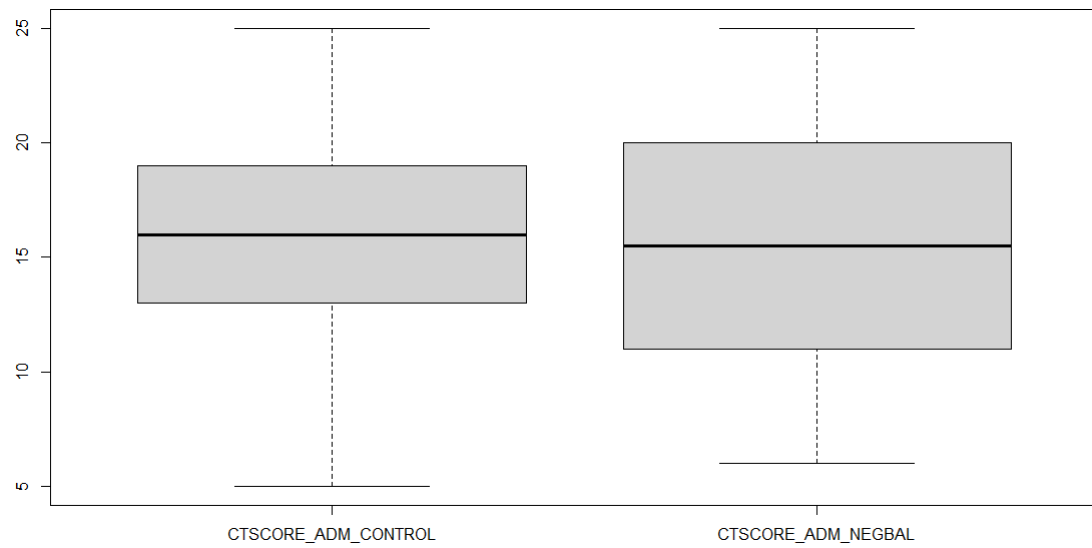

Figure S22: Boxplot for CTSCORE\_D4 CONTROL and CTSCORE\_D4 NEGBAL.

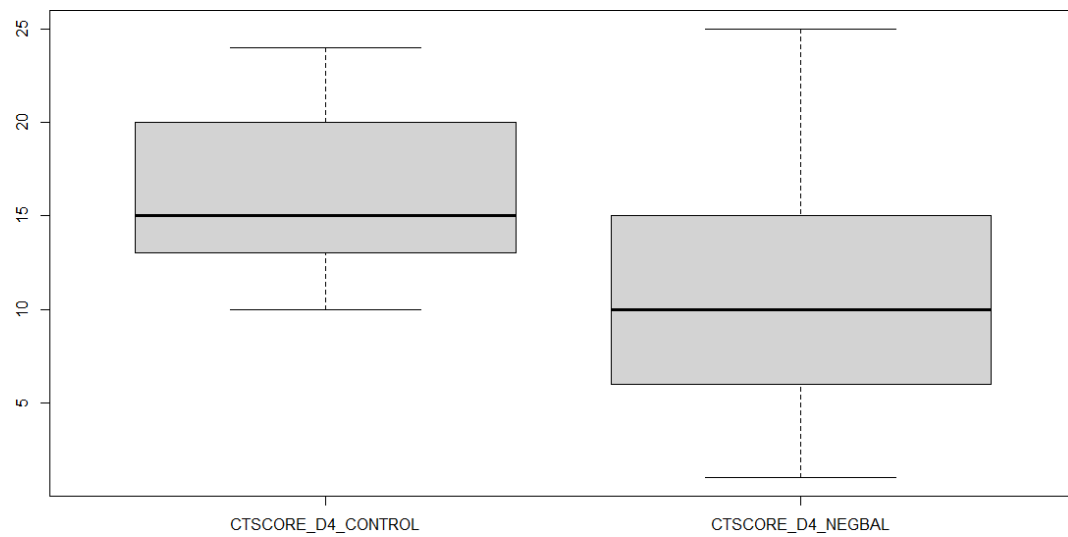

Figure S23: Boxplot for CTSCORE\_D8 CONTROL and CTSCORE\_D8 NEGBAL.

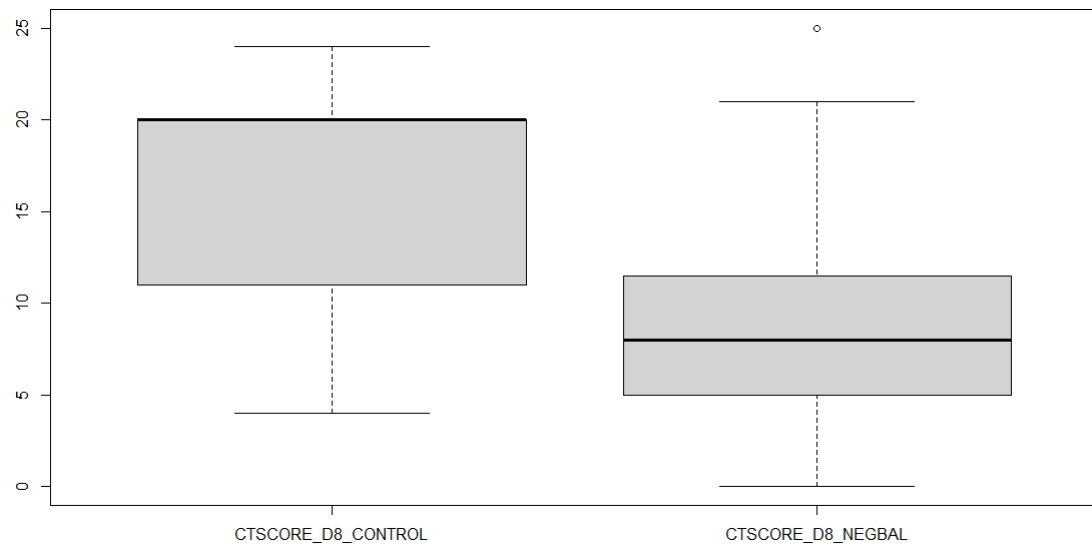

Figure S24: Boxplot for CTSCORE\_D12 CONTROL and CTSCORE\_D12 NEGBAL.

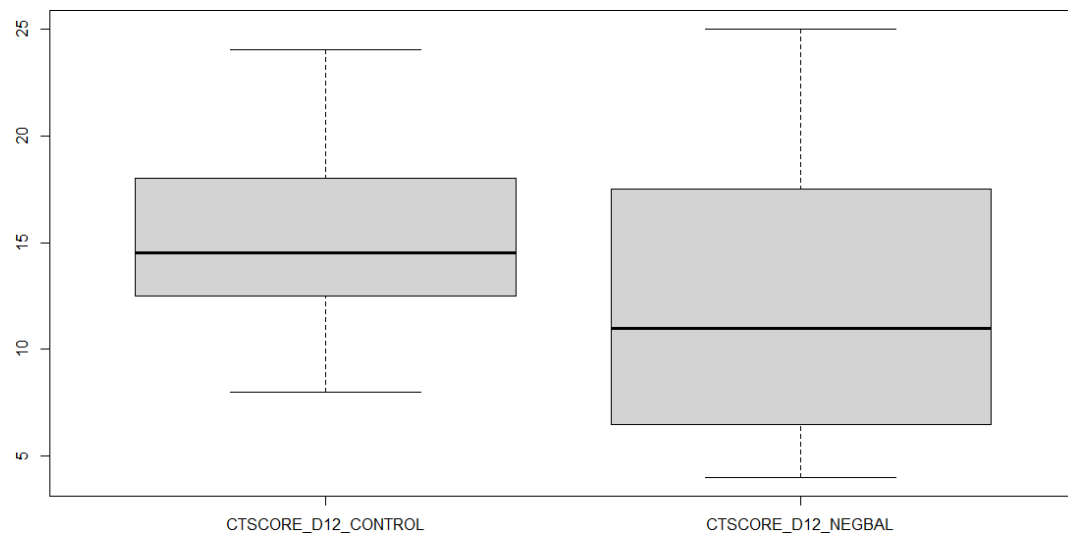

Figure S25: Boxplot for SVC ADM CONTROL and SVC ADM NEGBAL.

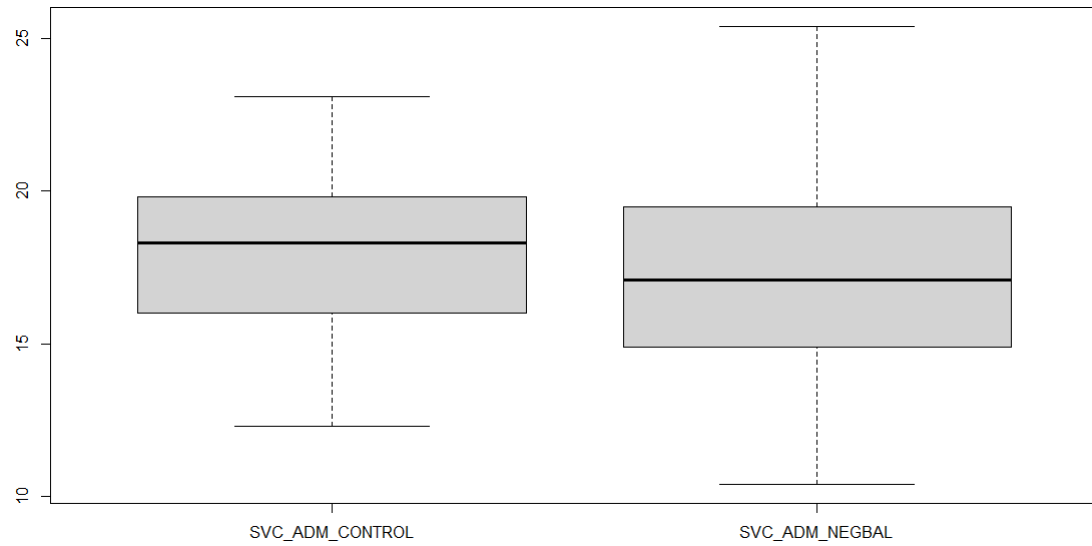

Figure S26: Boxplot for SVC D4 CONTROL and SVC D4 NEGBAL.

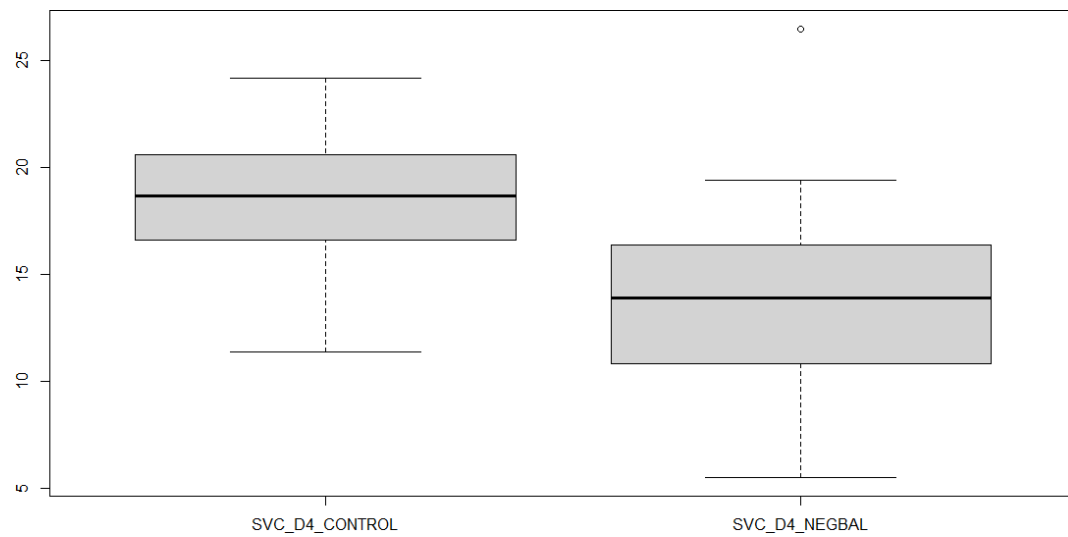



Figure S27: Boxplot for SVC D8 CONTROL and SVC D8 NEGBAL.

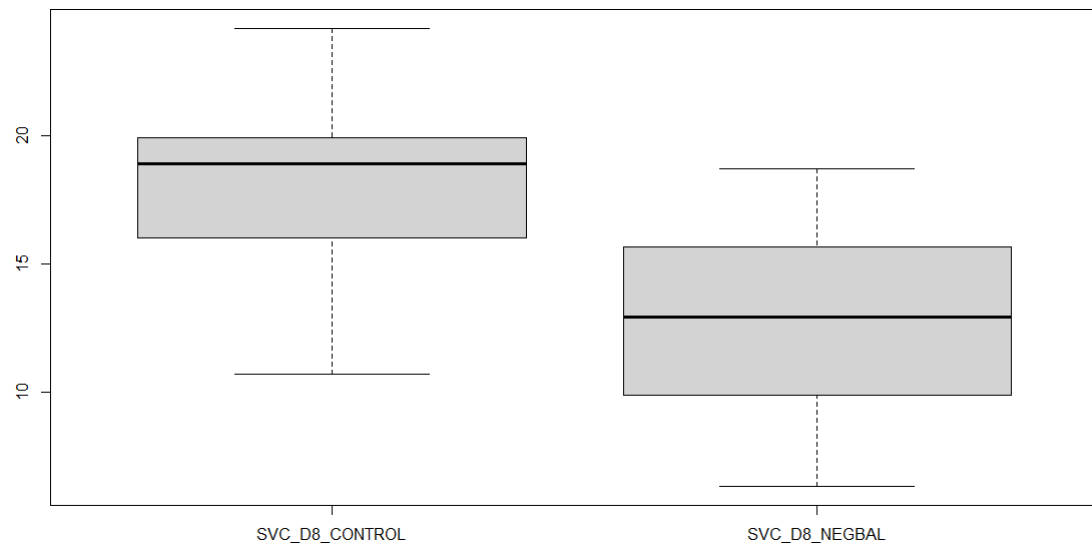

Figure S28: Boxplot for SVC D12 CONTROL and SVC D12 NEGBAL.

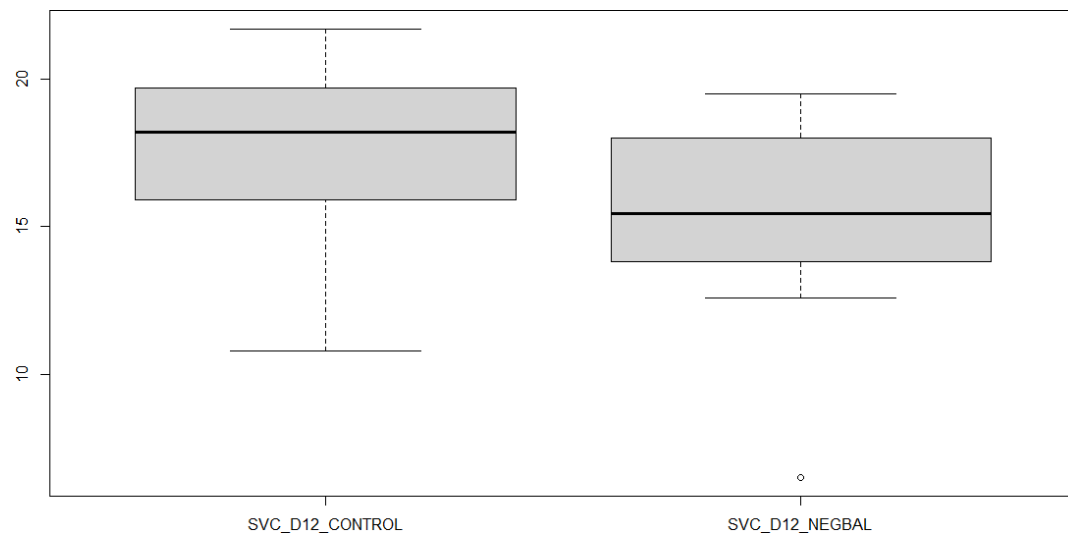

Figure S29: Boxplot for ACC HYD BAL CONTROL and ACC HYD BAL NEGBAL.

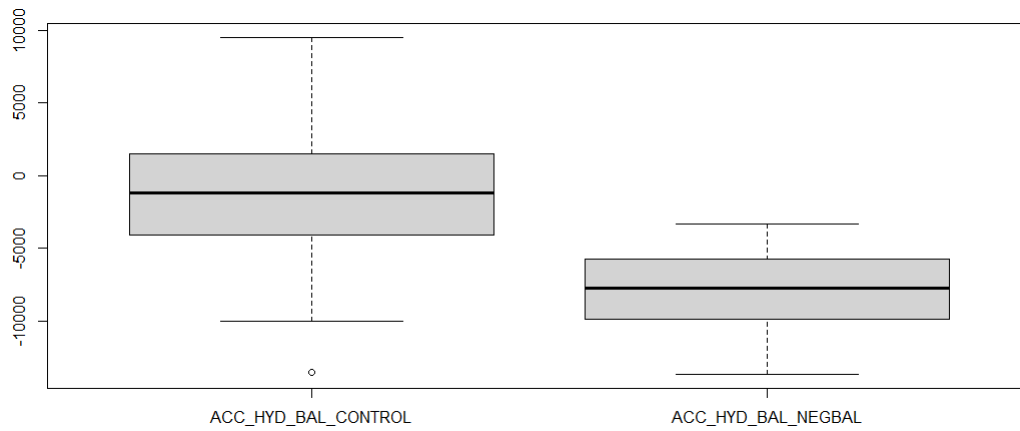

### 3.3 Regression

Regarding the model (1) for the CONTROL group, the  $p$  value obtained was 0.007238; the scatter plot and the regressionline can be seen in Figure 34. For the NEGBAL\_group the  $p$  value obtained was 0.0429; the scatter plot and the regressionline can be seen in Figure 35.

Regarding the multivariate model (2), the  $p$ -values for the variables ACC HYD BAL and VAC account for whether or not such variables are significant explaining the variation of the variable PaFiO<sub>2</sub>. In particular, the  $p$  value obtained for the variable ACC HYD BAL was 1.43e-07, which is highly significant. As for the the variable VAC, the  $p$  values where 0.671

for the linear and 0.723 for the quadratic fit respectively, which are far from significant in both cases. A stripchart for the PaFiO<sub>2</sub> variable v vaccination can be found in Figure 36.

### 3.4 Accumulated hydric balance comparison

Figures 37, 38 and 39 contain the boxplots for ACC HYD BAL for the CONTROL group, subdivided by survivors and non survivors, the NEGBAL group, subdivided by survivors and non survivors and the whole population subdivided by survivors and non survivors respectively. The results for the paired difference tests can be found in Table 38. Table 38

Table S28: Results of Accumulated Hydric Balance of CONTROL group.

|                    | ACC-HYD BAL CONTROL |
|--------------------|---------------------|
| 1                  | 7610                |
| 2                  | -6450               |
| 3                  | -                   |
| 4                  | 3000                |
| 5                  | -700                |
| 6                  | -                   |
| 7                  | -1890               |
| 8                  | -                   |
| 9                  | -                   |
| 10                 | -                   |
| 11                 | -                   |
| 12                 | 3260                |
| 13                 | 6575                |
| 14                 | 8900                |
| 15                 | -                   |
| 16                 | 170                 |
| 17                 | 1500                |
| 18                 | 3700                |
| 19                 | -1363               |
| 20                 | 5900                |
| 21                 | -1050               |
| 22                 | -5450               |
| 23                 | -5650               |
| 24                 | -2591               |
| 25                 | -6580               |
| 26                 | -                   |
| 27                 | -                   |
| 28                 | -4620               |
| 29                 | -4800               |
| 30                 | 2151                |
| 31                 | -                   |
| 32                 | -                   |
| 33                 | -                   |
| 34                 | -                   |
| 35                 | -                   |
| 36                 | -                   |
| 37                 | -8238               |
| 38                 | -670                |
| 39                 | -4700               |
| 40                 | 40                  |
| 41                 | -                   |
| 42                 | -                   |
| 43                 | 9545                |
| 44                 | -6670               |
| 45                 | -3440               |
| 46                 | -3810               |
| 47                 | -                   |
| 48                 | -164                |
| 49                 | -2620               |
| 50                 | -                   |
| 51                 | -13530              |
| 52                 | 4991                |
| 53                 | 1741                |
| 54                 | -                   |
| 55                 | 1196                |
| 56                 | 900                 |
| 57                 | -4061               |
| 58                 | 3010                |
| Mean               | -685.0              |
| Median             | -654.2              |
| Standard deviation | 5045.215            |

Table S29: ACC HYD BAL for survivors of the CONTROL group.

| ACC-HYD BAL CONTROL survivors |          |
|-------------------------------|----------|
| 2                             | -6450    |
| 5                             | -700     |
| 6                             | -        |
| 7                             | -1890    |
| 8                             | -        |
| 9                             | -        |
| 10                            | -        |
| 11                            | -        |
| 16                            | 170      |
| 19                            | -1363    |
| 20                            | 5900     |
| 21                            | -1050    |
| 22                            | -5450    |
| 23                            | -5650    |
| 24                            | -2591    |
| 25                            | -6580    |
| 26                            | -        |
| 27                            | -        |
| 28                            | -4620    |
| 29                            | -4800    |
| 32                            | -        |
| 34                            | -        |
| 36                            | -        |
| 37                            | -8238    |
| 38                            | -670     |
| 40                            | 40       |
| 44                            | -6670    |
| 45                            | -3440    |
| 46                            | -3810    |
| 47                            | -        |
| 48                            | -164     |
| 49                            | -2620    |
| 50                            | -        |
| 51                            | -13530   |
| 52                            | 4991     |
| 54                            | -        |
| 56                            | 900      |
| Mean                          | -3353    |
| Median                        | -2596    |
| Standard deviation            | 3844.251 |

Table S30: ACC\_HYD\_BAL for nonsurvivors of the CONTROL group.

| ACC_HYD_BAL CONTROL nonsurvivors |          |
|----------------------------------|----------|
| 1                                | 7610     |
| 3                                | -        |
| 4                                | 3000     |
| 12                               | 3260     |
| 13                               | 6575     |
| 14                               | 8900     |
| 15                               | -        |
| 17                               | 1500     |
| 18                               | 3700     |
| 26                               | -        |
| 30                               | 2151     |
| 31                               | -        |
| 33                               | -        |
| 35                               | -        |
| 39                               | -4700    |
| 41                               | -        |
| 43                               | 9545     |
| 53                               | 1741     |
| 55                               | 1196     |
| 57                               | -4061    |
| 58                               | 3010     |
| Mean                             | 1815     |
| Median                           | 1898     |
| Standard deviation               | 4526.475 |

Figure S30: Boxplot for HOSP\_DAYS\_CONTROL and HOSP\_DAYS\_NEGBAL.

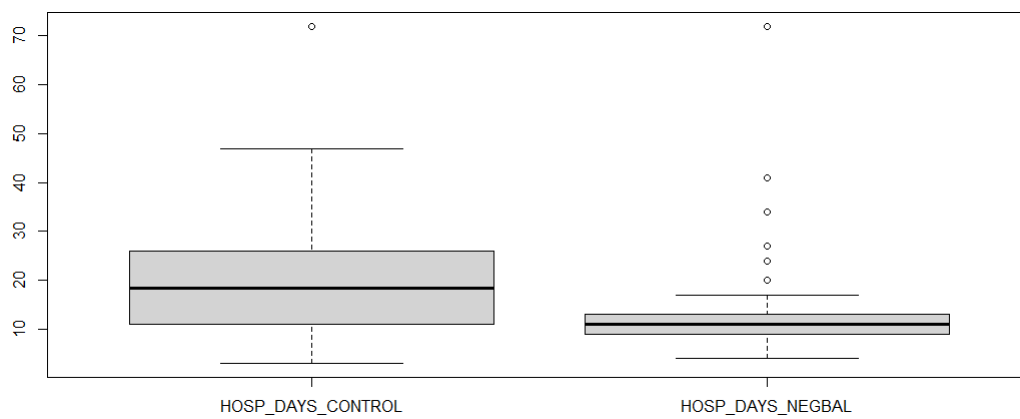

Table S31: Results of Accumulated Hydric Balance of NEGBAL group.

|                    | ACC-HYD BAL NEGBAL |
|--------------------|--------------------|
| 1                  | -3425              |
| 2                  | -11250             |
| 3                  | -8800              |
| 4                  | -6937              |
| 5                  | -9350              |
| 6                  | -10250             |
| 7                  | -4600              |
| 8                  | -10880             |
| 9                  | -6800              |
| 10                 | -7630              |
| 11                 | -5572              |
| 12                 | -9439              |
| 13                 | -7838              |
| 14                 | -7458              |
| 15                 | -5645              |
| 16                 | -5490              |
| 17                 | -3298              |
| 18                 | -9160              |
| 19                 | -11601             |
| 20                 | -9248              |
| 21                 | -7373              |
| 22                 | -6811              |
| 23                 | -5575              |
| 24                 | -5714              |
| 25                 | -9325              |
| 26                 | -6851              |
| 27                 | -7893              |
| 28                 | -5045              |
| 29                 | -13117             |
| 30                 | -11340             |
| 31                 | -11423             |
| 32                 | -7289              |
| 33                 | -5255              |
| 34                 | -4770              |
| 35                 | -9976              |
| 36                 | -7429              |
| 37                 | -8555              |
| 38                 | -9879              |
| 39                 | -5348              |
| 40                 | -12430             |
| 41                 | -10126             |
| 42                 | -7010              |
| 43                 | -4550              |
| 44                 | -12064             |
| 45                 | -10686             |
| 46                 | -10710             |
| 47                 | -7170              |
| 48                 | -5003              |
| 49                 | -6460              |
| 50                 | -8500              |
| 51                 | -9580              |
| 52                 | -8250              |
| 53                 | -9426              |
| 54                 | -8910              |
| 55                 | -5020              |
| 56                 | -6060              |
| 57                 | -6300              |
| 58                 | -13700             |
| Mean               | -8027              |
| Median             | -7734              |
| Standard deviation | 2516.09            |

Table S32: Results for the paired differences of ACC HYD BAL between groups.

|                                            | <i>t</i> | DF     | <i>p</i> -value | 95 % confidence interval |
|--------------------------------------------|----------|--------|-----------------|--------------------------|
| ACC HYD BAL CONTROL and ACC HYD BAL NEGBAL | 9.1198   | 69.744 | 1.647e-13       | [5419.504, 8453.666]     |

Figure S31: Boxplot for ICU\_DAYS CONTROL and ICU DAYS NEGBAL.

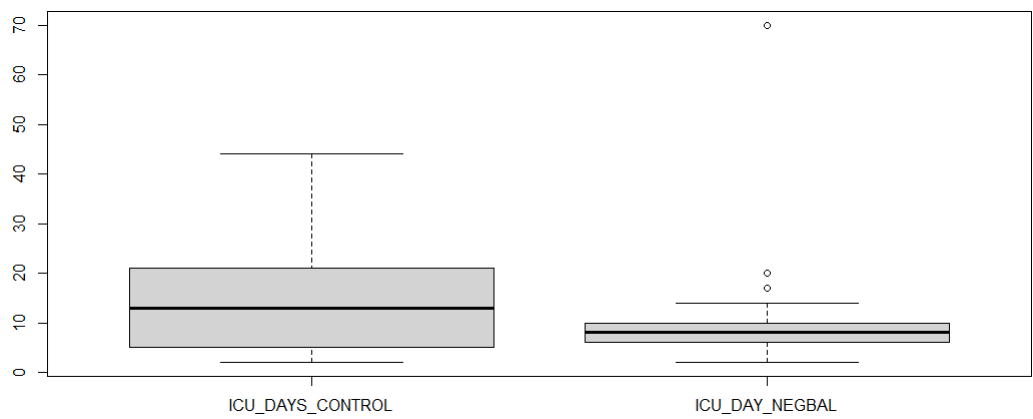

Figure S32: Boxplot for IMV DAYS CONTROL and IMV DAYS NEGBAL.

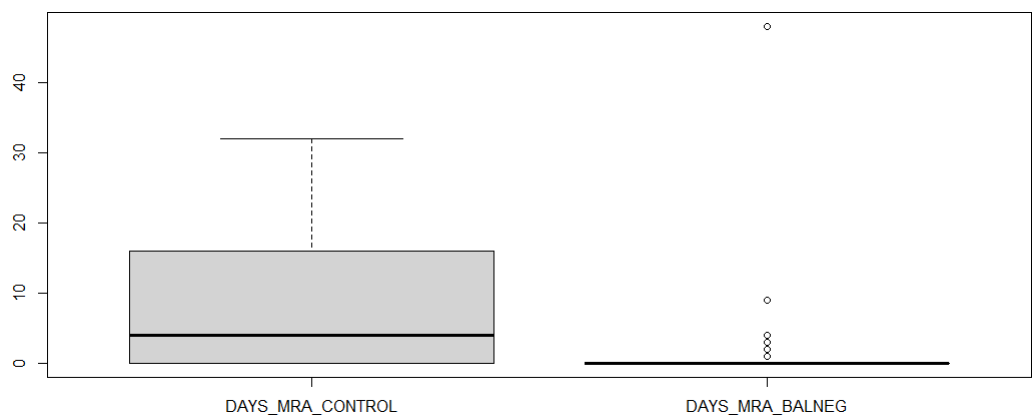

Table S33: Results of HOSP DAYS, ICU DAYS and IMV DAYS in CONTROL group.

|                    | HOSP-DAYS CONTROL | ICU-DAYS CONTROL | DAYS MiV CONTROL |
|--------------------|-------------------|------------------|------------------|
| 1                  | 14                | 13               | 12               |
| 2                  | 17                | 17               | 10               |
| 3                  | 29                | 29               | 29               |
| 4                  | 6                 | 3                | 3                |
| 5                  | 17                | 10               | 0                |
| 6                  | 4                 | 2                | 0                |
| 7                  | 9                 | 4                | 0                |
| 8                  | 12                | 4                | 0                |
| 9                  | 8                 | 3                | 0                |
| 10                 | 7                 | 7                | 0                |
| 11                 | 4                 | 2                | 0                |
| 12                 | 19                | 14               | 12               |
| 13                 | 25                | 21               | 16               |
| 14                 | 36                | 21               | 20               |
| 15                 | 18                | 18               | 18               |
| 16                 | 15                | 6                | 0                |
| 17                 | 28                | 26               | 26               |
| 18                 | 15                | 13               | 7                |
| 19                 | 45                | 38               | 25               |
| 20                 | 47                | 36               | 32               |
| 21                 | 13                | 11               | 0                |
| 22                 | 35                | 30               | 2                |
| 23                 | 24                | 13               | 0                |
| 24                 | 26                | 16               | 8                |
| 25                 | 19                | 12               | 0                |
| 26                 | 19                | 19               | 18               |
| 27                 | 13                | 10               | 0                |
| 28                 | 22                | 17               | 0                |
| 29                 | 16                | 13               | 0                |
| 30                 | 31                | 31               | 28               |
| 31                 | 21                | 17               | 15               |
| 32                 | 43                | 38               | 21               |
| 33                 | 24                | 24               | 20               |
| 34                 | 8                 | 4                | 0                |
| 35                 | 18                | 15               | 14               |
| 36                 | 10                | 5                | 0                |
| 37                 | 29                | 14               | 0                |
| 38                 | 15                | 4                | 0                |
| 39                 | 22                | 20               | 10               |
| 40                 | 11                | 3                | 0                |
| 41                 | 5                 | 5                | 5                |
| 42                 | 13                | 8                | 0                |
| 43                 | 10                | 8                | 5                |
| 44                 | 7                 | 5                | 0                |
| 45                 | 32                | 3                | 0                |
| 46                 | 20                | 20               | 0                |
| 47                 | 6                 | 5                | 0                |
| 48                 | 20                | 20               | 11               |
| 49                 | 16                | 5                | 0                |
| 50                 | 30                | 29               | 13               |
| 51                 | 10                | 9                | 0                |
| 52                 | 47                | 44               | 27               |
| 53                 | 19                | 18               | 18               |
| 54                 | 19                | 11               | 5                |
| 55                 | 43                | 40               | 30               |
| 56                 | 72                | 43               | 27               |
| 57                 | 26                | 23               | 11               |
| 58                 | 3                 | 3                | 0                |
| Mean               | 20.52             | 15.55            | 4                |
| Median             | 18.50             | 13.00            | 8.58             |
| Standard deviation | 13.21             | 11.47            | 10.29            |



Table S34: Results of HOSP DAYS, ICU DAYS and IMV DAYS in NEGBAL group.

|                    | HOSP-DAYS NEGBAL | ICU-DAYS NEGBAL | DAYS MiV NEGBAL |
|--------------------|------------------|-----------------|-----------------|
| 1                  | 14               | 12              | 9               |
| 2                  | 14               | 5               | 3               |
| 3                  | 14               | 9               | 0               |
| 4                  | 8                | 7               | 0               |
| 5                  | 12               | 8               | 0               |
| 6                  | 11               | 9               | 0               |
| 7                  | 12               | 2               | 0               |
| 8                  | 10               | 2               | 0               |
| 9                  | 4                | 2               | 0               |
| 10                 | 27               | 20              | 0               |
| 11                 | 11               | 8               | 0               |
| 12                 | 10               | 8               | 0               |
| 13                 | 8                | 7               | 0               |
| 14                 | 7                | 5               | 0               |
| 15                 | 13               | 8               | 0               |
| 16                 | 9                | 6               | 0               |
| 17                 | 10               | 9               | 1               |
| 18                 | 17               | 6               | 0               |
| 19                 | 9                | 8               | 0               |
| 20                 | 10               | 9               | 0               |
| 21                 | 10               | 5               | 0               |
| 22                 | 7                | 5               | 0               |
| 23                 | 34               | 14              | 0               |
| 24                 | 5                | 2               | 0               |
| 25                 | 10               | 10              | 2               |
| 26                 | 10               | 8               | 0               |
| 27                 | 8                | 5               | 0               |
| 28                 | 15               | 14              | 0               |
| 29                 | 11               | 10              | 0               |
| 30                 | 11               | 10              | 0               |
| 31                 | 13               | 8               | 0               |
| 32                 | 13               | 11              | 0               |
| 33                 | 6                | 2               | 0               |
| 34                 | 7                | 6               | 0               |
| 35                 | 13               | 12              | 0               |
| 36                 | 14               | 14              | 1               |
| 37                 | 11               | 11              | 1               |
| 38                 | 10               | 8               | 0               |
| 39                 | 11               | 7               | 0               |
| 40                 | 12               | 9               | 0               |
| 41                 | 10               | 6               | 0               |
| 42                 | 5                | 3               | 0               |
| 43                 | 8                | 4               | 0               |
| 44                 | 11               | 10              | 0               |
| 45                 | 8                | 7               | 0               |
| 46                 | 12               | 10              | 0               |
| 47                 | 20               | 17              | 2               |
| 48                 | 7                | 7               | 4               |
| 49                 | 11               | 9               | 0               |
| 50                 | 13               | 12              | 0               |
| 51                 | 7                | 7               | 0               |
| 52                 | 72               | 70              | 48              |
| 53                 | 14               | 9               | 0               |
| 54                 | 24               | 5               | 0               |
| 55                 | 11               | 6               | 0               |
| 56                 | 11               | 6               | 0               |
| 57                 | 10               | 8               | 0               |
| 58                 | 41               | 5               | 0               |
| Mean               | 13.03            | 9               | 1.24            |
| Median             | 11.00            | 8.00            | 0               |
| Standard deviation | 13.24            | 8.91            | 6.40            |

Table S35: Results for the paired differences of HOSP\_DAYS, ICU DAYS and IMV DAYS between groups.

|                                        | <i>t</i> | DF     | <i>p</i> -value | 95 % confidence interval |
|----------------------------------------|----------|--------|-----------------|--------------------------|
| HOSP_DAYS CONTROL and HOSP DAYS NEGBAL | 3.4249   | 106.7  | 0.0008738       | [3.151546, 11.813971]    |
| ICU DAYS CONTROL and ICU DAYS NEGBAL   | 3.436    | 107.45 | 0.0008405       | [2.771879, 10.331569]    |
| IMV_DAYS CONTROL and IMV DAYS NEGBAL   | 4.6307   | 95.414 | 1.15e-05        | [4.206026, 10.518112]    |

Table 36: Result frequencies

|         | Dead | Alive |
|---------|------|-------|
| CONTROL | 22   | 36    |
| NEGBAL  | 6    | 52    |

Table S37: Pearson's  $\chi^2$  test (Yates' continuity correction):  $\chi^2= 10.593$ ,  $df = 1$ ,  $p$ -value = 0.001135

Figure 33: Mosaic plot for the result of the treatment.

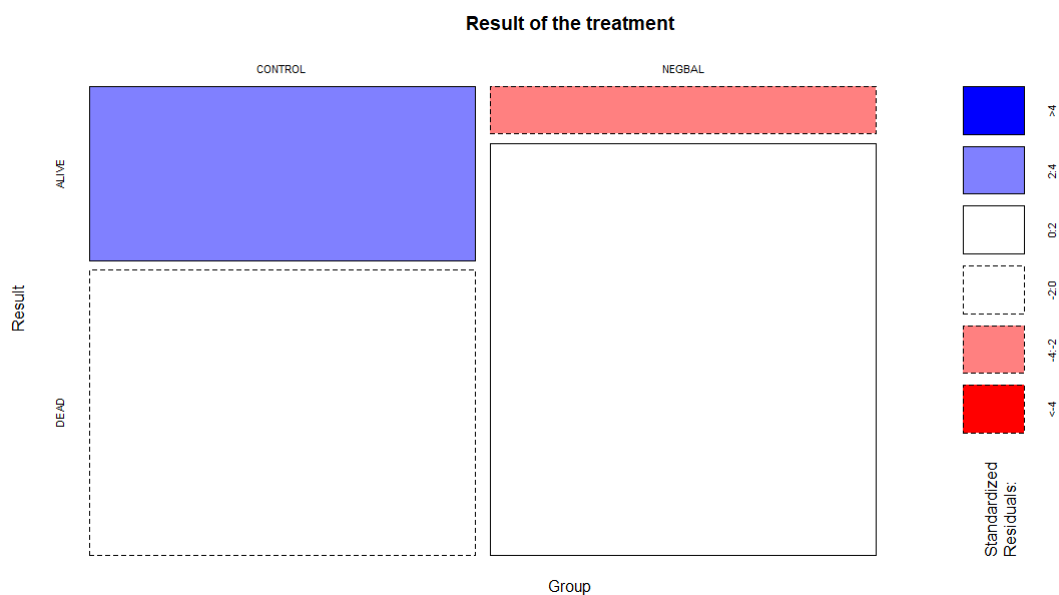

Table S38: Results for the paired differences of ACC HYD BAL between survivors and nonsurvivors within groups and in the whole population.

|                                    | <i>t</i> | DF     | <i>p</i> -value | 95 % confidence interval |
|------------------------------------|----------|--------|-----------------|--------------------------|
| ACC HYD BAL CONTROL SUR-and NONSUR | -4.2151  | 39.031 | 0.0001431       | [-7648.396, -2688.247]   |
| ACC HYD BAL NEGBAL SUR-and NONSUR  | -0.69792 | 6.4371 | 0.5096          | [-3171.740, 1745.946]    |
| ACC HYD BAL SUR and NONSUR         | -4.6943  | 31.437 | 5.002e-05       | [-8035.005, -3169.679]   |

Figure S34: Scatter plot and regression line for ACC HYD BAL CONTROL and PAFI DIS CONTROL,  $p = 0.007238$ .

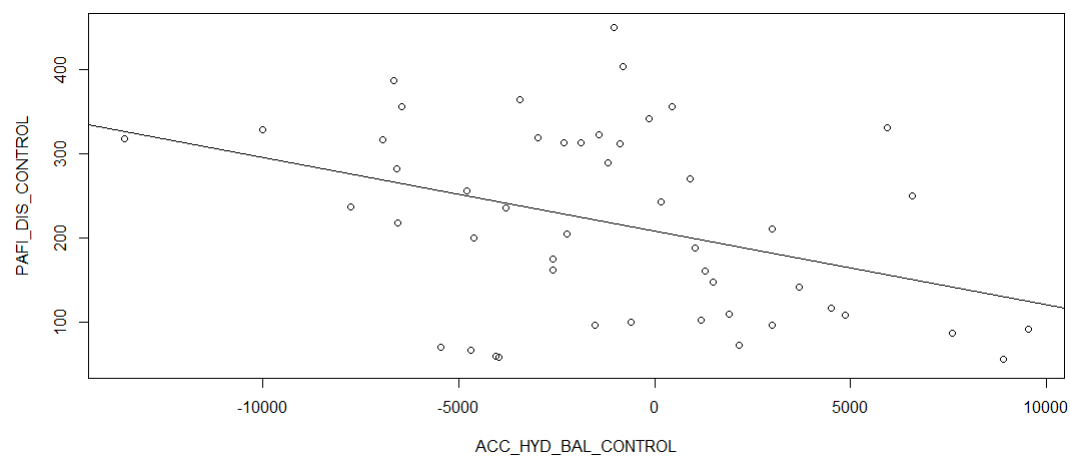

Figure S35: Scatter plot and regression line for ACC HYD BAL NEGBAL and PAFI DIS NEGBAL,  $p = 0.0429$ .

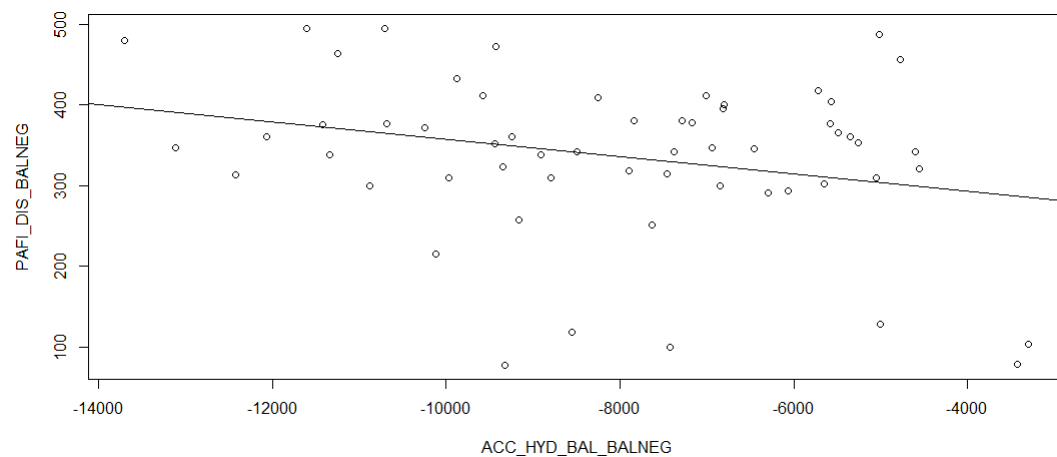

Figure S36: Stripchart for PAFI v VAC.

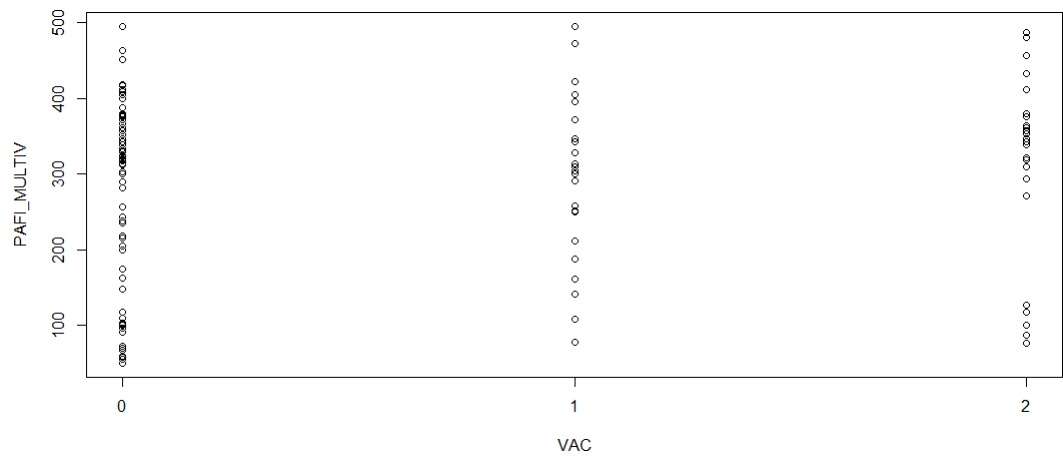

Figure S37: Boxplot for ACC\_HYD\_BAL\_CONTROL\_SUR and ACC\_HYD\_BAL\_CONTROL\_NONSUR.

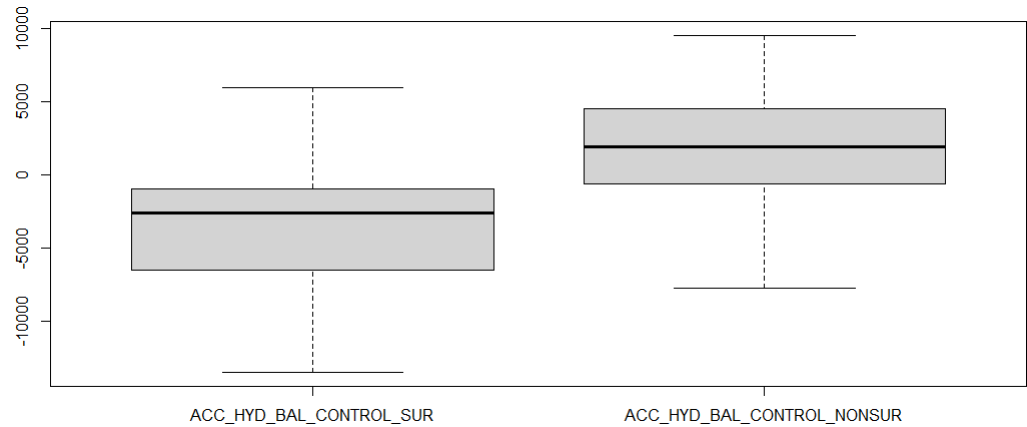

Figure S38: Boxplot for ACC HYD BAL NEGBAL SUR and ACC HYD BAL NEGBAL NONSUR.

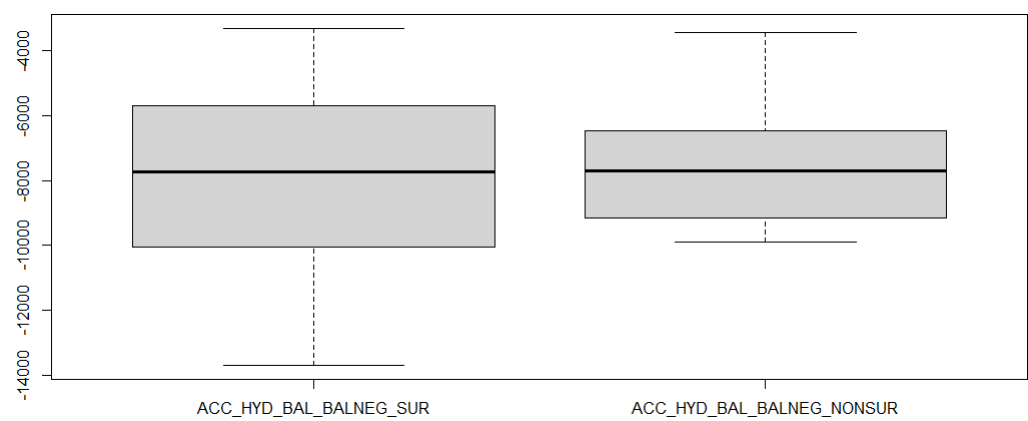

Figure S39: Boxplot for ACC HYD BAL SUR and ACC HYD BAL NONSUR.

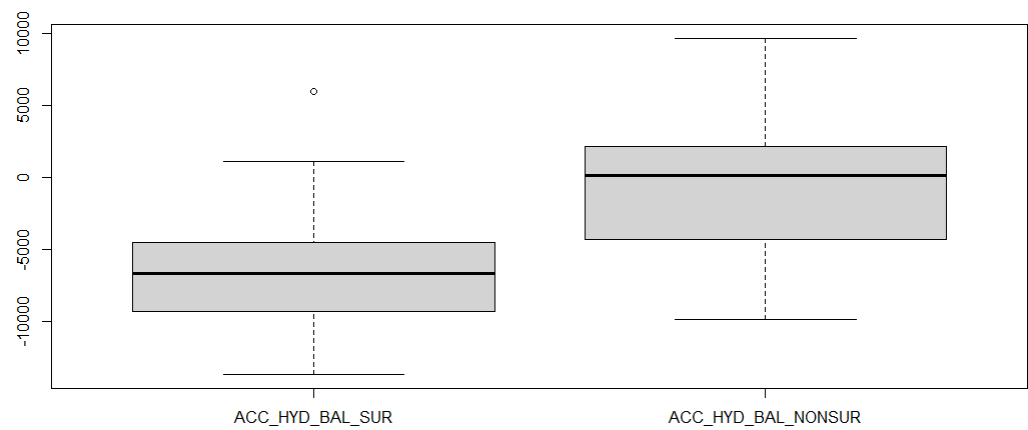

### 3.5 Attached Dossier

**Table S39: Result IMV use**

|         | No | Yes |
|---------|----|-----|
| CONTROL | 27 | 31  |
| NEGBAL  | 49 | 9   |

Table S40: Pearson's  $\chi^2$  test (Yates' continuity correction):  $\chi^2 = 16.828$ ,  $df = 1$ ,  $p\text{-value} = 4.093e-05$

**Figure S40: Boxplot for ICUfromSSD CONTROL and ICUfromSSD NEGBAL.**

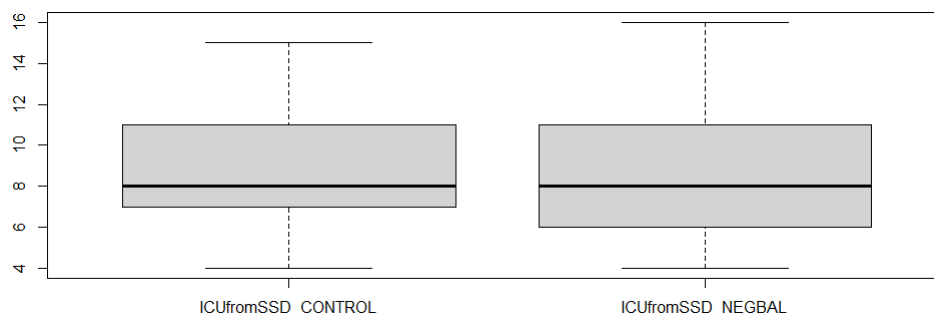

Table [S39](#) is the contingency table for the use of Intensive Mechanical Ventilation (IMV) and the result of the  $\chi^2$  test can be found at its caption. The  $p$  value obtained was  $4.093e-05$ .

Table [S41](#) shows the results of the  $t$  test for the Intensive Care Unit counted from the Symptom Start Date (ICUfromSSD) comparing both groups; the corresponding boxplot can be found in Figure S40. The data is contained in Table [S40](#).

|    | ICUfromSSD<br>CONTROL | ICUfromSSD<br>NEGBAL |
|----|-----------------------|----------------------|
| 1  | 14                    | 5                    |
| 2  | 7                     | 15                   |
| 3  | 8                     | 10                   |
| 4  | 15                    | 13                   |
| 5  | 14                    | 11                   |
| 6  | 10                    | 12                   |
| 7  | 12                    | 15                   |
| 8  | 7                     | 13                   |
| 9  | 12                    | 13                   |
| 10 | 6                     | 8                    |
| 11 | 11                    | 10                   |
| 12 | 8                     | 10                   |
| 13 | 6                     | 9                    |
| 14 | 10                    | 16                   |
| 15 | 14                    | 14                   |
| 16 | 11                    | 11                   |
| 17 | 12                    | 14                   |
| 18 | 9                     | 11                   |
| 19 | 7                     | 7                    |
| 20 | 7                     | 12                   |
| 21 | 12                    | 10                   |
| 22 | 8                     | 8                    |
| 23 | 10                    | 5                    |
| 24 | 7                     | 8                    |
| 25 | 9                     | 5                    |
| 26 | 7                     | 7                    |
| 27 | 13                    | 7                    |
| 28 | 5                     | 5                    |

|                    |       |      |
|--------------------|-------|------|
| 29                 | 11    | 11   |
| 30                 | 7     | 8    |
| 31                 | 10    | 6    |
| 32                 | 7     | 7    |
| 33                 | 11    | 5    |
| 34                 | 8     | 11   |
| 35                 | 10    | 6    |
| 36                 | 8     | 6    |
| 37                 | 5     | 4    |
| 38                 | 6     | 5    |
| 39                 | 10    | 9    |
| 40                 | 10    | 7    |
| 41                 | 8     | 11   |
| 42                 | 8     | 4    |
| 43                 | 8     | 9    |
| 44                 | 6     | 8    |
| 45                 | 13    | 8    |
| 46                 | 8     | 11   |
| 47                 | 8     | 7    |
| 48                 | 7     | 5    |
| 49                 | 13    | 4    |
| 50                 | 7     | 6    |
| 51                 | 5     | 8    |
| 52                 | 5     | 5    |
| 53                 | 12    | 4    |
| 54                 | 9     | 4    |
| 55                 | 11    | 12   |
| 56                 | 10    | 9    |
| 57                 | 6     | 12   |
| 58                 | 4     | 12   |
| Mean               | 8.932 | 8    |
| Median             | 8.759 | 8    |
| Standard deviation | 2.73  | 3.28 |

|            |                               | <i>t</i> | DF     | <i>p</i> -value | 95 % confidence interval |
|------------|-------------------------------|----------|--------|-----------------|--------------------------|
| ICUfromSSD | CONTROL and ICUfromSSD NEGBAL | -0.31103 | 110.64 | 0.7564          | [ -1.279522 0.932357]    |

Table S41: Results for the paired differences of ICU from SSD between groups.
